# Supplementary material for: Adverse childhood experiences, the risk of pregnancy complications and adverse pregnancy outcomes: a systematic review and meta-analysis
Source: PubMed Central journal article supplement — BMJ Open. 2023 Aug 3;13(8):e063826. doi: 10.1136/bmjopen-2022-063826 (PMC10401231; doi:10.1136/bmjopen-2022-063826), 2023-08-03
Supplement: bmjopen-2022-063826.draft_revisions.pdf [file bmjopen-2022-063826.draft_revisions.pdf]

# BMJ Open

BMJ Open is committed to open peer review. As part of this commitment we make the peer review history of every article we publish publicly available.

When an article is published we post the peer reviewers' comments and the authors' responses online. We also post the versions of the paper that were used during peer review. These are the versions that the peer review comments apply to.

The versions of the paper that follow are the versions that were submitted during the peer review process. They are not the versions of record or the final published versions. They should not be cited or distributed as the published version of this manuscript.

BMJ Open is an open access journal and the full, final, typeset and author-corrected version of record of the manuscript is available on our site with no access controls, subscription charges or pay-per-view fees (<http://bmjopen.bmj.com>).

If you have any questions on BMJ Open's open peer review process please email [info.bmjopen@bmj.com](mailto:info.bmjopen@bmj.com)

# BMJ Open

## Adverse Childhood Experiences, the Risk of Pregnancy Complications and Adverse Pregnancy Outcomes: A Systematic Review and Meta-analysis

|                               |                                                                                                                                                                                                                                                                                                                                                                                                                                                                                                                                                                                                                                                                                                                                                                            |
|-------------------------------|----------------------------------------------------------------------------------------------------------------------------------------------------------------------------------------------------------------------------------------------------------------------------------------------------------------------------------------------------------------------------------------------------------------------------------------------------------------------------------------------------------------------------------------------------------------------------------------------------------------------------------------------------------------------------------------------------------------------------------------------------------------------------|
| Journal:                      | <i>BMJ Open</i>                                                                                                                                                                                                                                                                                                                                                                                                                                                                                                                                                                                                                                                                                                                                                            |
| Manuscript ID                 | bmjopen-2022-063826                                                                                                                                                                                                                                                                                                                                                                                                                                                                                                                                                                                                                                                                                                                                                        |
| Article Type:                 | Original research                                                                                                                                                                                                                                                                                                                                                                                                                                                                                                                                                                                                                                                                                                                                                          |
| Date Submitted by the Author: | 14-Apr-2022                                                                                                                                                                                                                                                                                                                                                                                                                                                                                                                                                                                                                                                                                                                                                                |
| Complete List of Authors:     | Mamun, Abdullah; Queensland University of Technology<br>Biswas, Tuhin; University of Queensland,<br>Scott, James; University of Queensland<br>Sly, P.D.; University of Queensland, Queensland Childrens Medical Research Instit<br>McIntyre, David; Mater Research Institute The University of Queensland<br>Thorpe , Karen ; University of Queensland<br>Boyle , Frances; University of Queensland<br>Dekker, N; University of Queensland, Centre for Clinical Research<br>Doi, Suhail; Qatar University, Population Medicine<br>Mitchell, Murray; QUT, Faculty of Health, School of Biomedical Sciences<br>McNeil, Keith; Queensland Health<br>Kothari, Alka ; University of Queensland<br>Hardiman, Leah; Queensland Health<br>Callaway, Leonie Kaye; Queensland Health |
| Keywords:                     | Epidemiology < TROPICAL MEDICINE, EPIDEMIOLOGY, Adverse events < THERAPEUTICS, Diabetes in pregnancy < DIABETES & ENDOCRINOLOGY, Prenatal diagnosis < OBSTETRICS                                                                                                                                                                                                                                                                                                                                                                                                                                                                                                                                                                                                           |
|                               |                                                                                                                                                                                                                                                                                                                                                                                                                                                                                                                                                                                                                                                                                                                                                                            |

SCHOLARONE™  
Manuscripts

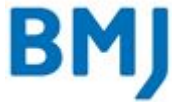

I, the Submitting Author has the right to grant and does grant on behalf of all authors of the Work (as defined in the below author licence), an exclusive licence and/or a non-exclusive licence for contributions from authors who are: i) UK Crown employees; ii) where BMJ has agreed a CC-BY licence shall apply, and/or iii) in accordance with the terms applicable for US Federal Government officers or employees acting as part of their official duties; on a worldwide, perpetual, irrevocable, royalty-free basis to BMJ Publishing Group Ltd ("BMJ") its licensees and where the relevant Journal is co-owned by BMJ to the co-owners of the Journal, to publish the Work in this journal and any other BMJ products and to exploit all rights, as set out in our [licence](#).

The Submitting Author accepts and understands that any supply made under these terms is made by BMJ to the Submitting Author unless you are acting as an employee on behalf of your employer or a postgraduate student of an affiliated institution which is paying any applicable article publishing charge ("APC") for Open Access articles. Where the Submitting Author wishes to make the Work available on an Open Access basis (and intends to pay the relevant APC), the terms of reuse of such Open Access shall be governed by a Creative Commons licence – details of these licences and which [Creative Commons](#) licence will apply to this Work are set out in our licence referred to above.

Other than as permitted in any relevant BMJ Author's Self Archiving Policies, I confirm this Work has not been accepted for publication elsewhere, is not being considered for publication elsewhere and does not duplicate material already published. I confirm all authors consent to publication of this Work and authorise the granting of this licence.

# Adverse Childhood Experiences, the Risk of Pregnancy Complications and Adverse Pregnancy Outcomes: A Systematic Review and Meta-analysis

**Author's names:** Abdullah Al Mamun, PhD<sup>1,2</sup>; Tuhin Biswas, PhD<sup>1,2</sup>; James G. Scott, PhD<sup>3,4,5</sup>; Peter D Sly, MD; DSc<sup>6</sup>; David McIntyre, PhD<sup>7</sup>; Karen Thorpe, PhD<sup>1,2</sup>; Fran Boyle, PhD<sup>1</sup>; Marloes Dekker Nitert, PhD<sup>8</sup>; Suhail A. R. Doi, PhD<sup>9,10</sup>; Murray Mitchell, PhD<sup>11</sup>; Keith McNeil, PhD<sup>12</sup>; Alka Kothari, MD FRANZCOG<sup>13,14</sup>; Leah Hardiman MSc<sup>15</sup>; Leonie Callaway, PhD<sup>15</sup>

## Author affiliations:

1. Institute for Social Science Research, The University of Queensland, QLD, Australia
2. ARC Centre of Excellence for Children and Families over the Life Course, The University of Queensland, QLD, Australia
3. Mental Health Research Program, QIMR Berghofer Medical Research Institute, Herston, QLD, Australia
4. Metro North Mental Health, Royal Brisbane and Women's Hospital, Herston, QLD, Australia
5. Queensland Centre for Mental Health Research, The Park Centre for Mental Health, Wacol, QLD, Australia
6. Children's Health and Environment Program, Child Health Research Centre, The University of Queensland, QLD, Australia
7. Mater Research, Faculty of Medicine, University of Queensland, Mater Health, QLD, Australia.
8. School of Chemistry and Molecular Biosciences, The University of Queensland, QLD, Australia
9. Research School of Population Health, Australian National University, Canberra, Australian Capital Territory
10. Department of Population Medicine, College of Medicine, Qatar University, Doha
11. Faculty of Health, School of Biomedical Sciences, The Queensland University of Technology, QLD, Australia
12. Prevention Division, Queensland Health, QLD, Australia
13. Department of Obstetrics & Gynaecology, Redcliffe Hospital, Anzac Avenue, Redcliffe, QLD, Australia
14. Faculty of Medicine, The University of Queensland, QLD, Australia
15. Women's and Children's Stream - Metro North Hospital and Health Services, QLD, Australia

## Corresponding author:

Abdullah Al Mamun  
Institute for Social Science Research,  
The University of Queensland  
80 Meiers Road, Indooroopilly, Queensland 4068, Australia.  
Email: [mamun@sph.uq.edu.au](mailto:mamun@sph.uq.edu.au)  
Telephone: +61 7 336 53163

1  
2  
3 46  
4  
5  
6 47  
7  
8 48  
9  
10 49  
11  
12 50  
13  
14 51  
15  
16 52  
17  
18 53  
19  
20 54  
21  
22 55  
23  
24 56  
25  
26 57  
27  
28 58  
29  
30 59  
31  
32 60  
33  
34 61  
35  
36 62  
37  
38 63  
39  
40 64  
41  
42 65  
43  
44 66  
45  
46 67  
47  
48 68  
49  
50 69  
51  
52 70  
53  
54 71  
55  
56 72  
57  
58 73  
59  
60 74

## ABSTRACT

**Objective** To summarise the available clinical evidence on the association between ACEs and risk of pregnancy complications and adverse pregnancy outcomes.

**Design** Overview of systematic review and meta-analysis. CRD42021278030

**Data sources** A comprehensive search on PubMed, EMBASE, CINAHL, PsycINFO and Google scholar on all relevant studies published on the association between ACEs and risk of pregnancy complications and adverse birth outcomes up to July 2021 was performed.

**Eligibility criteria for selecting studies** Population was pregnant women, reported any ACEs including childhood maltreatment, childhood trauma or childhood hardship/suffering and if studies reported any pregnancy-related complications

**Data extraction and synthesis** Two independent reviewers (TB and AAM) carried out the data extraction. Meta-analysis using the quality-effects model on the reported odds ratio (OR) was conducted. Heterogeneity and inconsistency were examined using the Q and I<sup>2</sup> statistics.

**Results** Thirty-two studies from 1,303 met *a priori* inclusion criteria for systematic review, with 20 included in the meta-analysis. Pooled analyses showed that exposure to ACEs increased the risk of pregnancy complications (odds ratio, OR=1.3, 95% CI: 1.14-1.4) and adverse pregnancy outcomes (OR=1.23, 95% CI: 1.17-1.3). In sub-group analysis, maternal ACEs were associated with gestational diabetes mellitus (OR=1.2, 95% CI: 0.9-1.5), antenatal depression (OR=1.5, 95% CI: 1.2-2.2), low offspring birth weight (OR=1.2, 95% CI: 1.2-1.3), and preterm delivery (OR=1.2, 95% CI: 1.2-1.3).

**Conclusion** The results suggest that exposure to ACEs increase the risk of pregnancy complications and adverse pregnancy outcomes. Preventive strategies, screening and trauma informed care need to be examined to improve maternal and offspring health.

1  
2  
3 754  
5 766  
7  
8 **77 Key questions**9  
10 7811  
12 **79 What is already known?**13  
14 80 • Pregnant women exposed to ACEs are considered a vulnerable group because adverse  
15 81 events in early life are associated with an increased risk of complications during  
16 82 pregnancy and adverse birth outcomes.17  
18 83 • Several systematic reviews, with or without meta-analysis, have reported associations  
19 84 between ACEs and preterm birth, low birth weight, and depression/anxiety during  
20 85 pregnancy.21  
22 86 • None have investigated the association of ACEs and the risk of pregnancy  
23 87 complications including gestational diabetes, hypertensive disorder in pregnancy,  
24 88 excess gestational weight gain, depression/anxiety during pregnancy and adverse  
25 89 pregnancy outcomes such as preterm birth and preterm birth and low birth weight.  
26  
27  
28  
29  
30  
31  
32  
3334 **91 What are the new findings?**35  
36 92 • Maternal ACEs were associated with an increased risk of pregnancy complications,  
37 93 including GDM, GWG, HDP and depression/anxiety during pregnancy.38  
39 94 • ACE exposure showed a significant association with any adverse pregnancy outcome.40  
41 95 • For each additional unit increase in the number of ACEs, the odds of adverse  
42 96 pregnancy outcomes increased 1.10 times.  
43  
4445 **97 What do the new findings imply?**46  
47 98 • Preventive strategies, screening and trauma informed care need to be examined to  
48 99 improve maternal and offspring health.50  
51 100 • It may be valuable to assess the role of routine ACE screening during pregnancy to  
52 101 improve maternal and child health.  
53  
54

55 102

56  
57 103  
58  
59  
60

## 104 INTRODUCTION

105 Adverse Childhood Experiences (ACEs)<sup>1</sup> are psychosocial stressors and traumas experienced  
106 by an individual before 18 years of age<sup>2,3</sup> The pioneering study by Felitti and colleagues (1998)  
107 demonstrated that exposure to ACEs is common, ACEs co-occur and that exposure to multiple  
108 ACEs are associated with an increased risk of health risk behaviours and illnesses.<sup>4</sup>  
109 Subsequently, a growing body of research has continued to provide consistent evidence that  
110 ACEs are a major public health issue due to their high prevalence and harmful effects that  
111 ACEs have on human health throughout life.<sup>5,6</sup>

112 Early life experiences are recognized as essential determinants for health outcomes later in life  
113 especially in pregnant women and their children<sup>7</sup>. Adverse health outcomes in pregnancy can  
114 then result in intergenerational transmission of adverse health outcomes. Perhaps this occurs  
115 because women who have experienced ACEs may be a vulnerable group for development of  
116 health risk behaviours, including smoking, drug and alcohol use and sedentary lifestyle, along  
117 with consequences of trauma such as poor sleep.<sup>5</sup> These behaviours increase the risk of  
118 pregnancy complications including gestational diabetes mellitus (GDM), hypertensive disorder  
119 of pregnancy (HDP), excess gestational weight gain (GWG), depression/anxiety during  
120 pregnancy<sup>8</sup> and adverse pregnancy outcomes including low birth weight and preterm birth.<sup>9-11</sup>  
121 Systematic reviews have reported women who had experienced child maltreatment are more  
122 likely to have pregnancy complications and that physical abuse and household substance abuse  
123 were associated with greater risk of GDM<sup>12,13</sup> resulting in intergenerational transmission of  
124 adverse health outcomes. Overall, those reporting exposure to multiple ACEs (mostly 4 or  
125 more) have an increased risk of physical, mental, and substance use disorders.<sup>14</sup>

126  
127 Evidence on ACEs and the associated risk of pregnancy complications and adverse birth  
128 outcomes is inconclusive. A longitudinal study in Australia reported that women exposed to  
129 three or more ACEs had an elevated GDM risk.<sup>15</sup> In contrast, a longitudinal study from the  
130 USA reported no significant association between ACEs (for each score change and reported 4  
131 or more ACEs) and GDM.<sup>16</sup> A systematic review suggests that total ACEs (score in continuous  
132 scale) are associated with preterm birth, although this finding needs to be confirmed in other  
133 studies to explore the associations between ACEs and preterm birth using appropriate and  
134 valid instruments.<sup>17</sup> Another systematic review and meta-analysis reported that maternal  
135 history of abuse before pregnancy was significantly associated with preterm delivery and low

1  
2  
3 136 birth weight.<sup>18</sup> No systematic review and meta-analysis has investigated the association of  
4  
5 137 ACEs and the risk of pregnancy complications including GDM, HDP, GWG,  
6  
7 138 depression/anxiety during pregnancy and adverse pregnancy outcomes. This study aims to  
8  
9 139 systematically review and meta-analyse existing studies to establish the extent of association  
10  
11 140 between ACEs and pregnancy complications and adverse birth outcomes. Understanding these  
12  
13 141 associations will inform maternal clinical care and support for offspring of those women  
14  
15 142 exposed to ACEs.  
16

143

## 18 144 **METHODS**

19  
20 145 In this systematic review and meta-analysis, we followed the Preferred Reporting Items for  
21  
22 146 Systematic Reviews and Meta-Analyses Protocols (PRISMA-P) guidelines<sup>19</sup> and the Meta-  
23  
24 147 Analysis of Observational Studies in Epidemiology protocol<sup>20</sup> to ensure all necessary steps  
25  
26 148 were followed. In accordance with the guidelines, the systematic review and meta-analysis  
27  
28 149 protocol was registered in PROSPERO (CRD42021278030).  
29

150

### 31 151 *Literature search strategy*

32  
33  
34 152 Our search included studies published to July 10, 2021 using PubMed, EMBASE, CINAHL,  
35  
36 153 and PsycINFO. The search strategy employed with PubMed is: (((((((((((("adverse childhood  
37  
38 154 experiences") OR ("childhood adversities")) OR ("childhood abuse")) OR ("childhood  
39  
40 155 maltreatment")) OR ("child trauma")) OR ("adverse childhood events")) OR ("childhood  
41  
42 156 sexual abuse")) OR ("childhood physical abuse")) OR ("childhood mental abuse")) OR  
43  
44 157 ("childhood trauma")) OR ("childhood violence")) OR ("childhood hardship")) OR  
45  
46 158 ("childhood suffering")) OR ("childhood Stress")) AND (((((((((((("pregnancy  
47  
48 159 complications") OR ("Depression")) OR ("Anxiety")) OR ("Prenatal depression")) OR  
49  
50 160 ("Depressive symptoms")) OR ("Antenatal depression")) OR ("Mental health problem")) OR  
51  
52 161 ("gestational diabetes mellitus")) OR ("GDM")) OR ("hypertensive disorder of pregnancy"))  
53  
54 162 OR ("HDP")) OR ("preeclampsia")) OR ("maternal body weight")) OR ("excess weight gain"))  
55  
56 163 OR ("abnormal fetal growth")) OR ("Intrauterine growth restriction")) OR (Low birth weight))  
57  
58 164 OR (LBW)) OR (IUGR)) OR (Stillbirth)) OR (small of gestational age)) OR ("preterm birth")).  
59

165

### 59 166 *Inclusion criteria*

60



1  
2  
3 167 Studies were included if the full-text was published in English, population was pregnant  
4  
5 168 women, reported any ACEs including childhood maltreatment ( childhood physical, emotional  
6  
7 169 and sexual abuse, childhood physical and emotional neglect and exposure to parental intimate  
8  
9 170 partner violence), childhood trauma or childhood hardship/suffering and if studies reported any  
10  
11 171 pregnancy-related complications according to National Institute of Health (NIH)<sup>21</sup> (GDM,  
12  
13 172 HDP, GWG, depression/anxiety during pregnancy) and adverse birth outcomes such as low  
14  
15 173 birth weight, intra-uterine growth restriction (IUGR), preterm birth, stillbirth. Studies were  
16  
17 174 excluded if: (1) published in languages other than English; (2) included general population (not  
18  
19 175 pregnant); (3) reported reviews, qualitative studies, editorials, abstracts, case reports and letters  
20  
21 176 to the editor or (4) explored violence during pregnancy.  
22

23

### 24 178 ***Data extraction***

25 179 Two independent reviewers (TB and AAM) carried out the data extraction. If AAM and TB  
26  
27 180 did not reach agreement, the small group (AAM, TB, LC and JS) discussed discrepancies to  
28  
29 181 reach a consensus. A similar approach was used for full text reviews. Relevant data from each  
30  
31 182 of the selected studies was extracted including first author; study title; country of study; sample  
32  
33 183 size; study design; types of ACEs; measurement scale; and outcomes (both risk of pregnancy  
34  
35 184 complications and adverse pregnancy outcomes) and recorded on an Excel spreadsheet.  
36

37

### 38 186 **Quality assessment**

39  
40 187 Fifteen-point scale quality assessment tools were used to assess the quality and risk of bias of  
41  
42 188 the studies. We adapted a quality assessment tool from NIH “Quality Assessment Tool for  
43  
44 189 Observational Cohort and Cross-sectional studies”.<sup>22</sup> This tool allowed assessment of the  
45  
46 190 question, population, participation, inclusion/exclusion criteria, sample size, exposures,  
47  
48 191 timeframe, levels of exposure, independent variables, longitudinal/repeated ACEs, dependent  
49  
50 192 variable, objectively measured independent variables, objectively measured dependent  
51  
52 193 variables, lost to follow-up and confounders (**Supplementary Table 1**). The results of the  
53  
54 194 quality assessment are presented in **Supplementary Table 2**.

55 195

56 196

57

58

59

60

1  
2  
3 197 ***Data Analysis***  
4

5 198 Analyses focused on the overall association between ACEs and risk of pregnancy  
6 complications and adverse birth outcomes. Subgroup data synthesis was performed only when  
7 199 three or more studies were available with the estimates for a similar type of ACE exposures.  
8  
9 200 ACE scores were considered on the continuous scale (for each unit change) and three  
10 201 categories: i) none versus at least one ACEs; ii) one to three as low ACEs; and (iii) four or  
11 202 more as high ACEs. Although most of the studies reported the odds ratio (OR) as the  
12 203 measurement of association between exposures and outcomes, two studies reported relative  
13 204 risk (RR) and one hazard ratio (HR). We converted all measures of associations into ORs using  
14 205 conversion methods reported elsewhere.<sup>23</sup> In the meta-analysis, we used the quality effects  
15 206 model (QE)<sup>24</sup> for bias adjustment. The advantage of the QE model is that the between-study  
16 207 variability is adjusted based on the relative quality rank of the studies instead of on random  
17 208 variables assigned by the random effect (RE) model. The heterogeneity of the studies was  
18 209 reported by the I-squared value ( $I^2$ ) that measures the proportion of total variance between  
19 210 studies beyond random error.<sup>24</sup> We checked for publication bias through visualization by funnel  
20 211 plot and Doi plot.<sup>25</sup> All the analyses were conducted using the MetaXL software version 5.3.<sup>26</sup>  
21 212  
22  
23  
24  
25  
26  
27  
28  
29  
30  
31  
32  
33

34 214 ***Patient and Public Involvement***  
35  
36

37 215 No patient involved  
38  
39  
40 216  
41  
42 217  
43  
44  
45  
46  
47  
48  
49  
50  
51  
52  
53  
54  
55  
56  
57  
58  
59  
60

## 218 RESULTS

219 The literature search resulted in 1,303 records, which were screened for duplication (n=227),  
220 review of titles (n=1,076) and further abstract evaluation (n=475). Finally, 32 studies met our  
221 inclusion criteria for full text review, and 20 were included in meta-analysis (**Figure 1**). 75%  
222 of the studies (n =24) were cohort studies and the remainder were either cross sectional or case-  
223 control studies. The majority of the studies were conducted in the USA (n = 20), with fewer  
224 studies from Canada (n=3), Europe (n=5) and other regions (n=4). The study sample sizes  
225 varied from 48 to 11,556. The publication year ranged from 1994 to 2021. Thirteen studies  
226 used the 10-item ACEs questionnaire<sup>8,16,27-37</sup>, three used World Health Organization  
227 (WHO) ACE-IQ questionnaires<sup>38-40</sup> with one study used 8-items<sup>41</sup> and other study used 19-  
228 items questionnaire<sup>42</sup> and fourteen studies used other measures<sup>35,43-53</sup> (**Table-1 and 2**).

229

For peer review only

**Table 1: Characteristics of Studies included in the systematic review and meta-analysis**

| SI# | First Author/Pub Date   | Country     | Study design      | Sample size | Type of Abuse                  | Measurement scale                                                                                                                                                                                                                                                                                                                                                                                                  | Outcomes                                                                                                  |
|-----|-------------------------|-------------|-------------------|-------------|--------------------------------|--------------------------------------------------------------------------------------------------------------------------------------------------------------------------------------------------------------------------------------------------------------------------------------------------------------------------------------------------------------------------------------------------------------------|-----------------------------------------------------------------------------------------------------------|
| 1   | Christiaens/2015        | Canada      | Case-control      | 622         | ACEs                           | 10-item self-report tool developed after the original ACE study by Felliti et al                                                                                                                                                                                                                                                                                                                                   | Preterm birth                                                                                             |
| 2   | Grimstad/ 1999          | Norway      | Case-control      | 174         | Sexual Abuse                   | Were asked about the character of the experience(s):<br><ul style="list-style-type: none"> <li>• Genital Touch</li> <li>• Forced to touch the other person's genitals</li> <li>• Attempted Coitus; 4. Penile Vaginal Coitus</li> </ul>                                                                                                                                                                             | <ul style="list-style-type: none"> <li>• Preterm birth</li> <li>• Low birth weight (&lt;2500g)</li> </ul> |
| 3   | Noll/ 2007              | USA         | Cohort            | 186         | Sexual abuse                   | <ul style="list-style-type: none"> <li>• Childhood sexual abuse</li> <li>• Childhood sexual abuse experiences were additionally explored using questions modified from a questionnaire developed by Wyatt</li> </ul>                                                                                                                                                                                               | <ul style="list-style-type: none"> <li>• Preterm birth</li> <li>• Preterm birth</li> </ul>                |
| 4   | Leeners/ 2014           | Switzerland | Cohort            | 255         | Sexual abuse                   |                                                                                                                                                                                                                                                                                                                                                                                                                    |                                                                                                           |
| 5   | Selk/2016               | USA         | Case-control      | 51434       | Physical abuse<br>Sexual abuse | <ul style="list-style-type: none"> <li>• The measure of physical abuse included items from the Revised Conflict Tactics Scale (CTS)</li> <li>• The sexual abuse measure was derived from the survey by Finkelhor et al</li> </ul>                                                                                                                                                                                  | Preterm birth                                                                                             |
| 6   | Harville/2010           | UK          | Cohort            | 4865        | Violence                       | The phrase "childhood hardship" is used herein to refer to a number of adverse situations in childhood:<br><ul style="list-style-type: none"> <li>• Financial/structural hardship</li> <li>• No interest in education</li> <li>• Family dysfunction</li> <li>• Lack of supportive caregiving</li> <li>• Violence/mental health issues</li> <li>• Issues of family structure</li> <li>• No. of hardships</li> </ul> | <ul style="list-style-type: none"> <li>• Preterm birth</li> <li>• Low birth weight(&lt;2500g)</li> </ul>  |
| 7   | Appleton et al, 2019    | USA         | Cohort study      | 126         | ACEs                           | 10-item self-report tool developed after the original ACE study by Felliti et al                                                                                                                                                                                                                                                                                                                                   | Depressive symptoms during pregnancy                                                                      |
| 8   | Versteegen et al., 2021 | USA         | Cohort            | 300         | ACEs                           | 10-item self-report tool developed after the original ACE study by Felliti et al                                                                                                                                                                                                                                                                                                                                   | GDM                                                                                                       |
| 9   | Stanhope et al., 2020   | USA         | Cohort            | 2319        | ACEs                           | 10-item self-report tool developed after the original ACE study by Felliti et al                                                                                                                                                                                                                                                                                                                                   | GDM<br>HDP                                                                                                |
| 10  | Schoenaker et al., 2019 | Australia   | Cohort            | 11,556      | ACEs                           | 10-item self-report tool developed after the original ACE study by Felliti et al                                                                                                                                                                                                                                                                                                                                   | GDM                                                                                                       |
| 11  | Miller et al., 2017     | USA         | Prospective study | 744         | Childhood economic hardship    | asked women a series of questions about their family's conditions during childhood                                                                                                                                                                                                                                                                                                                                 | birth outcomes                                                                                            |
| 12  | Mersky et al., 2019     | USA         | Longitudinal      | 1848        | ACEs                           | 19-item assessment that has demonstrated good internal consistency                                                                                                                                                                                                                                                                                                                                                 | Pregnancy loss (< 20 weeks gestation)<br>preterm birth<br>low birthweight (<2500 g)                       |
| 13  | Mason et al., 2016      | USA         | Cohort            | 45,550      | Physical abuse                 | <ul style="list-style-type: none"> <li>• Physical abuse</li> <li>• Sexual abuse</li> </ul>                                                                                                                                                                                                                                                                                                                         | GDM                                                                                                       |

1  
2  
3  
4  
5  
6  
7  
8  
9  
10  
11  
12  
13  
14  
15  
16  
17  
18  
19  
20  
21  
22  
23  
24  
25  
26  
27  
28  
29  
30  
31  
32  
33  
34  
35  
36  
37  
38  
39  
40  
41  
42  
43  
44  
45  
46

|    |                         |              |                                  |       |                                                                                                                                           |                                                                                                                                                                               |                                                                                                           |
|----|-------------------------|--------------|----------------------------------|-------|-------------------------------------------------------------------------------------------------------------------------------------------|-------------------------------------------------------------------------------------------------------------------------------------------------------------------------------|-----------------------------------------------------------------------------------------------------------|
| 14 | Cammack et al., 2018    | USA          | Cohort                           | 230   | Physical abuse                                                                                                                            | Childhood Trauma Questionnaire Short-Form (CTQ)                                                                                                                               | <ul style="list-style-type: none"> <li>• Low Birth Weight (&lt;2500g)</li> <li>• Preterm Birth</li> </ul> |
| 15 | BALA et al., 2020       | Rhode Island | Population-based survey          | 3350  | ACEs                                                                                                                                      | 7-item questionnaire                                                                                                                                                          | GDM                                                                                                       |
| 16 | Ben Salah et al, 2019   | Tunisia      | Prospective follow-up study      | 593   | ACEs                                                                                                                                      | ACE-International Questionnaire (ACE-IQ)                                                                                                                                      | <ul style="list-style-type: none"> <li>• Preterm Birth</li> <li>• Low birth weight</li> </ul>             |
| 17 | Bhengu, 2019            | South Africa | cross-sectional                  | 223   | ACEs                                                                                                                                      | WHO-ACE IQ                                                                                                                                                                    | <ul style="list-style-type: none"> <li>• Preterm Birth</li> </ul>                                         |
| 18 | Gillespie et al. (2017) | USA          | Prospective observational design | 89    | Childhood stress                                                                                                                          | The Stress and Adversity Inventory (STRAIN)                                                                                                                                   | Birth timing                                                                                              |
| 19 | Leeners et al, 2014     | Switzerland  | cohort                           | 225   | CSA, physical abuse experiences, and other ACE                                                                                            | using questions modified from a questionnaire developed by Wyatt                                                                                                              | Preterm Birth                                                                                             |
| 20 | McDonnell et al, 2014   | USA          | Cohort                           | 398   | ACEs                                                                                                                                      | 10-item self-report tool developed after the original ACE study by Felitti et al                                                                                              | GDM                                                                                                       |
| 21 | Shaikh et al., 2019     | Pakistan     | Cohort                           | 300   | ACEs                                                                                                                                      | World Health Organization 31-item ACEs –International Questionnaire (ACE-I)                                                                                                   | Preterm Birth                                                                                             |
| 22 | Smith et al., 2016      | USA          | Cohort                           | 2303  | ACEs                                                                                                                                      | The main modification of the instrument was to collapse the sexual events before the age of 18 questions into 1 question asking about childhood sexual abuse prior to age 18. | <ul style="list-style-type: none"> <li>• Birth weight</li> <li>• Shorter gestational age</li> </ul>       |
| 23 | Ranchod et al, 2016     | USA          | Longitudinal study               | 2,873 | <ul style="list-style-type: none"> <li>• Physical abuse</li> <li>• Household alcohol abuse</li> <li>• Household mental illness</li> </ul> | 4-Item questionnaire                                                                                                                                                          | GWG                                                                                                       |
| 24 | Fredriksen et al, 2017  | Norway       | Cohort                           | 762   | ACEs                                                                                                                                      | 10-item self-report tool developed after the original ACE study by Felitti et al                                                                                              | <ul style="list-style-type: none"> <li>• Depression</li> <li>• Anxiety</li> </ul>                         |
| 25 | Hantsoo et al,2019      | USA          | Observational study              | 48    | ACEs                                                                                                                                      | 10-item self-report tool developed after the original ACE study by Felitti et al                                                                                              | Depression                                                                                                |
| 26 | Howell,2019             | USA          | Observational study              | 101   | ACEs                                                                                                                                      | 10-item self-report tool developed after the original ACE study by Felitti et al                                                                                              | Depression                                                                                                |
| 27 | Letourneau et al, 2019  | Canada       | Cohort                           | 907   | ACEs                                                                                                                                      | 10-item self-report tool developed after the original ACE study by Felitti et al                                                                                              | Depression                                                                                                |
| 28 | Narayan et al, 2018     | USA          | Cohort                           | 101   | ACEs                                                                                                                                      | 10-item self-report tool developed after the original ACE study by Felitti et al                                                                                              | Depression                                                                                                |
| 29 | Racine et al, 2020      | Canada       | Cohort                           | 1994  | ACEs                                                                                                                                      | 10-item self-report tool developed after the original ACE study by Felitti et al                                                                                              | Depression                                                                                                |
| 30 | Young-Wolff et al, 2019 | USA          | Cohort                           | 355   | ACEs                                                                                                                                      | 10-item self-report tool developed after the original ACE study by Felitti et al                                                                                              | Depression                                                                                                |
| 31 | Barrios et al, 2015     | USA          | Cohort                           | 1,521 | Childhood physical and sexual abuse                                                                                                       | Eight questions concerning abuse taken from the Centers for Disease Control and Prevention (CDC) Adverse Childhood Experiences Study                                          | Depression                                                                                                |

**Table 2: Summary of published measures of effect.**

| SI# | First Author/Pub Date    | Outcomes                          | Types of ACEs and analytical unit                                                                                                                                                                                                                       | Findings (OR, 95% CI)                                                                                                                                          |
|-----|--------------------------|-----------------------------------|---------------------------------------------------------------------------------------------------------------------------------------------------------------------------------------------------------------------------------------------------------|----------------------------------------------------------------------------------------------------------------------------------------------------------------|
| 1   | Christiaens et al., 2015 | Preterm birth                     | High ACE score ( $\geq 2$ ACE)<br>ACE's score (continuous)                                                                                                                                                                                              | 2.09, (1.10–3.98)<br>1.18, (0.99–1.40)                                                                                                                         |
| 2   | Grimstad et al., 1999    | Preterm birth<br>Low birth weight | Sexual Abuse<br>Sexual Abuse                                                                                                                                                                                                                            | 1.03, (0.44–2.4)<br>1.21, (0.5–2.93)                                                                                                                           |
| 3   | Noll et al., 2007        | Preterm birth                     | Sexual abuse                                                                                                                                                                                                                                            | 2.16, (0.77–6.06)                                                                                                                                              |
| 4   | Leeners et al., 2014     | Preterm birth                     | Sexual abuse                                                                                                                                                                                                                                            | 2.47, (1.11–5.51)                                                                                                                                              |
| 5   | Selk et al., 2016        | Preterm birth                     | Severe physical only<br>Forced sex only                                                                                                                                                                                                                 | 1.02, (0.88–1.17)<br>1.22, (1.1–1.35)                                                                                                                          |
| 6   | Harville et al., 2010    | Preterm birth                     | Experienced both severe abuse types<br>Financial/structural hardship<br>No interest in education<br>Family dysfunction<br>Lack of supportive caregiving<br>Violence/mental health issues<br>Issues of family structure<br>No. of hardships ( $\geq 4$ ) | 1.35, (1.13–1.62)<br>1.20 (0.90–1.60)<br>1.17 (0.93–1.48)<br>1.20 (0.94–1.52)<br>0.98 (0.81–1.19)<br>1.24 (0.94–1.63)<br>1.25 (1.02–1.54)<br>1.45 (1.09–1.93)  |
|     |                          | Low birth weight                  | Financial/structural hardship<br>No interest in education:<br>Family dysfunction<br>Lack of supportive caregiving<br>Violence/mental health issues<br>Issues of family structure<br>No. of hardships ( $\geq 4$ )                                       | 1.18 (0.88–1.60)<br>1.18 (0.88–1.60)<br>1.18 (0.88–1.60)<br>1.18 (0.88–1.60)<br>1.48 (1.12–1.96)<br>1.48 (1.12–1.96)<br>1.48 (1.12–1.96)                       |
| 7   | Appleton et al., 2019    | Depression                        | ACE's score (continuous)                                                                                                                                                                                                                                | Pearson's correlations coefficients (0.37)                                                                                                                     |
| 8   | Versteegen et al., 2021  | GDM                               | ACEs total<br>ACEs binary                                                                                                                                                                                                                               | 1.00 (0.84, 1.18)<br>1.31 (0.50, 3.39)                                                                                                                         |
| 9   | Stanhope et al., 2020    | GDM<br>HDP                        | ACEs 4+<br>Continuous ACE score<br>ACEs 4+<br>Continuous ACE score:                                                                                                                                                                                     | 1.03 (0.71, 1.49)<br>0.96 (0.88, 1.04)<br>1.03 (0.71, 1.49)<br>1.03 (0.71, 1.49)                                                                               |
| 10  | Schoenaker et al., 2019  | GDM                               | Three ACEs<br>Four or more ACEs                                                                                                                                                                                                                         | 1.73, (1.02, 3.01)<br>1.76, (1.04, 2.99)                                                                                                                       |
| 11  | Miller et al., 2017      | Birth outcomes                    | Childhood economic hardship                                                                                                                                                                                                                             | Mother's hardship independently associated with multiple adverse birth outcomes                                                                                |
| 12  | Mersky et al., 2019      | Preterm birth<br>Low birthweight  | ACE scores (continuous)<br>1 or 2 ACEs<br>3 or 4 ACEs<br>5 or more ACEs<br>ACE scores (continuous)<br>1 or 2 ACEs<br>3 or 4 ACEs<br>5 or more ACEs                                                                                                      | 1.07, (1.01–1.12)<br>1.22 (0.79–1.89)<br>1.29 (0.82–2.02)<br>1.46 (0.95–2.26)<br>1.08, (1.03–1.15)<br>0.98 (0.62–1.56)<br>1.22 (0.76–1.96)<br>1.39 (0.88–2.19) |
|     |                          | Pregnancy loss                    | ACE scores (continuous)<br>1 or 2 ACEs<br>3 or 4 ACEs                                                                                                                                                                                                   | 1.12, (1.08–1.17)<br>0.93 (0.66–1.31)<br>1.27 (0.89–1.80)                                                                                                      |

1  
2  
3  
4  
5  
6  
7  
8  
9  
10  
11  
12  
13  
14  
15  
16  
17  
18  
19  
20  
21  
22  
23  
24  
25  
26  
27  
28  
29  
30  
31  
32  
33  
34  
35  
36  
37  
38  
39  
40  
41  
42  
43  
44  
45  
46

|    |                                |                                          |                          |                                                                                                                                                                                                                                                           |
|----|--------------------------------|------------------------------------------|--------------------------|-----------------------------------------------------------------------------------------------------------------------------------------------------------------------------------------------------------------------------------------------------------|
|    |                                |                                          | 5 or more ACEs           | 1.27 (0.89–1.80)                                                                                                                                                                                                                                          |
| 13 | Mason et al., 2016             | GDM                                      | Mild physical abuse      | 1.08 (0.96, 1.22)                                                                                                                                                                                                                                         |
|    |                                |                                          | Moderate physical abuse  | 11.16 (1.04, 1.29)                                                                                                                                                                                                                                        |
|    |                                |                                          | Severe physical abuse    | 1.42 (1.21, 1.66)                                                                                                                                                                                                                                         |
|    |                                |                                          | Forced sexual activity   | 1.30 (1.14, 1.49)                                                                                                                                                                                                                                         |
|    |                                |                                          | Combine                  | 1.42, (1.21, 1.66)                                                                                                                                                                                                                                        |
| 14 | Cammack et al., 2018           | Low Birth Weight                         | Emotional Abuse          | 0.88 (0.66–1.00) Cohen’s Kappas (95% CI)                                                                                                                                                                                                                  |
|    |                                |                                          | Physical Abuse           | 0.50 (0.01–0.99)                                                                                                                                                                                                                                          |
|    |                                |                                          | Sexual Abuse             | 0.75 (0.43–1.00)                                                                                                                                                                                                                                          |
|    |                                |                                          | Emotional Neglect        | 0.59 (0.18–1.00)                                                                                                                                                                                                                                          |
|    |                                |                                          | Physical Neglect         | 0.28 (–0.16–0.73)                                                                                                                                                                                                                                         |
|    |                                | Preterm Birth                            | Emotional Abuse          | 0.78 (0.55–1.00)                                                                                                                                                                                                                                          |
|    |                                |                                          | Physical Abuse           | 0.69 (0.36–1.00)                                                                                                                                                                                                                                          |
|    |                                |                                          | Sexual Abuse             | 0.78 (0.55–1.00)                                                                                                                                                                                                                                          |
|    |                                |                                          | Emotional Neglect        | 0.44 (0.12–0.77)                                                                                                                                                                                                                                          |
|    |                                |                                          | Physical Neglect         | 0.39 (–0.03–0.81)                                                                                                                                                                                                                                         |
|    |                                | NICU Admission                           | Emotional Abuse          | 0.58 (0.25–0.91)                                                                                                                                                                                                                                          |
|    |                                |                                          | Physical Abuse           | 0.28 (–0.15–0.71)                                                                                                                                                                                                                                         |
|    |                                |                                          | Sexual Abuse             | 0.73 (0.45–1.00)                                                                                                                                                                                                                                          |
|    |                                |                                          | Emotional Neglect        | 0.55 (0.20–0.90)                                                                                                                                                                                                                                          |
|    |                                |                                          | Physical Neglect         | 0.55 (0.20–0.90)                                                                                                                                                                                                                                          |
| 15 | BALA et al., 2020              | GDM                                      | 3 or more ACEs           | 1.24, (0.81–1.90)                                                                                                                                                                                                                                         |
|    |                                |                                          | 1–2 ACEs                 | 1.18, (0.90– 1.55)                                                                                                                                                                                                                                        |
| 16 | Ben Salah et al, 2019          | Preterm Birth<br>Low birth weight        | ACEs continuous          | After adjustment for high-risk pregnancies, environmental tobacco smoke, and intra-familial ACEs, the risk of premature birth was significantly associated with exposure to collective violence (P < 0.001) and witnessing community violence (P < 0.05). |
| 17 | Bhengu et al., 2019            | Preterm Birth                            | ACEs continuous          | 1.21, (1.03-1.43)                                                                                                                                                                                                                                         |
| 18 | Gillespie et al. (2017)        | Birth timing                             | ACEs continuous          | Cumulative childhood stress predicted birth timing (p = 0.01).                                                                                                                                                                                            |
| 19 | Leeners et al, 2014            | Preterm Birth                            |                          | CSA, physical abuse as well as other ACE were associated with an increased risk for premature delivery                                                                                                                                                    |
| 20 | McDonnell et al, 2014          | GDM                                      |                          | GDM not correlated with ACE indicators                                                                                                                                                                                                                    |
| 21 | Shaikh et al., 2019            | Preterm Birth                            | ACEs continuous          | We found no association between ACE and preterm birth                                                                                                                                                                                                     |
| 22 | Smith et al., 2016             | Birth weight and shorter gestational age | ACEs continuous          | Each additional ACE decreased birth weight by 16.33 g and decreased gestational age by 0.063.                                                                                                                                                             |
| 23 | Ranchod et al, 2016            | GWG                                      | Physical abuse           | 1.2, (1.1-1.4)                                                                                                                                                                                                                                            |
|    |                                |                                          | Household alcohol abuse  | 1.2, (1.1-1.3)                                                                                                                                                                                                                                            |
|    |                                |                                          | Household mental illness | 1.1, (0.9-1.2)                                                                                                                                                                                                                                            |
| 24 | Fredriksen et al., 2017        | Depression                               | ACEs continuous          | 1.3, (0.92-1.82)                                                                                                                                                                                                                                          |
| 25 | Hantsoo et al.,2019            | Depression                               | < 2 ACEs                 | EPDS (Median [IQR]): 5 [3, 6]                                                                                                                                                                                                                             |
|    |                                |                                          | 2 or more ACEs           | EPDS (Median [IQR]): 3 [1.5, 6.0]                                                                                                                                                                                                                         |
| 26 | Howell et al., 2020            | Depression                               | ACEs continuous          | Adverse childhood experiences had a direct effect on depression, B=1.11, standard error=.44, p=.01,                                                                                                                                                       |
| 27 | Letourneau et al, 2019         | Depression                               | ACEs continuous          | Maternal ACEs were associated with symptoms of anxiety and depression during pregnancy                                                                                                                                                                    |
| 28 | Narayan et al et al., 2018     | Depression                               | ACEs continuous          | Maternal ACEs were associated with depression during pregnancy (β = 0.32, p < 0.01).                                                                                                                                                                      |
| 29 | Racine et al et al., 2020      | Depression                               | ACEs continuous          | 1.26, (1.12-1.43)                                                                                                                                                                                                                                         |
| 30 | Young-Wolff et al et al., 2019 | Depression                               | 3+ ACEs                  | 3.08, (1.12-7.39)                                                                                                                                                                                                                                         |
|    |                                |                                          | 1–2 ACEs                 | 2.42 (1.09–5.41)                                                                                                                                                                                                                                          |
| 31 | Barrios et al., 2015           | Depression                               |                          | Depression: OR: 2.07; 95% CI: 1.58-2.71                                                                                                                                                                                                                   |

### ***ACEs and risk of pregnancy complications***

*ACEs and GDM:* Six studies<sup>8,16,35,36,50,54</sup> described an association between ACEs and GDM and only one study reported there was no association between ACEs and GDM [42]. A large epidemiological study in Australia<sup>54</sup> reported that, in pregnant women, exposure to any three ACEs (adjusted relative risk, aRR=1.7, 95% CI:1.0, 3.0) or four or more ACEs (aRR=1.7, 95% CI:1.0, 2.9) was associated with elevated GDM risk after adjusting preconception BMI, unhealthy diet, parity, and maternal age.. Another study in the USA by Mason et al., 2016<sup>35</sup> reported that both moderate (adjusted odds ratio, aOR=1.1, 95% CI:1.0, 1.2) and severe (aOR=1.42, 95% CI:1.2, 1.6) childhood physical abuse was associated with an increased risk of GDM. This study also reported that forced sexual activity during childhood was associated with an increased risk of GDM (aOR 1.3, 95% CI:1.1, 1.4).

### ***ACEs, GWG and HDP***

Only one study by Ranchod et al., 2016<sup>53</sup> examined the association between ACEs and GWG. They found that exposure to physical abuse and household alcohol abuse were independently associated with a 20% increase in the risk of excessive GWG. A study by Stanhope et al., 2020<sup>8</sup> found that for each ACEs score there was a slight increase in the HDP risk (aOR=1.0, 95% CI:0.9, 1.1), although it was not statistically significant. However, they found that physical abuse (aOR= 1.2, 95% CI: 1.1-1.4) and household alcohol abuse (aOR= 1.2, 95% CI: 1.1-1.3) were associated with a significant increase in the risk of excessive GWG.

### ***ACEs and depression/anxiety***

Nine studies<sup>27-33,37,41</sup> examined the association between ACEs and depression/anxiety with almost all studies reporting a significant positive association during pregnancy. For example, a large cohort study in Canada by Racine et al, 2020<sup>32</sup> reported that ACEs were associated with depressive symptoms in pregnancy (aOR =1.2, 95% CI :1.1–1.4). Another study by Letourneau et al, 2019<sup>30</sup> reported that for each maternal ACE, there was an increased risk of symptoms of anxiety and depression during pregnancy. An observational study in the USA by Hantsoo et al<sup>28,29</sup> reported that ACEs directly affected depression (B=1.1, standard error=.44, p=.01).

### ***Meta-analytic results for maternal ACEs and risk of pregnancy complications***

A total of 11 studies (72,889 participants) were available for the quality-effect meta-analysis, which produced an association between maternal any ACEs and risk of any adverse pregnancy complications (OR=1.3, 95% CI: 1.1-1.4) (Figure-2). In risk factor-specific sub-analysis, five studies (7116 participants) were available for meta-analysis, which produced a moderate association between maternal ACEs and risk of GDM (OR=1.2, 95% CI: 0.9-1.5). For depression/anxiety during pregnancy, four studies (6116 participants) were available for this meta-analysis, which produced an association between maternal ACEs and risk of depression/anxiety during pregnancy (OR=1.5, 95% CI: 1.15-2.2). Both low (OR=1.3, 95% CI: 1.1-1.5) and high (OR=1.4, 95% CI: 1.0-1.9) number of ACEs were associated with and any pregnancy complications (supplementary figure- 1.1). For every single unit increase of ACEs, the odds of pregnancy complications increased 1.12 times (OR=1.1, 95% CI: 0.9-1.3) (supplementary figure- 1.3).



### ***ACEs and adverse pregnancy outcomes***

*ACEs and preterm birth:* Out of 31 studies, 11 34,38,40,42-47,49,55 reported the association between ACEs and preterm birth. A study in Tunisia by Ben Salah et al. (2019) reported that after adjustment for high-risk pregnancies, environmental tobacco smoke, and intra-familial ACEs, the risk of premature birth was significantly associated with exposure to collective violence (P-value < 0.001) and witnessing community violence (P-value < 0.05). In another study, Harville et al<sup>47</sup> reported that violence exposure during childhood was associated with a 44% increased risk of preterm birth (adjusted RR= 1.4; 95% CI: 1.0-1.9). They also found the family mental health issues increased by 24%, and a 25% increase in the risk of preterm birth. A case-control study in the USA by Selk et al<sup>46</sup> reported that women exposed to forced sex during childhood had a 22% greater risk of preterm birth (adjusted RR=1.2, 95% CI: 1.1-1.3) than those in the no exposure group. Furthermore, exposure to physical and sexual abuse during childhood was associated with a 35% greater risk of preterm birth (adjusted RR=1.3, 95% CI: 1.1-1.6). A study by Miller et al., reported that mothers' childhood economic hardship was independently associated with multiple adverse birth outcomes.<sup>48</sup> A study by Gillespie et al reported that maternal childhood abuse was associated with birth timing. <sup>51</sup>

### ***ACEs and low birth weight***

Out of 31 studies, six 38,42,43,47,49,52 reported an association between ACEs and low birth weight. Harville et al reported that violence exposure during childhood was associated with an increased risk of low birth weight (adjusted OR= 1.5; 95% CI: 1.1-2.0). They also found that violence/mental health issues (adjusted OR=1.4, 95% CI:1.1-1.9) and issues of family structure increased the risk of low birth weight (adjusted OR=1.4, 95% CI:1.1-1.9). A study by Smith et al. reported that each additional ACE decreased gestational age at birth as well as birth weight. <sup>52</sup>

### ***Meta-analytic results for maternal ACEs and adverse pregnancy outcomes***

A total of 12 studies were available for this quality-effects meta-analysis, which produced an association between maternal ACEs and any adverse pregnancy outcomes (OR=1.2, 95% CI: 1.1-1.3). In a sub-analysis of eight studies (59,607 participants), the quality-effects meta-analysis showed an association between maternal ACEs and preterm birth (OR=1.2, 95% CI: 1.1-1.2). On the other hand, three studies (7,014 participants) were available for the quality-effects meta-analysis for low birth weight, which showed an association between maternal ACEs and low birth weight (OR=1.2, 95% CI: 1.1-1.3) (Figure-3). In low (one to three ACEs) and high (four+) ACEs specific analysis, five studies reported low ACEs exposure and nine studies reported high ACEs exposure. Both low (OR=1.2, 95% CI: 1.0-1.5) and high (OR=1.3, 95% CI: 1.1-1.6) ACE exposure showed a significant association with any adverse pregnancy outcome (supplementary figure- 2). For each additional unit increase in the number of ACEs, the odds of adverse pregnancy outcomes increased 1.10 times (OR=1.1, 95% CI: 1.0-1.1) (supplementary Figure 2.3).

## DISCUSSION

This systematic review and meta-analysis found that maternal ACEs were associated with an increased risk of pregnancy complications, including GDM, GWG, HDP and depression/anxiety during pregnancy. To our knowledge, this is the first systematic review, and meta-analysis to assess the association between ACEs and pregnancy complications. One previous systematic review and meta-analysis reported an association between ACEs and maternal mental health problems.<sup>22</sup> There could be many potential mechanisms to explain the relationship between ACEs and adverse pregnancy outcomes. Results from animal models<sup>56,57</sup> and longitudinal human studies such as the Nurses' Health Study have proposed that a strong history of ACEs may alter hypothalamic-pituitary-adrenal axis as reflected by elevated cortisol levels that in turn alter glucose metabolism and body weight regulation.<sup>35</sup> Brain development begins in fetal life and continues into early adulthood. Early life maternal ACEs alter the structure and function of the brain.<sup>58,59</sup> These neurodevelopmental alterations may result in neuroendocrine disruption of cortisol regulation, linked to glucose metabolism.<sup>60,61</sup> The limbic system is connected to the autonomic nervous system reactivity generating a fight/flight response resulting in cortisol secretion with immune, endocrine, metabolic and cardiovascular consequences. ACEs may alter stress regulatory pathways, resulting in long-term altered responses to stress.<sup>62</sup> Exposure to ACEs are also associated with an increased risk of health risk behaviours including substance use, physical inactivity and unhealthy diet.<sup>4</sup> Previous research has shown that ACEs are associated with pre-pregnancy obesity.<sup>63</sup> Any of these mechanisms could explain the transgenerational nature of obesity and diabetes in families affected by maternal ACEs. Chronic inflammation, unhealthy behaviours, poor sleep and altered stress regulatory pathways are risk factors for adverse pregnancy complications, including GDM, HDP and depression/anxiety.<sup>64,65</sup>

We also found that maternal ACEs are positively associated with adverse pregnancy outcomes, including preterm birth and low birth weight. Our results are more comprehensive than previous systematic reviews<sup>66 67 18</sup> due to the availability of 12 recent primary studies. Previously published literature has suggested that the experience of ACEs increases the risk of physical or sexual abuse during pregnancy and is associated with placental damage, uterine contractions, premature rupture of membranes, and genitourinary infections which ultimately increase the risk of preterm birth and low birth weight.<sup>68</sup> Another possible explanation for the observed associations between ACEs and pregnancy outcomes is that a maternal history of abuse before pregnancy and maternal experience of abuse and other stressors during a lifetime contribute to an individual's allostatic load.<sup>69,70</sup> When the allostatic load exceeds a threshold level, vulnerability for disease is increased 4, which may include adverse pregnancy outcomes.

71

According to our findings and other systematic review evidence, it may be valuable to assess the role of routine ACE screening during pregnancy to improve maternal and child health. Trauma informed care is not well incorporated into clinical practice guidelines. Much of the emphasis in maternity care is on individual behaviour change, including advice about diet, exercise, smoking cessation and uptake of clinical care. Approaches that do not incorporate the personal experiences of trauma by women attending antenatal services may inadvertently cause iatrogenic harm. For many years, there has been an interest in improving pregnancy outcomes by focusing on a limited set of physical parameters that can easily be measured such as gestational weight gain, without attention to the underlying mechanisms.<sup>72,73</sup> Overall, studies of diet and exercise in pregnancy to reduce GDM, HDP and other adverse pregnancy outcomes have been disappointing.<sup>74</sup> A recent scoping review by Mishra et al<sup>75</sup> found that ACEs screening does not excessively disrupt clinic workflow. Furthermore, they reported that ACEs

1  
2  
3 screening is both acceptable for the patient and feasible for the provider. However, to determine  
4 if screening for ACEs is worthwhile, studies would need to be undertaken to assess if trauma  
5 informed clinical care translates to improved clinical outcomes for mother and offspring.<sup>76</sup>  
6

7  
8 There are some limitations to the current study, which reduce the generalisability of the  
9 findings. Firstly, most of the included studies are from high-income western countries.  
10 Secondly, due to the lack of data, we could not conduct the ACEs item-specific analysis.  
11 Thirdly, the dose-response relationship in all studies could not be assessed as different studies  
12 use different screening tools and cut-off values. Only five studies exploring pregnancy  
13 complications and five studies investigating adverse pregnancy outcomes could be assessed for  
14 a dose response relationship. Lastly, as we considered various types of ACE exposures in a  
15 single review, we expected much heterogeneity in the study methodologies, populations,  
16 exposures, and outcome identification. To address these limitations, the Quality Effect model,  
17 which incorporates the heterogeneity of effects across the studies and reduces the risk-of-bias  
18 assessment was used in the meta-analysis. Nevertheless, our study has several strengths  
19 considering the comprehensive nature of the inclusion criteria, including relevant studies  
20 published up to July 2021. In addition, we assessed the methodological quality of studies using  
21 standard tools appropriate for observational cohort and cross-sectional studies.  
22  
23  
24  
25

## 26 **CONCLUSION**

27  
28 In conclusion, this systematic review and meta-analysis found that exposure to ACEs increases  
29 the risk of pregnancy complications and adverse pregnancy outcomes. Identification of women  
30 exposed to ACEs and personalising their care may provide opportunities to improve maternal  
31 and offspring mental and physical health.  
32  
33

## 34 **Acknowledgments**

35  
36 This research was partially supported by the Australian Research Council Centre of  
37 Excellence for Children and Families over the Life Course.  
38  
39  
40

## 41 **Contributors**

42  
43 AAM and TB contributed towards literature search, data analysis and interpretation, figures  
44 and tables, and writing of the manuscript. AAM, TB, LC, JS, PS contributed towards the  
45 drafting of the protocol, review of the study design, data collection and interpretation and  
46 provided a critical review of the manuscript. AAM and SD contributed towards data  
47 management and analysis plan and provided oversight and interpretation of the analyses. AAM,  
48 DM, KT, FB, MN, MM, KM, AK, LH contributed towards the study design and editing. AAM  
49 and LC contributed towards the design of the manuscript, development of the protocol, and  
50 critical evaluation and interpretation of the results and critical review of the manuscript.  
51  
52

53 **Funding** No funding

54 **Disclaimer** No disclaimer

55 **Competing interests** All authors declare no competing interests.

56 **Patient consent for publication** Not required.  
57  
58  
59  
60

1  
2  
3 **Ethics approval and consent to participate** Not applicable.  
4

5 **Data availability statement** Data are available in a public and open access repository. All  
6 data analysed or produced in the study are included in the article or uploaded as supplemental  
7 files.  
8  
9  
10  
11  
12  
13  
14  
15  
16  
17  
18  
19  
20  
21  
22  
23  
24  
25  
26  
27  
28  
29  
30  
31  
32  
33  
34  
35  
36  
37  
38  
39  
40  
41  
42  
43  
44  
45  
46  
47  
48  
49  
50  
51  
52  
53  
54  
55  
56  
57  
58  
59  
60

For peer review only

## References

1. Atzl VM, Narayan AJ, Rivera LM, Lieberman AF. Adverse childhood experiences and prenatal mental health: Type of ACEs and age of maltreatment onset. *Journal of family psychology* 2019; **33**(3): 304.
2. Hughes K, Bellis MA, Hardcastle KA, et al. The effect of multiple adverse childhood experiences on health: a systematic review and meta-analysis. *The Lancet Public Health* 2017; **2**(8): e356-e66.
3. Wickramasinghe YM, Raman S, Garg P, Hurwitz R. Burden of adverse childhood experiences in children attending paediatric clinics in South Western Sydney, Australia: a retrospective audit. *BMJ paediatrics open* 2019; **3**(1).
4. Felitti VJ, Anda RF, Nordenberg D, et al. Relationship of childhood abuse and household dysfunction to many of the leading causes of death in adults: The Adverse Childhood Experiences (ACE) Study. *American journal of preventive medicine* 1998; **14**(4): 245-58.
5. Petrucci K, Davis J, Berman T. Adverse childhood experiences and associated health outcomes: A systematic review and meta-analysis. *Child abuse & neglect* 2019; **97**: 104127.
6. Schroeder K, Schuler BR, Kobulsky JM, Sarwer DB. The association between adverse childhood experiences and childhood obesity: A systematic review. *Obesity Reviews* 2021; **22**(7): e13204.
7. Kuh D, Ben-Shlomo Y, Lynch J, Hallqvist J, Power C. Life course epidemiology. *Journal of epidemiology and community health* 2003; **57**(10): 778.
8. Stanhope KK, Cammack AL, Perreira KM, et al. Adverse childhood experiences and lifetime adverse maternal outcomes (gestational diabetes and hypertensive disorders of pregnancy) in the Hispanic Community Health Study/Study of Latinos. *Annals of Epidemiology* 2020; **50**: 1-6.
9. Schetter CD, Tanner L. Anxiety, depression and stress in pregnancy: implications for mothers, children, research, and practice. *Current opinion in psychiatry* 2012; **25**(2): 141.
10. Olsen JM. Integrative review of pregnancy health risks and outcomes associated with adverse childhood experiences. *Journal of Obstetric, Gynecologic & Neonatal Nursing* 2018; **47**(6): 783-94.
11. Dachew BA, Mamun A, Maravilla JC, Alati R. Association between hypertensive disorders of pregnancy and the development of offspring mental and behavioural problems: a systematic review and meta-analysis. *Psychiatry research* 2018; **260**: 458-67.
12. Montgomery E, Pope C, Rogers J. A feminist narrative study of the maternity care experiences of women who were sexually abused in childhood. *Midwifery* 2015; **31**(1): 54-60.
13. Montgomery E, Pope C, Rogers J. The re-enactment of childhood sexual abuse in maternity care: a qualitative study. *BMC pregnancy and childbirth* 2015; **15**(1): 1-7.
14. Lê-Scherban F, Wang X, Boyle-Steed KH, Pachter LM. Intergenerational associations of parent adverse childhood experiences and child health outcomes. *Pediatrics* 2018; **141**(6).
15. Schoenaker DA, Callaway LK, Mishra GD. The role of childhood adversity in the development of gestational diabetes. *American journal of preventive medicine* 2019; **57**(3): 302-10.
16. Versteegen M, Bozlak CT, Larkin H, Appleton AA. Maternal depression, adverse childhood experiences, and social support in relation to gestational diabetes risk: results from the Albany Infant and Mother Study (AIMS). *BMC Pregnancy and Childbirth* 2021; **21**(1): 1-7.
17. Sulaiman S, Premji SS, Tavangar F, Yim IS, Lebold M. Total Adverse Childhood Experiences and Preterm Birth: A Systematic Review. *Maternal and Child Health Journal* 2021: 1-14.

18. Nesari M, Olson JK, Vandermeer B, Slater L, Olson DM. Does a maternal history of abuse before pregnancy affect pregnancy outcomes? A systematic review with meta-analysis. *BMC pregnancy and childbirth* 2018; **18**(1): 1-11.
19. Shamseer L, Moher D, Clarke M, et al. Preferred reporting items for systematic review and meta-analysis protocols (PRISMA-P) 2015: elaboration and explanation. *Bmj* 2015; **349**.
20. Stroup DF, Berlin JA, Morton SC, et al. Meta-analysis of observational studies in epidemiology: a proposal for reporting. *Jama* 2000; **283**(15): 2008-12.
21. <https://www.nichd.nih.gov/health/topics/pregnancy>.
22. Racine N, Devereaux C, Cooke JE, Eirich R, Zhu J, Madigan S. Adverse childhood experiences and maternal anxiety and depression: a meta-analysis. *BMC psychiatry* 2021; **21**(1): 1-10.
23. Shor E, Roelfs D, Vang ZM. The “Hispanic mortality paradox” revisited: meta-analysis and meta-regression of life-course differentials in Latin American and Caribbean immigrants' mortality. *Social Science & Medicine* 2017; **186**: 20-33.
24. Borenstein M, Higgins JPT, Hedges LV, Rothstein HR. Basics of meta-analysis: I2 is not an absolute measure of heterogeneity. *Research synthesis methods* 2017; **8**(1): 5-18.
25. Furuya-Kanamori L, Barendregt JJ, Doi SAR. A new improved graphical and quantitative method for detecting bias in meta-analysis. *International journal of evidence-based healthcare* 2018; **16**(4): 195-203.
26. Barendregt JJ, Doi SA. MetaXL user guide version 5.3. *EpiGear International Pty Ltd* 2016.
27. Fredriksen E, von Soest T, Smith L, Moe V. Patterns of pregnancy and postpartum depressive symptoms: Latent class trajectories and predictors. *Journal of Abnormal Psychology* 2017; **126**(2): 173.
28. Hantsoo L, Jašarević E, Criniti S, et al. Childhood adversity impact on gut microbiota and inflammatory response to stress during pregnancy. *Brain, behavior, and immunity* 2019; **75**: 240-50.
29. Howell KH, Miller-Graff LE, Schaefer LM, Scrafford KE. Relational resilience as a potential mediator between adverse childhood experiences and prenatal depression. *Journal of health psychology* 2020; **25**(4): 545-57.
30. Letourneau N, Dewey D, Kaplan BJ, et al. Intergenerational transmission of adverse childhood experiences via maternal depression and anxiety and moderation by child sex. *Journal of developmental origins of health and disease* 2019; **10**(1): 88-99.
31. Narayan AJ, Rivera LM, Bernstein RE, Harris WW, Lieberman AF. Positive childhood experiences predict less psychopathology and stress in pregnant women with childhood adversity: A pilot study of the benevolent childhood experiences (BCEs) scale. *Child abuse & neglect* 2018; **78**: 19-30.
32. Racine N, Zumwalt K, McDonald S, Tough S, Madigan S. Perinatal depression: the role of maternal adverse childhood experiences and social support. *Journal of affective disorders* 2020; **263**: 576-81.
33. Young-Wolff KC, Alabaster A, McCaw B, et al. Adverse childhood experiences and mental and behavioral health conditions during pregnancy: the role of resilience. *Journal of Women's Health* 2019; **28**(4): 452-61.
34. Christiaens I, Hegadoren K, Olson DM. Adverse childhood experiences are associated with spontaneous preterm birth: a case-control study. *BMC medicine* 2015; **13**(1): 1-9.
35. Mason SM, Tobias DK, Clark CJ, Zhang C, Hu FB, Rich-Edwards JW. Abuse in Childhood or Adolescence and Gestational Diabetes: a retrospective cohort study. *American journal of preventive medicine* 2016; **50**(4): 436-44.

- 1  
2  
3 36· McDonnell CG, Valentino K· Intergenerational effects of childhood trauma: evaluating  
4 pathways among maternal ACEs, perinatal depressive symptoms, and infant outcomes· *Child*  
5 *maltreatment* 2016; **21**(4): 317-26·
- 6 37· Appleton AA, Kiley K, Holdsworth EA, Schell LM· Social support during pregnancy  
7 modifies the association between maternal adverse childhood experiences and infant birth size·  
8 *Maternal and child health journal* 2019; **23**(3): 408-15·
- 9 38· Salah AB, Lemieux A, Mlouki I, et al· Impact of social violence and childhood  
10 adversities on pregnancy outcomes: a longitudinal study in Tunisia· *Journal of global health*  
11 2019; **9**(2)·
- 12 39· Bhengu BS, Tomita A, Mashaphu S, Paruk S· The role of adverse childhood  
13 experiences on perinatal substance use behaviour in KwaZulu-Natal Province, South Africa·  
14 *AIDS and Behavior* 2020; **24**(6): 1643-52·
- 15 40· Shaikh K, Premji SS, Lalani S, et al· Ethnic disparity and exposure to supplements  
16 rather than adverse childhood experiences linked to preterm birth in Pakistani women· *Journal*  
17 *of Affective Disorders* 2020; **267**: 49-56·
- 18 41· Barrios YV, Gelaye B, Zhong Q, et al· Association of childhood physical and sexual  
19 abuse with intimate partner violence, poor general health and depressive symptoms among  
20 pregnant women· *PloS one* 2015; **10**(1): e0116609·
- 21 42· Mersky JP, Lee CP· Adverse childhood experiences and poor birth outcomes in a  
22 diverse, low-income sample· *BMC pregnancy and childbirth* 2019; **19**(1): 1-7·
- 23 43· Grimstad H, Schei B· Pregnancy and delivery for women with a history of child sexual  
24 abuse· *Child abuse & neglect* 1999; **23**(1): 81-90·
- 25 44· Noll JG, Schulkin J, Trickett PK, Susman EJ, Breech L, Putnam FW· Differential  
26 pathways to preterm delivery for sexually abused and comparison women· *Journal of pediatric*  
27 *psychology* 2007; **32**(10): 1238-48·
- 28 45· Leeners B, Rath W, Block E, Görres G, Tschudin S· Risk factors for unfavorable  
29 pregnancy outcome in women with adverse childhood experiences· *Journal of Perinatal*  
30 *Medicine* 2014; **42**(2): 171-8·
- 31 46· Selk SC, Rich-Edwards JW, Koenen K, Kubzansky LD· An observational study of  
32 type, timing, and severity of childhood maltreatment and preterm birth· *J Epidemiol*  
33 *Community Health* 2016; **70**(6): 589-95·
- 34 47· Harville EW, Boynton-Jarrett R, Power C, Hyppönen E· Childhood hardship, maternal  
35 smoking, and birth outcomes: a prospective cohort study· *Archives of pediatrics & adolescent*  
36 *medicine* 2010; **164**(6): 533-9·
- 37 48· Miller GE, Culhane J, Grobman W, et al· Mothers' childhood hardship forecasts  
38 adverse pregnancy outcomes: role of inflammatory, lifestyle, and psychosocial pathways·  
39 *Brain, behavior, and immunity* 2017; **65**: 11-9·
- 40 49· Cammack AL, Hogue CJ, Drews-Botsch CD, et al· An exploratory study of whether  
41 pregnancy outcomes influence maternal self-reported history of child maltreatment· *Child*  
42 *abuse & neglect* 2018; **85**: 145-55·
- 43 50· Bala K, Monteiro K, Martha K, High P· The Association between Adverse Childhood  
44 Experiences and Diabetes Status during Pregnancy among Women in Rhode Island, 2016-  
45 2018· *Rhode Island Medical Journal* 2020; **103**(9): 52-5·
- 46 51· Gillespie SL, Christian LM, Alston AD, Salsberry PJ· Childhood stress and birth timing  
47 among African American women: Cortisol as biological mediator· *Psychoneuroendocrinology*  
48 2017; **84**: 32-41·
- 49 52· Smith MV, Gotman N, Yonkers KA· Early childhood adversity and pregnancy  
50 outcomes· *Maternal and child health journal* 2016; **20**(4): 790-8·
- 51  
52  
53  
54  
55  
56  
57  
58  
59  
60

- 1  
2  
3 53· Ranchod YK, Headen IE, Petito LC, Deardorff JK, Rehkopf DH, Abrams BF· Maternal  
4 childhood adversity, prepregnancy obesity, and gestational weight gain· *American journal of*  
5 *preventive medicine* 2016; **50**(4): 463-9·
- 6 54· Schoenaker DAJM, Callaway LK, Mishra GD· The Role of Childhood Adversity in the  
7 Development of Gestational Diabetes· *American Journal of Preventive Medicine* 2019; **57**(3):  
8 302-10·
- 9 55· Bhengu BS, Tomita A, Mashaphu S, Paruk S· The role of adverse childhood  
10 experiences on perinatal substance use behaviour in KwaZulu-Natal Province, South Africa·  
11 *AIDS and Behavior* 2019: 1-10·
- 12 56· Sadeghimahalli F, Zardooz H, Golchoobian R· Early postnatal hypothalamic-pituitary-  
13 adrenal axis activity and reduced insulin sensitivity in adult rats· *Endocrine regulations* 2019;  
14 **53**(4): 213-20·
- 15 57· Chen Y-T, Hu Y, Yang Q-Y, et al· Excessive glucocorticoids during pregnancy impair  
16 fetal brown fat development and predispose offspring to metabolic dysfunctions· *Diabetes*  
17 2020; **69**(8): 1662-74·
- 18 58· Bick J, Nelson CA· Early adverse experiences and the developing brain·  
19 *Neuropsychopharmacology* 2016; **41**(1): 177-96·
- 20 59· Kornmeier J, Bach M· Ambiguous figures—what happens in the brain when perception  
21 changes but not the stimulus· *Frontiers in human neuroscience* 2012; **6**: 51·
- 22 60· Nusslock R, Miller GE· Early-life adversity and physical and emotional health across  
23 the lifespan: A neuroimmune network hypothesis· *Biological psychiatry* 2016; **80**(1): 23-32·
- 24 61· Danese A, McEwen BS· Adverse childhood experiences, allostasis, allostatic load, and  
25 age-related disease· *Physiology & behavior* 2012; **106**(1): 29-39·
- 26 62· Yaribeygi H, Panahi Y, Sahraei H, Johnston TP, Sahebkar A· The impact of stress on  
27 body function: A review· *EXCLI journal* 2017; **16**: 1057·
- 28 63· Hollingsworth K, Callaway L, Duhig M, Matheson S, Scott J· The association between  
29 maltreatment in childhood and pre-pregnancy obesity in women attending an antenatal clinic  
30 in Australia· *PLoS One* 2012; **7**(12): e51868·
- 31 64· Cornelius DC, Cottrell J, Amaral LM, LaMarca B· Inflammatory mediators: a causal  
32 link to hypertension during preeclampsia· *British journal of pharmacology* 2019; **176**(12):  
33 1914-21·
- 34 65· Rodrigo N, Glastras SJ· The emerging role of biomarkers in the diagnosis of gestational  
35 diabetes mellitus· *Journal of clinical medicine* 2018; **7**(6): 120·
- 36 66· Leeners B, Richter-Appelt H, Imthurn B, Rath W· Influence of childhood sexual abuse  
37 on pregnancy, delivery, and the early postpartum period in adult women· *Journal of*  
38 *psychosomatic research* 2006; **61**(2): 139-51·
- 39 67· Wosu AC, Gelaye B, Williams MA· Maternal history of childhood sexual abuse and  
40 preterm birth: an epidemiologic review· *BMC pregnancy and childbirth* 2015; **15**(1): 1-9·
- 41 68· Adcock A, Bate, A, & Woodhouse, J· (2016)· Effect of social media on the mental  
42 health of young people· Retrieved  
43 from <http://researchbriefings.parliament.uk/ResearchBriefing/Summary/CDP-2016-0196>·
- 44 69· Sterling P· Allostasis: a new paradigm to explain arousal pathology· *Handbook of life*  
45 *stress, cognition and health* 1988·
- 46 70· McEwen BS· Protective and damaging effects of stress mediators: central role of the  
47 brain· *Dialogues in clinical neuroscience* 2006; **8**(4): 367·
- 48 71· Olson DM, Severson EM, Verstraeten BSE, Ng JWY, McCreary JK, Metz GAS·  
49 Allostatic load and preterm birth· *International journal of molecular sciences* 2015; **16**(12):  
50 29856-74·
- 51  
52  
53  
54  
55  
56  
57  
58  
59  
60



72· Dodd JM, Turnbull DA, McPhee AJ, Wittert G, Crowther CA, Robinson JS· Limiting weight gain in overweight and obese women during pregnancy to improve health outcomes: the LIMIT randomised controlled trial· *BMC pregnancy and childbirth* 2011; **11**(1): 1-5·

73· Poston L, Bell R, Croker H, et al· Effect of a behavioural intervention in obese pregnant women (the UPBEAT study): a multicentre, randomised controlled trial· *The lancet Diabetes & endocrinology* 2015; **3**(10): 767-77·

74· in Pregnancy TIWM, Group C· Effect of diet and physical activity based interventions in pregnancy on gestational weight gain and pregnancy outcomes: meta-analysis of individual participant data from randomised trials· *The BMJ* 2017; **358**·

75· Mishra K, Atkins DE, Gutierrez B, Wu J, Cousineau MR, Hempel S· Screening for adverse childhood experiences in preventive medicine settings: a scoping review· *Journal of Public Health* 2021: 1-10·

76· Gentry S, Paterson B· Does screening or routine enquiry for adverse childhood experiences (ACEs) meet criteria for a screening programme? A rapid evidence summary· *Journal of Public Health* 2021·

**Figure-1: PRISMA diagram outlining the search strategy and selection of studies included in this review.**

**Figure-2: Association of any ACE exposure with risk of pregnancy complications**

**Figure-3: Association of any ACE exposure and adverse pregnancy outcomes**

### Supplemental information

Supplementary figure -1.1: Association of  $\geq 4$  ACEs and adverse pregnancy complications

Supplementary figure -1.2: Association of  $<4$  ACEs and adverse pregnancy complications

Supplementary figure -1.3: Association of ACEs (continuous scale) and adverse pregnancy complications

Supplementary figure -2.1: Association of  $\geq 4$  ACEs and adverse pregnancy outcomes

Supplementary figure -2.2: Association of  $<4$  ACEs and adverse pregnancy outcomes

Supplementary figure -2.3: Association ACEs (continuous scale) and adverse pregnancy outcomes

Supplementary Table 1: Quality assessment tools

Supplementary Table 2: Quality of the study

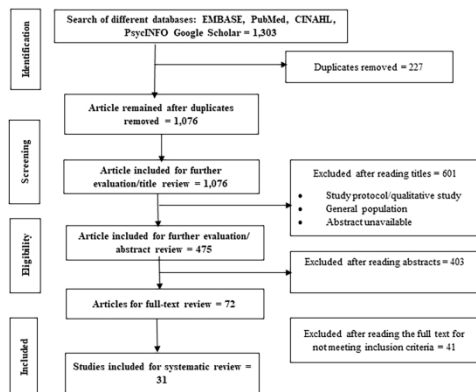

338x190mm (300 x 300 DPI)

1  
2  
3  
4  
5  
6  
7  
8  
9  
10  
11  
12  
13  
14  
15  
16  
17  
18  
19  
20  
21  
22  
23  
24  
25  
26  
27  
28  
29  
30  
31  
32  
33  
34  
35  
36  
37  
38  
39  
40  
41  
42  
43  
44  
45  
46  
47  
48  
49  
50  
51  
52  
53  
54  
55  
56  
57  
58  
59  
60

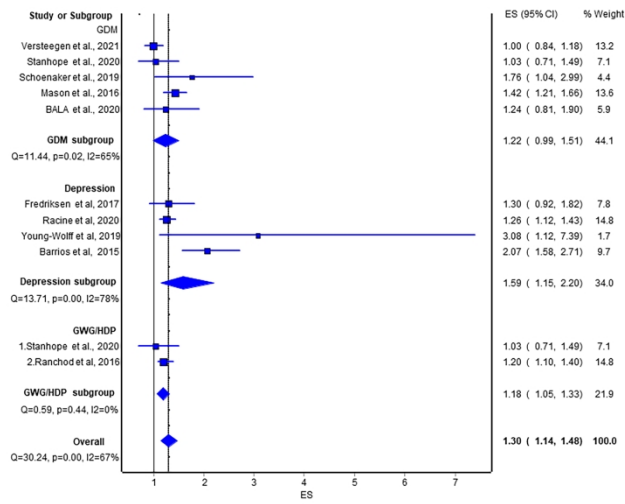

338x190mm (300 x 300 DPI)

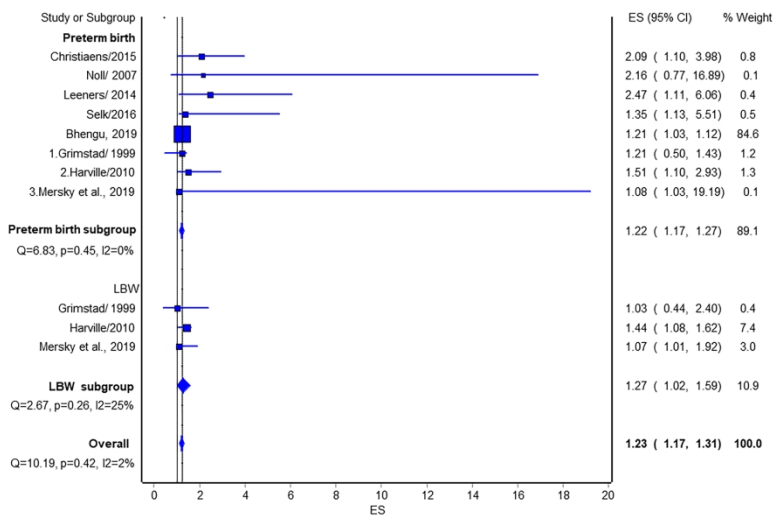

338x190mm (300 x 300 DPI)

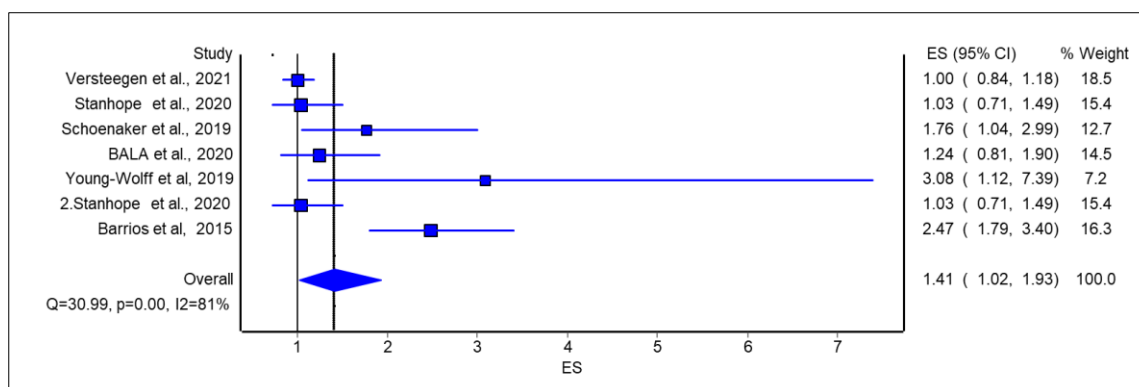

**Supplementary figure -1.1: Association of  $\geq 4$  ACEs and adverse pregnancy complications**

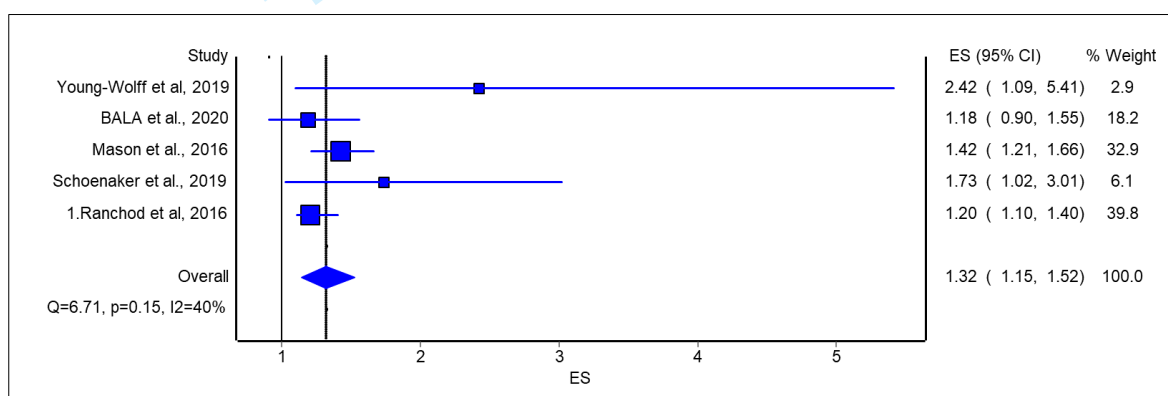

**Supplementary figure -1.2: Association of  $< 4$  ACEs and adverse pregnancy complications**

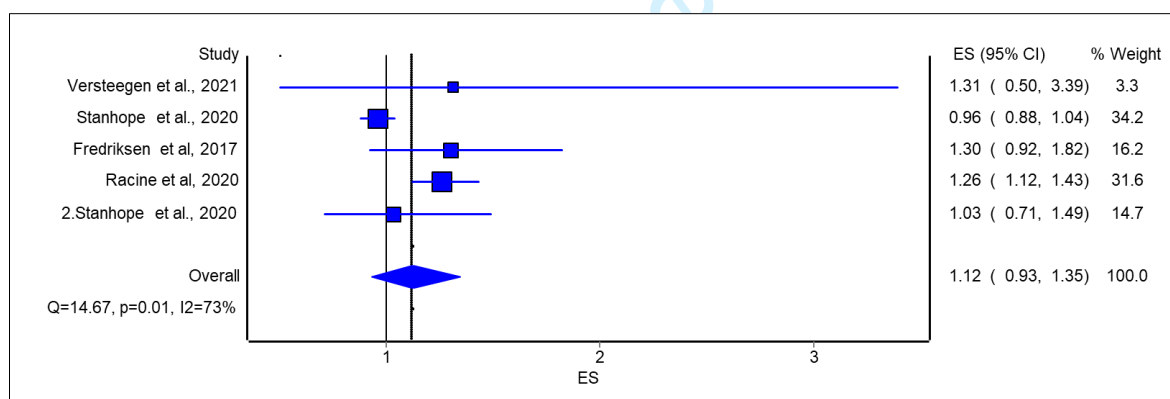

**Supplementary figure -1.3: Association of ACEs (continuous scale) and adverse pregnancy complications**

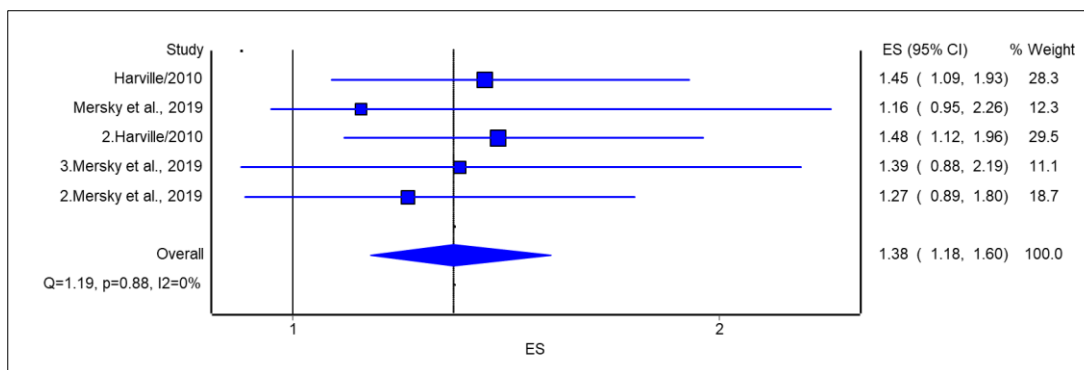

Supplementary figure -2.1: Association of  $\geq 4$  ACEs and adverse pregnancy outcomes

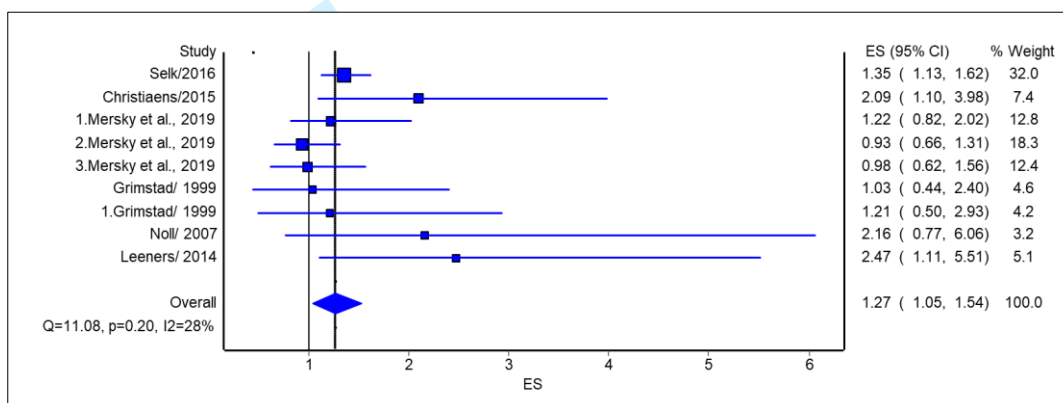

Supplementary figure -2.2: Association of  $< 4$  ACEs and adverse pregnancy outcomes

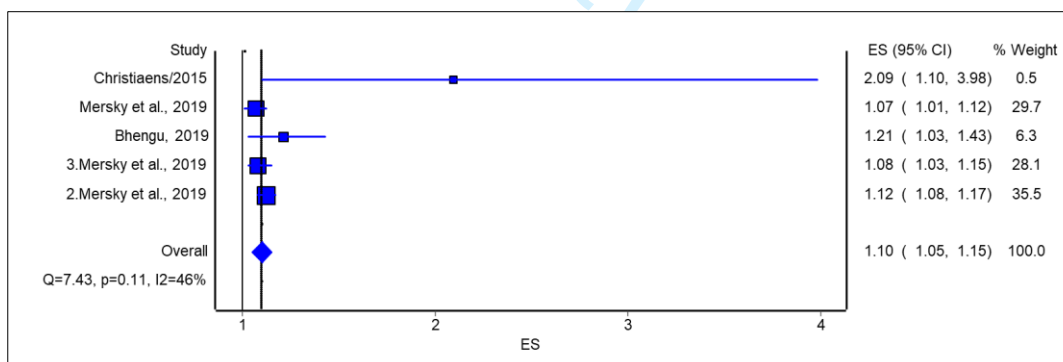

Supplementary figure -2.3: Association ACEs (continuous scale) and adverse pregnancy outcomes

**Supplementary Table 1: Quality assessment tools**

| <b>Study Quality Evaluation</b> |                                                                                                                                                                                                                                         |               |
|---------------------------------|-----------------------------------------------------------------------------------------------------------------------------------------------------------------------------------------------------------------------------------------|---------------|
| <b>Item</b>                     | <b>Question</b>                                                                                                                                                                                                                         | <b>Coding</b> |
| 1. Question                     | Was the research question or objective in this paper clearly stated?                                                                                                                                                                    | 0-No<br>1-Yes |
| 2. Population                   | Was the study population clearly specified and defined?                                                                                                                                                                                 | 0-No<br>1-Yes |
| 3. Participation                | Was the participation rate of eligible persons at least 50%?                                                                                                                                                                            | 0-No<br>1-Yes |
| 4. Inclusion/Exclusion Criteria | Were all the subjects selected or recruited from the same or similar populations (including the same time period)? Were inclusion and exclusion criteria for being in the study prespecified and applied uniformly to all participants? | 0-No<br>1-Yes |
| 5. Sample Size                  | Was a sample size justification, power description, or variance and effect estimates provided?                                                                                                                                          | 0-No<br>1-Yes |
| 6.                              | For the analyses in this paper, were the exposure(s) of interest measured prior to the outcome(s) being measured?                                                                                                                       | 0-No<br>1-Yes |
| 7. Timeframe                    | Was the timeframe sufficient so that one could reasonably expect to see an association between exposure and outcome if it existed?                                                                                                      | 0-No<br>1-Yes |
| 8. Levels of Exposure           | For exposures that can vary in amount or level, did the study examine different levels of the exposure as related to the outcome (e.g., categories of exposure, or exposure measured as continuous variable)?                           | 0-No<br>1-Yes |
| 9. Independent Variable         | Were the exposure measures (independent variables) clearly defined, valid, reliable, and                                                                                                                                                | 0-No<br>1-Yes |

|                                      |                                                                                                                                                                                                                           |                                                       |
|--------------------------------------|---------------------------------------------------------------------------------------------------------------------------------------------------------------------------------------------------------------------------|-------------------------------------------------------|
|                                      | implemented consistently across all study participants?                                                                                                                                                                   |                                                       |
| 10. Longitudinal/Repeated ACEs       | Was the exposure(s) assessed more than once over time?                                                                                                                                                                    | 0-No<br>1-Yes                                         |
| 11. Dependent Variable               | Were the outcome measures (dependent variables) clearly defined, valid, reliable, and implemented consistently across all study participants?                                                                             | 0-No<br>1-Yes                                         |
| 12. Objectivity independent variable | Does the study use objective reports or multiple-methods to measure maternal ACEs?<br><br>Objective measure = child abuse reports<br><br>Multiple methods = self-report and corroborated reports.                         | 0-self report<br>1-objective measure/multiple methods |
| 13. Objective dependent variables    | Does the study use different reporters or multiple-methods to measure maternal health/mental health outcomes?<br><br>Objective measure = hospital report, diagnosis by physician, measurement by health care professional | 0-self report<br>1-objective measure/multiple methods |
| 14. Lost to Follow-Up                | Was loss to follow-up after baseline 20% or less?                                                                                                                                                                         | 0-No<br>1-Yes                                         |
| 15. Confounder                       | Were key potential confounding variables measured and adjusted statistically for their impact on the relationship between exposure(s) and outcome(s)?                                                                     | 0-No<br>1-Yes                                         |
| <b>Total</b>                         | A sum of all items was calculated to obtain a total quality score (0-15).                                                                                                                                                 |                                                       |



Supplementary Table 2: Quality of the study

| SI# | First Author/Pub Date         | Question | Population | Participation | Inclusion/Exclusion Criteria | Sample Size | Exposures | Timeframe | Levels of Exposure | Independent Variable | Longitudinal/Repeated ACEs | Dependent Variable | Objectivity independent variable | Objective dependent variables | Lost to Follow-Up | Confounder | Overall |
|-----|-------------------------------|----------|------------|---------------|------------------------------|-------------|-----------|-----------|--------------------|----------------------|----------------------------|--------------------|----------------------------------|-------------------------------|-------------------|------------|---------|
| 1   | Christiaens/2015              | 1        | 1          | 0             | 1                            | 1           | 1         | 1         | 1                  | 1                    | 0                          | 0                  | 1                                | 0                             | 0                 | 1          | 10      |
| 2   | Grimstad/ 1999                | 1        | 1          | 1             | 1                            | 1           | 1         | 1         | 0                  | 0                    | 0                          | 0                  | 1                                | 1                             | 0                 | 0          | 9       |
| 3   | Stevens- Simon/1994           | 1        | 1          | 1             | 0                            | 0           | 1         | 1         | 0                  | 0                    | 0                          | 0                  | 1                                | 1                             | 0                 | 0          | 7       |
| 4   | Noll/ 2007                    | 1        | 1          | 1             | 0                            | 0           | 1         | 1         | 0                  | 0                    | 0                          | 0                  | 1                                | 1                             | 0                 | 0          | 7       |
| 5   | Leeners/ 2014                 | 0        | 1          | 1             | 0                            | 0           | 1         | 0         | 0                  | 0                    | 0                          | 0                  | 0                                | 0                             | 0                 | 1          | 10      |
| 6   | Selk/2016                     | 1        | 1          | 1             | 1                            | 1           | 1         | 1         | 1                  | 1                    | 0                          | 1                  | 1                                | 1                             | 0                 | 1          | 13      |
| 7   | Harville/2010                 | 1        | 1          | 1             | 0                            | 1           | 1         | 1         | 1                  | 1                    | 1                          | 1                  | 0                                | 1                             | 0                 | 1          | 12      |
| 8   | Rich-Edwards et al., 2010     | 1        | 1          | 1             | 1                            | 1           | 1         | 1         | 1                  | 1                    | 0                          | 1                  | 1                                | 1                             | 0                 | 1          | 13      |
| 9   | Versteegen et al., 2021       | 1        | 1          | 1             | 1                            | 1           | 1         | 1         | 1                  | 1                    | 0                          | 1                  | 1                                | 1                             | 1                 | 1          | 14      |
| 10  | Stanhope et al., 2020         | 1        | 1          | 1             | 1                            | 1           | 1         | 1         | 1                  | 1                    | 0                          | 1                  | 1                                | 1                             | 1                 | 1          | 14      |
| 11  | Schoenaker et al., 2019       | 1        | 1          | 1             | 1                            | 1           | 1         | 1         | 1                  | 1                    | 0                          | 1                  | 1                                | 1                             | 1                 | 1          | 14      |
| 12  | Miller et al., 2017           | 1        | 1          | 1             | 1                            | 1           | 1         | 0         | 0                  | 1                    | 0                          | 1                  | 0                                | 1                             | 0                 | 0          | 9       |
| 13  | Mersky et al., 2019           | 1        | 1          | 1             | 1                            | 1           | 1         | 1         | 1                  | 1                    | 0                          | 1                  | 1                                | 1                             | 0                 | 1          | 13      |
| 14  | Mason et al., 2016            | 1        | 1          | 1             | 1                            | 1           | 1         | 1         | 1                  | 1                    | 0                          | 1                  | 1                                | 1                             | 0                 | 1          | 13      |
| 15  | Cammack et al., 2018          | 1        | 1          | 1             | 1                            | 1           | 1         | 1         | 1                  | 1                    | 0                          | 1                  | 1                                | 1                             | 0                 | 1          | 13      |
| 16  | BALA et al., 2020             | 1        | 1          | 1             | 1                            | 1           | 1         | 1         | 0                  | 1                    | 0                          | 1                  | 1                                | 1                             | 0                 | 1          | 12      |
| 17  | Ben Salah et al, 2019         | 1        | 1          | 1             | 1                            | 1           | 1         | 1         | 1                  | 1                    | 0                          | 1                  | 1                                | 1                             | 0                 | 1          | 13      |
| 18  | Bhengu, 2019                  | 1        | 1          | 1             | 1                            | 1           | 1         | 0         | 1                  | 1                    | 1                          | 1                  | 1                                | 1                             | 0                 | 0          | 12      |
| 19  | Gillespie et al. (2017)       | 1        | 1          | 1             | 0                            | 1           | 1         | 1         | 0                  | 1                    | 1                          | 1                  | 1                                | 0                             | 0                 | 0          | 10      |
| 20  | Leeners et al, 2014           | 1        | 1          | 1             | 1                            | 1           | 1         | 1         | 1                  | 1                    | 1                          | 1                  | 1                                | 1                             | 1                 | 1          | 15      |
| 21  | McDonnell and Val et al, 2014 | 1        | 1          | 1             | 1                            | 1           | 1         | 1         | 1                  | 1                    | 1                          | 1                  | 1                                | 1                             | 0                 | 1          | 14      |
| 22  | Shaikh et al., 2019           | 1        | 1          | 1             | 1                            | 0           | 0         | 1         | 1                  | 1                    | 0                          | 1                  | 0                                | 1                             | 1                 | 1          | 11      |
| 23  | Smith et al., 2016            | 1        | 1          | 1             | 1                            | 0           | 0         | 1         | 1                  | 1                    | 0                          | 1                  | 0                                | 0                             | 1                 | 1          | 10      |
| 24  | Ranchod et al, 2016           | 1        | 1          | 1             | 1                            | 0           | 0         | 1         | 0                  | 1                    | 0                          | 1                  | 0                                | 0                             | 0                 | 1          | 8       |
| 25  | Appleton et al, 2019          | 1        | 1          | 1             | 1                            | 0           | 0         | 1         | 0                  | 1                    | 0                          | 1                  | 0                                | 1                             | 1                 | 0          | 9       |
| 26  | Fredriksen et al, 2017        | 1        | 1          | 1             | 1                            | 0           | 0         | 1         | 1                  | 1                    | 0                          | 1                  | 0                                | 0                             | 0                 | 0          | 8       |
| 27  | Hantsoo et al,2019            | 1        | 1          | 1             | 1                            | 0           | 0         | 1         | 0                  | 1                    | 0                          | 1                  | 0                                | 0                             | 0                 | 1          | 8       |
| 28  | Letourneau et al, 2019        | 1        | 1          | 1             | 1                            | 0           | 0         | 1         | 1                  | 1                    | 0                          | 1                  | 0                                | 0                             | 1                 | 1          | 10      |

|    |                         |   |   |   |   |   |   |   |   |   |   |   |   |   |   |   |    |
|----|-------------------------|---|---|---|---|---|---|---|---|---|---|---|---|---|---|---|----|
| 29 | Mersky et al, 2018      | 1 | 1 | 1 | 1 | 0 | 1 | 1 | 1 | 1 | 1 | 1 | 0 | 0 | 1 | 1 | 12 |
| 30 | Narayan et al, 2018     | 1 | 1 | 1 | 1 | 0 | 0 | 1 | 1 | 1 | 0 | 1 | 0 | 0 | 1 | 0 | 9  |
| 31 | Racine et al, 2020      | 1 | 1 | 1 | 1 | 0 | 0 | 1 | 0 | 1 | 0 | 1 | 0 | 0 | 0 | 1 | 8  |
| 32 | Young-Wolff et al, 2019 | 1 | 1 | 1 | 1 | 0 | 0 | 1 | 1 | 1 | 0 | 1 | 0 | 1 | 1 | 1 | 11 |
| 33 | Barrios et al, 2015     | 1 | 1 | 1 | 1 | 0 | 0 | 1 | 1 | 1 | 0 | 1 | 0 | 1 | 1 | 1 | 11 |

For peer review only

1  
2  
3  
4  
5  
6  
7  
8  
9  
10  
11  
12  
13  
14  
15  
16  
17  
18  
19  
20  
21  
22  
23  
24  
25  
26  
27  
28  
29  
30  
31  
32  
33  
34  
35  
36  
37  
38  
39  
40  
41  
42  
43  
44  
45  
46  
47  
48  
49  
50  
51  
52  
53  
54  
55  
56  
57  
58  
59  
60

For peer review only

## Adverse Childhood Experiences, the Risk of Pregnancy Complications and Adverse Pregnancy Outcomes: A Systematic Review and Meta-analysis

| Section/Topic             | Item # | Recommendation                                                                                                                                                                                                                                                                                                                                                                                                                                                         | Reported on page # |
|---------------------------|--------|------------------------------------------------------------------------------------------------------------------------------------------------------------------------------------------------------------------------------------------------------------------------------------------------------------------------------------------------------------------------------------------------------------------------------------------------------------------------|--------------------|
| Title and abstract        | 1      | (a) Indicate the study's design with a commonly used term in the title or the abstract                                                                                                                                                                                                                                                                                                                                                                                 | 2                  |
|                           |        | (b) Provide in the abstract an informative and balanced summary of what was done and what was found                                                                                                                                                                                                                                                                                                                                                                    | 2                  |
| <b>Introduction</b>       |        |                                                                                                                                                                                                                                                                                                                                                                                                                                                                        |                    |
| Background/rationale      | 2      | Explain the scientific background and rationale for the investigation being reported                                                                                                                                                                                                                                                                                                                                                                                   | 4                  |
| Objectives                | 3      | State specific objectives, including any pre-specified hypotheses                                                                                                                                                                                                                                                                                                                                                                                                      | 5                  |
| <b>Methods</b>            |        |                                                                                                                                                                                                                                                                                                                                                                                                                                                                        |                    |
| Study design              | 4      | Present key elements of study design early in the paper                                                                                                                                                                                                                                                                                                                                                                                                                | 5                  |
| Setting                   | 5      | Describe the setting, locations, and relevant dates, including periods of recruitment, exposure, follow-up, and data collection                                                                                                                                                                                                                                                                                                                                        | 6                  |
| Participants              | 6      | (a) <i>Cohort study</i> —Give the eligibility criteria, and the sources and methods of selection of participants. Describe methods of follow-up<br><i>Case-control study</i> —Give the eligibility criteria, and the sources and methods of case ascertainment and control selection. Give the rationale for the choice of cases and controls<br><i>Cross-sectional study</i> —Give the eligibility criteria, and the sources and methods of selection of participants | 6                  |
|                           |        | (b) <i>Cohort study</i> —For matched studies, give matching criteria and number of exposed and unexposed<br><i>Case-control study</i> —For matched studies, give matching criteria and the number of controls per case                                                                                                                                                                                                                                                 | 6                  |
| Variables                 | 7      | Clearly define all outcomes, exposures, predictors, potential confounders, and effect modifiers. Give diagnostic criteria, if applicable                                                                                                                                                                                                                                                                                                                               | 6                  |
| Data sources/ measurement | 8*     | For each variable of interest, give sources of data and details of methods of assessment (measurement). Describe comparability of assessment methods if there is more than one group                                                                                                                                                                                                                                                                                   | 6                  |
| Bias                      | 9      | Describe any efforts to address potential sources of bias                                                                                                                                                                                                                                                                                                                                                                                                              | 6                  |
| Study size                | 10     | Explain how the study size was arrived at                                                                                                                                                                                                                                                                                                                                                                                                                              | 6                  |
| Quantitative variables    | 11     | Explain how quantitative variables were handled in the analyses. If applicable, describe which groupings were chosen and why                                                                                                                                                                                                                                                                                                                                           | 6                  |
| Statistical methods       | 12     | (a) Describe all statistical methods, including those used to control for confounding                                                                                                                                                                                                                                                                                                                                                                                  | 7                  |
|                           |        | (b) Describe any methods used to examine subgroups and interactions                                                                                                                                                                                                                                                                                                                                                                                                    | 7                  |
|                           |        | (c) Explain how missing data were addressed                                                                                                                                                                                                                                                                                                                                                                                                                            | 7                  |
|                           |        | (d) <i>Cohort study</i> —If applicable, explain how loss to follow-up was addressed<br><i>Case-control study</i> —If applicable, explain how matching of cases and controls was addressed                                                                                                                                                                                                                                                                              | 7                  |

1  
2  
3  
4  
5  
6  
7  
8  
9  
10  
11  
12  
13  
14  
15  
16  
17  
18  
19  
20  
21  
22  
23  
24  
25  
26  
27  
28  
29  
30  
31  
32  
33  
34  
35  
36  
37  
38  
39  
40  
41  
42  
43  
44  
45  
46

|                          |     |                                                                                                                                                                                                              |      |
|--------------------------|-----|--------------------------------------------------------------------------------------------------------------------------------------------------------------------------------------------------------------|------|
|                          |     | <i>Cross-sectional study</i> —If applicable, describe analytical methods taking account of sampling strategy                                                                                                 |      |
|                          |     | (e) Describe any sensitivity analyses                                                                                                                                                                        | 7    |
| <b>Results</b>           |     |                                                                                                                                                                                                              |      |
| Participants             | 13* | (a) Report numbers of individuals at each stage of study—eg numbers potentially eligible, examined for eligibility, confirmed eligible, included in the study, completing follow-up, and analysed            | 8-14 |
|                          |     | (b) Give reasons for non-participation at each stage                                                                                                                                                         | 8-14 |
|                          |     | (c) Consider use of a flow diagram                                                                                                                                                                           | 8-14 |
| Descriptive data         | 14* | (a) Give characteristics of study participants (eg demographic, clinical, social) and information on exposures and potential confounders                                                                     | 8-14 |
|                          |     | (b) Indicate number of participants with missing data for each variable of interest                                                                                                                          | 8-14 |
|                          |     | (c) <i>Cohort study</i> —Summarise follow-up time (eg, average and total amount)                                                                                                                             | 8-14 |
| Outcome data             | 15* | <i>Cohort study</i> —Report numbers of outcome events or summary measures over time                                                                                                                          | 8-14 |
|                          |     | <i>Case-control study</i> —Report numbers in each exposure category, or summary measures of exposure                                                                                                         | 8-14 |
|                          |     | <i>Cross-sectional study</i> —Report numbers of outcome events or summary measures                                                                                                                           | 8-14 |
| Main results             | 16  | (a) Give unadjusted estimates and, if applicable, confounder-adjusted estimates and their precision (eg, 95% confidence interval). Make clear which confounders were adjusted for and why they were included | 8-14 |
|                          |     | (b) Report category boundaries when continuous variables were categorized                                                                                                                                    | 8-14 |
|                          |     | (c) If relevant, consider translating estimates of relative risk into absolute risk for a meaningful time period                                                                                             | 8-14 |
| Other analyses           | 17  | Report other analyses done—eg analyses of subgroups and interactions, and sensitivity analyses                                                                                                               |      |
| <b>Discussion</b>        |     |                                                                                                                                                                                                              |      |
| Key results              | 18  | Summarise key results with reference to study objectives                                                                                                                                                     | 15   |
| Limitations              | 19  | Discuss limitations of the study, taking into account sources of potential bias or imprecision. Discuss both direction and magnitude of any potential bias                                                   | 15   |
| Interpretation           | 20  | Give a cautious overall interpretation of results considering objectives, limitations, multiplicity of analyses, results from similar studies, and other relevant evidence                                   | 16   |
| Generalisability         | 21  | Discuss the generalisability (external validity) of the study results                                                                                                                                        | 16   |
| <b>Other information</b> |     |                                                                                                                                                                                                              |      |
| Funding                  | 22  | Give the source of funding and the role of the funders for the present study and, if applicable, for the original study on which the present article is based                                                | 16   |

# BMJ Open

## Adverse Childhood Experiences, the Risk of Pregnancy Complications and Adverse Pregnancy Outcomes: A Systematic Review and Meta-analysis

|                                 |                                                                                                                                                                                                                                                                                                                                                                                                                                                                                                                                                                                                                                                                                                                                                                        |
|---------------------------------|------------------------------------------------------------------------------------------------------------------------------------------------------------------------------------------------------------------------------------------------------------------------------------------------------------------------------------------------------------------------------------------------------------------------------------------------------------------------------------------------------------------------------------------------------------------------------------------------------------------------------------------------------------------------------------------------------------------------------------------------------------------------|
| Journal:                        | <i>BMJ Open</i>                                                                                                                                                                                                                                                                                                                                                                                                                                                                                                                                                                                                                                                                                                                                                        |
| Manuscript ID                   | bmjopen-2022-063826.R1                                                                                                                                                                                                                                                                                                                                                                                                                                                                                                                                                                                                                                                                                                                                                 |
| Article Type:                   | Original research                                                                                                                                                                                                                                                                                                                                                                                                                                                                                                                                                                                                                                                                                                                                                      |
| Date Submitted by the Author:   | 07-Dec-2022                                                                                                                                                                                                                                                                                                                                                                                                                                                                                                                                                                                                                                                                                                                                                            |
| Complete List of Authors:       | Mamun, Abdullah; The University of Queensland<br>Biswas, Tuhin; University of Queensland,<br>Scott, James; University of Queensland<br>Sly, P.D.; University of Queensland, Queensland Childrens Medical<br>Research Instit<br>McIntyre, David; Mater Research Institute The University of Queensland<br>Thorpe , Karen ; University of Queensland<br>Boyle , Frances; University of Queensland<br>Dekker, N; University of Queensland, Centre for Clinical Research<br>Doi, Suhail; Qatar University, Population Medicine<br>Mitchell, Murray; QUT, Faculty of Health, School of Biomedical Sciences<br>McNeil, Keith; Queensland Health<br>Kothari, Alka ; University of Queensland<br>Hardiman, Leah; Queensland Health<br>Callaway, Leonie Kaye; Queensland Health |
| <b>Primary Subject Heading</b>: | Global health                                                                                                                                                                                                                                                                                                                                                                                                                                                                                                                                                                                                                                                                                                                                                          |
| Secondary Subject Heading:      | Public health, Mental health, Health policy                                                                                                                                                                                                                                                                                                                                                                                                                                                                                                                                                                                                                                                                                                                            |
| Keywords:                       | Epidemiology < TROPICAL MEDICINE, EPIDEMIOLOGY, Adverse events < THERAPEUTICS, Diabetes in pregnancy < DIABETES & ENDOCRINOLOGY, Prenatal diagnosis < OBSTETRICS                                                                                                                                                                                                                                                                                                                                                                                                                                                                                                                                                                                                       |
|                                 |                                                                                                                                                                                                                                                                                                                                                                                                                                                                                                                                                                                                                                                                                                                                                                        |

SCHOLARONE™  
Manuscripts

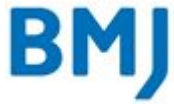

I, the Submitting Author has the right to grant and does grant on behalf of all authors of the Work (as defined in the below author licence), an exclusive licence and/or a non-exclusive licence for contributions from authors who are: i) UK Crown employees; ii) where BMJ has agreed a CC-BY licence shall apply, and/or iii) in accordance with the terms applicable for US Federal Government officers or employees acting as part of their official duties; on a worldwide, perpetual, irrevocable, royalty-free basis to BMJ Publishing Group Ltd ("BMJ") its licensees and where the relevant Journal is co-owned by BMJ to the co-owners of the Journal, to publish the Work in this journal and any other BMJ products and to exploit all rights, as set out in our [licence](#).

The Submitting Author accepts and understands that any supply made under these terms is made by BMJ to the Submitting Author unless you are acting as an employee on behalf of your employer or a postgraduate student of an affiliated institution which is paying any applicable article publishing charge ("APC") for Open Access articles. Where the Submitting Author wishes to make the Work available on an Open Access basis (and intends to pay the relevant APC), the terms of reuse of such Open Access shall be governed by a Creative Commons licence – details of these licences and which [Creative Commons](#) licence will apply to this Work are set out in our licence referred to above.

Other than as permitted in any relevant BMJ Author's Self Archiving Policies, I confirm this Work has not been accepted for publication elsewhere, is not being considered for publication elsewhere and does not duplicate material already published. I confirm all authors consent to publication of this Work and authorise the granting of this licence.

1

2  
3  
4  
5  
6 **Adverse Childhood Experiences, the Risk of Pregnancy Complications and Adverse**  
7  
8 **Pregnancy Outcomes: A Systematic Review and Meta-analysis**  
9

10  
11 **Author's names:** Abdullah Al Mamun, PhD<sup>1,2</sup>, Tuhin Biswas, PhD<sup>1,2</sup>; James G. Scott, PhD<sup>3,4,5</sup>;  
12  
13 Peter D Sly, MD, DSc<sup>6</sup>; David McIntyre, PhD<sup>7</sup>; Karen Thorpe, PhD<sup>1,2</sup>; Frances M.  
14  
15 Boyle, PhD<sup>1</sup>; Marloes Dekker Nitert PhD<sup>8</sup>, Suhail A. R. Doi, PhD<sup>9,10</sup>; Murray Mitchell, PhD<sup>11</sup>;  
16  
17 Keith McNeil, PhD<sup>12</sup>; Alka Kothari, MD FRANZCOG<sup>13,14</sup>, Leah Hardiman MSC<sup>15</sup>, Leonie  
18  
19 Callaway, PhD<sup>15</sup>  
20  
21  
22

9

23  
24  
25  
26 **Author affiliations:**  
27

- 28  
29 1. UQ Poche Centre for Indigenous Health, The University of Queensland, Queensland,  
30  
31 Australia.  
32  
33 2. ARC Centre of Excellence for Children and Families over the Life Course, The  
34  
35 University of Queensland, QLD, Australia  
36  
37  
38 3. Mental Health Research Program, QIMR Berghofer Medical Research Institute,  
39  
40 Herston, QLD, Australia  
41  
42  
43 4. Metro North Mental Health, Royal Brisbane and Women's Hospital, Herston, QLD,  
44  
45 Australia  
46  
47  
48 5. Queensland Centre for Mental Health Research, The Park Centre for Mental Health,  
49  
50 Wacol, QLD, Australia  
51  
52  
53 6. Children's Health and Environment Program, Child Health Research Centre, The  
54  
55 University of Queensland, QLD, Australia  
56  
57  
58  
59  
60



- 1  
2  
3 23 7. Mater Research, Faculty of Medicine, University of Queensland, Mater Health, QLD,  
4  
5 24 Australia.  
6  
7  
8 25 8. School of Chemistry and Molecular Biosciences, The University of Queensland, QLD,  
9  
10 26 Australia  
11  
12 27 9. Research School of Population Health, Australian National University, Canberra,  
13  
14 28 Australian Capital Territory  
15  
16  
17 29 10. Department of Population Medicine, College of Medicine, Qatar University, Doha  
18  
19 30 11. Faculty of Health, School of Biomedical Sciences, The Queensland University of  
20  
21 31 Technology, QLD, Australia  
22  
23  
24 32 12. Prevention Division, Queensland Health, QLD, Australia  
25  
26 33 13. Department of Obstetrics & Gynaecology, Redcliffe Hospital, Anzac Avenue,  
27  
28 34 Redcliffe, QLD, Australia  
29  
30  
31 35 14. Faculty of Medicine, The University of Queensland, QLD, Australia  
32  
33 36 15. Women's and Children's Stream - Metro North Hospital and Health Services, QLD,  
34  
35 37 Australia  
36  
37  
38 38 16. Institute for Social Science Research, The University of Queensland, QLD, Australia  
39  
40 39 17. Asian University for Women (AUW), Chittagong, Bangladesh  
41  
42 40 18.  
43  
44  
45 41

46  
47 42 Corresponding author:  
48

49  
50 43 Abdullah Al Mamun  
51

52  
53 44 UQ Poche Centre for Indigenous Health, The University of Queensland, Queensland,  
54  
55 45 Australia.  
56

57  
58 46 74 High Street, Queensland 4068, Australia.  
59  
60

1  
2  
3 47 Email: [mamun@sph.uq.edu.au](mailto:mamun@sph.uq.edu.au)  
4  
5

6 48 Telephone: +61 7 336 53163  
7  
8

9 49  
10

11 50  
12

13  
14 51 **Abstract**

15  
16  
17 52 **Background:**

18  
19  
20 53 Adverse childhood experiences (ACEs) have a profound negative impact on health. However,  
21  
22 54 the strength of the association between ACEs and pregnancy complications and adverse  
23  
24 55 pregnancy outcomes is not well quantified or understood.  
25  
26

27 56 **Objectives:**

28  
29  
30 57 Conduct a systematic review and meta-analysis of the association between ACEs and risk of  
31  
32 58 pregnancy complications and adverse pregnancy outcomes.  
33  
34

35 59 **Search Strategy:**

36  
37  
38 60 A comprehensive search was conducted using PubMed, EMBASE, CINAHL, PsycINFO,  
39  
40 61 ClinicalTrials.gov and Google scholar up to July 2022.  
41  
42

43 62 **Data Collection and Analysis:**

44  
45  
46 63 Two reviewers independently conducted the screening and quality appraisal using a validated  
47  
48 64 tool. Meta-analysis using the quality-effects model on the reported odds ratio (OR) was  
49  
50 65 conducted. Heterogeneity and inconsistency were examined using the  $I^2$  statistics.  
51  
52

53 66 **Results:**

54  
55  
56 67 Thirty-two studies from 1,508 met a priori inclusion criteria for systematic review, with 21  
57  
58 68 included in the meta-analysis. Pooled analyses showed that exposure to ACEs increased the  
59  
60

1  
2  
3 69 risk of pregnancy complications (odds ratio, OR=1.37, 95% CI: 1.20-1.50) and adverse  
4  
5 70 pregnancy outcomes (OR=1.31, 95% CI: 1.16-1.48). In sub-group analysis, maternal ACEs  
6  
7 71 were associated with gestational diabetes mellitus (OR=1.39, 95% CI: 1.11-1.74), antenatal  
8  
9 72 depression (OR=1.59, 95% CI: 1.15-2.20), low offspring birth weight (OR=1.27, 95% CI:  
10  
11 1.02-1.59), and preterm delivery (OR=1.41, 95% CI: 1.16-1.71).  
12  
13  
14

15 74 **Conclusion:**

16  
17  
18 75 The results suggest that exposure to ACEs increase the risk of pregnancy complications and  
19  
20 76 adverse pregnancy outcomes. Preventive strategies, screening and trauma-informed care need  
21  
22 77 to be examined to improve maternal and child health.  
23  
24

25 78 **Funding statement:** Not applicable  
26  
27

28 79 **Keywords:** Adverse childhood experiences, pregnancy complications, adverse pregnancy  
29  
30 80 outcomes  
31  
32

33 81 **Tweetable abstract:**

34  
35  
36 82 Adverse childhood experiences linked to pregnancy complications and adverse pregnancy  
37  
38 83 outcomes  
39  
40

41 84  
42  
43  
44  
45  
46  
47  
48  
49  
50  
51  
52  
53  
54  
55  
56  
57  
58  
59  
60

## 85 **Strengths and limitations of this study**

- 86 • Maternal ACEs were associated with an increased risk of pregnancy complications,  
87 including GDM, GWG, HDP and depression/anxiety during pregnancy.
- 88 • ACE exposure showed a significant association with any adverse pregnancy outcome.
- 89 • Most of the included studies are from high-income western countries. Due to the lack  
90 of data, we could not conduct the ACEs item-specific analysis.
- 91 • The dose-response relationship in all studies could not be assessed as different studies  
92 use different screening tools and cut-off values.

## 94 **Introduction**

95 Adverse Childhood Experiences (ACEs)[1] are psychosocial stressors and traumas  
96 experienced by an individual before 18 years of age[2, 3] The pioneering study by Felitti and  
97 colleagues (1998) demonstrated that exposure to ACEs is common, ACEs co-occur and that  
98 exposure to multiple ACEs are associated with an increased risk of health risk behaviours and  
99 illnesses.[4] Subsequently, a growing body of research has continued to provide consistent  
100 evidence that ACEs are a major public health issue due to their high prevalence and harmful  
101 effects that ACEs have on human health throughout life. [5, 6]

102  
103 Early life experiences are recognized as essential determinants for health outcomes later in life  
104 especially in pregnant women and their children. [7] Adverse health outcomes in pregnancy  
105 can then result in intergenerational transmission of adverse health outcomes. Perhaps this  
106 occurs because women who have experienced ACEs may be a vulnerable group for  
107 development of health risk behaviours, including smoking, drug and alcohol use and sedentary  
108 lifestyle, along with consequences of trauma such as poor sleep.[5] These behaviours increase  
109 the risk of pregnancy complications including gestational diabetes mellitus (GDM),  
110 hypertensive disorder of pregnancy (HDP), excess gestational weight gain (GWG),

1  
2  
3 111 depression/anxiety during pregnancy [8] and adverse pregnancy outcomes including low birth  
4  
5 112 weight and preterm birth.[9-11] Systematic reviews have reported women who had  
6  
7 113 experienced child maltreatment are more likely to have pregnancy complications and that  
8  
9 114 physical abuse and household substance abuse were associated with greater risk of GDM[12,  
10  
11 115 13] resulting in intergenerational transmission of adverse health outcomes. Overall, those  
12  
13 116 reporting exposure to multiple ACEs (mostly 4 or more) have an increased risk of physical,  
14  
15 117 mental, and substance use disorders. [14]  
16  
17  
18  
19

20 118  
21  
22 119 There is little information about ACEs and the associated risk of pregnancy complications and  
23  
24 120 adverse birth outcomes. A longitudinal study in Australia reported that women exposed to  
25  
26 121 three or more ACEs had an elevated GDM risk.[15] In contrast, a longitudinal study from the  
27  
28 122 USA reported no significant association between ACEs (for each score change and reported 4  
29  
30 123 or more ACEs) and GDM.[16] A systematic review suggests that total ACEs (score in  
31  
32 124 continuous scale) are associated with preterm birth, although this finding needs to be confirmed  
33  
34 125 in other studies to explore the associations between ACEs and preterm birth using appropriate  
35  
36 126 and valid instruments.[17] Another systematic review and meta-analysis reported that maternal  
37  
38 127 history of abuse before pregnancy was significantly associated with preterm delivery and low  
39  
40 128 birth weight.[18] No systematic review and meta-analysis has investigated the association of  
41  
42 129 ACEs and the risk of pregnancy complications including GDM, HDP, GWG,  
43  
44 130 depression/anxiety during pregnancy and adverse pregnancy outcomes. This study aims to  
45  
46 131 systematically review and meta-analyse existing studies to establish the extent of association  
47  
48 132 between ACEs and pregnancy complications and adverse birth outcomes. Understanding these  
49  
50 133 associations will inform maternal clinical care and support for offspring of those women  
51  
52 134 exposed to ACEs.  
53  
54  
55  
56  
57  
58  
59  
60

## 136 **Methods**

137 In this systematic review and meta-analysis, we followed the Preferred Reporting Items for  
138 Systematic Reviews and Meta-Analyses Protocols (PRISMA-P) guidelines [19] and the Meta-  
139 Analysis of Observational Studies in Epidemiology protocol [20] to ensure all necessary steps  
140 were followed. In accordance with the guidelines, the systematic review and meta-analysis  
141 protocol was registered in PROSPERO (CRD42021278030).

## 143 **Literature search strategy**

144 Our search included studies published to July 2022 using PubMed, EMBASE, CINAHL,  
145 PsycINFO, ClinicalTrials.gov and Google scholar. The search strategy employed with PubMed  
146 is: (((((((((((("adverse childhood experiences") OR ("childhood adversities")) OR  
147 ("childhood abuse")) OR ("childhood maltreatment")) OR ("child trauma")) OR ("adverse  
148 childhood events")) OR ("childhood sexual abuse")) OR ("childhood physical abuse")) OR  
149 ("childhood mental abuse")) OR ("childhood trauma")) OR ("childhood violence")) OR  
150 ("childhood hardship")) OR ("childhood suffering")) OR ("childhood Stress")) AND  
151 (((((((((((("pregnancy complications") OR ("Depression")) OR ("Anxiety")) OR ("Prenatal  
152 depression")) OR ("Depressive symptoms")) OR ("Antenatal depression")) OR ("Mental health  
153 problem")) OR ("gestational diabetes mellitus")) OR ("GDM")) OR ("hypertensive disorder of  
154 pregnancy")) OR ("HDP")) OR ("preeclampsia")) OR ("maternal body weight")) OR ("excess  
155 weight gain")) OR ("abnormal fetal growth")) OR ("Intrauterine growth restriction")) OR  
156 ("Low birth weight")) OR (LBW)) OR (IUGR)) OR (Stillbirth)) OR ("small of gestational  
157 age")) OR ("preterm birth"). This search details are presented in a supplementary table (Table  
158 S1).

159

### 160 **Inclusion criteria**

161 Studies were included if the full-text was published in English, population was pregnant  
162 women, reported any ACEs including childhood maltreatment ( childhood physical, emotional  
163 and sexual abuse, childhood physical and emotional neglect and exposure to parental intimate  
164 partner violence), childhood trauma or childhood hardship/suffering and if studies reported any  
165 pregnancy-related complications according to National Institute of Health (NIH)[21] (GDM,  
166 HDP, GWG, depression/anxiety during pregnancy) and adverse birth outcomes such as low  
167 birth weight, intra-uterine growth restriction (IUGR), preterm birth, stillbirth. Studies were  
168 excluded if: (1) published in languages other than English; (2) included general population (not  
169 pregnant); (3) reported reviews, qualitative studies, editorials, abstracts, case reports and letters  
170 to the editor or (4) explored violence during pregnancy.

171

### 172 **Data extraction**

173 Two independent reviewers (TB and AAM) carried out the data extraction. If AAM and TB  
174 did not reach agreement, the small group (AAM, TB, LC and JS) discussed discrepancies to  
175 reach a consensus. A similar approach was used for title/abstract and full text reviews. Relevant  
176 data from each of the selected studies was extracted including first author; study title; country  
177 of study; sample size; study design; types of ACEs; measurement scale; and outcomes (both  
178 risk of pregnancy complications and adverse pregnancy outcomes) and recorded on an Excel  
179 spreadsheet.

180

### 181 **Quality assessment**

182 Fifteen-point scale quality assessment tools were used to assess the quality and risk of bias of  
183 the studies. We adapted a quality assessment tool from NIH “Quality Assessment Tool for

1  
2  
3 184 Observational Cohort and Cross-sectional studies”.[22] This tool allowed assessment of the  
4  
5 185 question, population, participation, inclusion/exclusion criteria, sample size, exposures,  
6  
7 186 timeframe, levels of exposure, independent variables, longitudinal/repeated ACEs, dependent  
8  
9 187 variable, objectively measured independent variables, objectively measured dependent  
10  
11 188 variables, lost to follow-up and confounders (**Supplementary** Table S2). Overall quality score  
12  
13 189 was considered as a continuous variable for bias adjustment in the pooled estimates. However,  
14  
15 189 was considered as a continuous variable for bias adjustment in the pooled estimates. However,  
16  
17 190 we have also categorised the overall quality score into three groups: 13-15 as high; 10-12 as  
18  
19 191 moderate and <10 as low.

20  
21  
22 192 The results of the quality assessment are presented in **Supplementary** Table S3.  
23  
24  
25 193



## 195 **Data Analysis**

196 Meta-analysis conducted in accordance with the meta-analysis of observational studies in  
197 epidemiology (MOOSE) guidelines. Analyses focused on the overall association between  
198 ACEs and risk of pregnancy complications and adverse birth outcomes. Subgroup data  
199 synthesis was performed only when three or more studies were available with the estimates for  
200 a similar type of ACE exposures. ACE scores were considered on the continuous scale (for  
201 each unit change) and three categories: i) none versus one ACEs; ii) two to three ACEs (low  
202 ACEs); and (iii) four or more ACEs (high ACEs). Although most of the studies reported the  
203 odds ratio (OR) as the measurement of association between exposures and outcomes, two  
204 studies reported relative risk (RR) and one hazard ratio (HR). We converted all measures of  
205 associations into ORs using conversion methods reported elsewhere. [23] In the meta-analysis,  
206 we used the quality effects model (QE) [24] for bias adjustment. The advantage of the QE  
207 model is that the between-study variability is adjusted based on the relative quality rank of the  
208 studies instead of on random variables assigned by the random effect (RE) model. The  
209 heterogeneity of the studies was reported by the I-squared value (I<sup>2</sup>) that measures the  
210 proportion of total variance between studies beyond random error.[24] We checked for  
211 publication bias through visualization by funnel plot and Doi plot.[25] All the analyses were  
212 conducted using the MetaXL software version 5.3.[26]

213

## 214 **Patient and Public Involvement**

215 None

## 216 **Data sharing**

217 This is a systematic review of literature. All the data extracted from the literature is available  
218 on reasonable request.

1  
2  
3 219 **Results**  
4  
5

6 220 The literature search resulted in 1,508 records, which were screened for duplication (n=398),  
7  
8 221 review of titles (n=1,086) and further abstract evaluation (n=485). Finally, 32 studies met our  
9  
10 222 inclusion criteria for systematic review, and 21 were included in meta-analysis (**Figure 1**).  
11  
12 223 75% of the studies were cohort studies and the remainder were either cross sectional or case-  
13  
14 224 control studies. The majority of the studies were conducted in the USA (n = 19), with fewer  
15  
16 225 studies from Canada (n=3), Europe (n=6) and other regions (n=5). The study sample sizes  
17  
18 226 varied from 48 to 11,556. The publication year ranged from 1994 to 2022. Thirteen studies  
19  
20 227 used the 10-item ACEs questionnaire[8, 16, 27-37], three used World Health Organization  
21  
22 228 (WHO) ACE-IQ questionnaires[38-40] with one study used 8-items [41] and two studies used  
23  
24 229 19-items questionnaire[42, 43] and fourteen studies used other measures [35, 44-55] (**Table-**  
25  
26  
27  
28  
29 230 **1**).  
30  
31

32 231  
33  
34  
35  
36  
37  
38  
39  
40  
41  
42  
43  
44  
45  
46  
47  
48  
49  
50  
51  
52  
53  
54  
55  
56  
57  
58  
59  
60

232 **Table-1: Characteristics of studies included in the systematic review and meta-analysis**

| SI# | First Author/Pub Date   | Country     | Study design      | Sample size | Measurement scale                                                                                                                                                                                                                                                                                                                                                                                               |
|-----|-------------------------|-------------|-------------------|-------------|-----------------------------------------------------------------------------------------------------------------------------------------------------------------------------------------------------------------------------------------------------------------------------------------------------------------------------------------------------------------------------------------------------------------|
| 1   | Christiaens/2015        | Canada      | Case-control      | 622         | 10-item self-report tool by Felliti et al                                                                                                                                                                                                                                                                                                                                                                       |
| 2   | Grimstad/ 1999          | Norway      | Case-control      | 174         | Were asked about the character of the experience(s): Genital Touch; Forced to touch the other person’s genitals; Attempted Coitus; 4. Penile Vaginal Coitus                                                                                                                                                                                                                                                     |
| 3   | Noll/ 2007              | USA         | Cohort            | 186         | Childhood sexual abuse                                                                                                                                                                                                                                                                                                                                                                                          |
| 4   | Leeners/ 2014           | Switzerland | Cohort            | 255         | Childhood sexual abuse experiences were additionally explored using questions modified by Wyatt                                                                                                                                                                                                                                                                                                                 |
| 5   | Selk/2016               | USA         | Case-control      | 51434       | The measure of physical abuse included items from the Revised Conflict Tactics Scale (CTS); The sexual abuse measure was derived from the survey by Finkelhor et al                                                                                                                                                                                                                                             |
| 6   | Harville/2010           | UK          | Cohort            | 4865        | The phrase “childhood hardship” is used herein to refer to a number of adverse situations in childhood: <ul style="list-style-type: none"> <li>• Financial/structural hardship</li> <li>• No interest in education</li> <li>• Family dysfunction</li> <li>• Lack of supportive caregiving</li> <li>• Violence/mental health issues</li> <li>• Issues of family structure</li> <li>• No. of hardships</li> </ul> |
| 7   | Appleton et al, 2019    | USA         | Cohort study      | 126         | 10-item self-report tool by Felliti et al                                                                                                                                                                                                                                                                                                                                                                       |
| 8   | Versteegen et al., 2021 | USA         | Cohort            | 30          | 10-item self-report tool by Felliti et al                                                                                                                                                                                                                                                                                                                                                                       |
| 9   | Stanhope et al., 2020   | USA         | Cohort            | 2319        | 10-item self-report tool by Felliti et al                                                                                                                                                                                                                                                                                                                                                                       |
| 10  | Schoenaker et al., 2019 | Australia   | Cohort            | 11,556      | 10-item self-report tool by Felliti et al                                                                                                                                                                                                                                                                                                                                                                       |
| 11  | Miller et al., 2017     | USA         | Prospective study | 744         | asked women a series of questions about their family’s conditions during childhood                                                                                                                                                                                                                                                                                                                              |
| 12  | Mersky et al., 2019     | USA         | Longitudinal      | 1848        | 19-item assessment that has demonstrated good internal consistency                                                                                                                                                                                                                                                                                                                                              |
| 13  | Mason et al., 2016      | USA         | Cohort            | 45,550      | Physical abuse and Sexual abuse                                                                                                                                                                                                                                                                                                                                                                                 |

|    |                         |              |                                  |       |                                                                                                                                                                               |
|----|-------------------------|--------------|----------------------------------|-------|-------------------------------------------------------------------------------------------------------------------------------------------------------------------------------|
| 14 | Cammack et al., 2018    | USA          | Cohort                           | 230   | Childhood Trauma Questionnaire Short-Form (CTQ)                                                                                                                               |
| 15 | BALA et al., 2020       | Rhode Island | Population-based survey          | 3350  | 7-item questionnaire                                                                                                                                                          |
| 16 | Ben Salah et al, 2019   | Tunesia      | Prospective follow-up study      | 593   | ACE-International Questionnaire (ACE-IQ)                                                                                                                                      |
| 17 | Bhengu, 2019            | South Africa | cross-sectional                  | 223   | WHO-ACE IQ                                                                                                                                                                    |
| 18 | Gillespie et al. (2017) | USA          | Prospective observational design | 89    | The Stress and Adversity Inventory (STRAIN)                                                                                                                                   |
| 19 | Leeners et al, 2014     | Switzerland  | cohort                           | 225   | using questions modified from a questionnaire developed by Wyatt                                                                                                              |
| 20 | McDonnell et al, 2014   | USA          | Cohort                           | 398   | 10-item self-report tool by Felitti et al                                                                                                                                     |
| 21 | Shaikh et al., 2019     | Pakistan     | Cohort                           | 300   | World Health Organization 31-item ACEs –                                                                                                                                      |
| 22 | Smith et al., 2016      | USA          | Cohort                           | 2303  | The main modification of the instrument was to collapse the sexual events before the age of 18 questions into 1 question asking about childhood sexual abuse prior to age 18. |
| 23 | Ranchod et al, 2016     | USA          | Longitudinal study               | 2,873 | 4-Item questionnaire                                                                                                                                                          |
| 24 | Fredriksen et al, 2017  | Norway       | Cohort                           | 762   | 10-item self-report tool by Felitti et al                                                                                                                                     |
| 25 | Hantsoo et al, 2019     | USA          | Observational study              | 48    | 10-item self-report tool by Felitti et al                                                                                                                                     |
| 26 | Howell, 2019            | USA          | Observational study              | 101   | 10-item self-report tool by Felitti et al                                                                                                                                     |
| 27 | Letourneau et al, 2019  | Canada       | Cohort                           | 907   | 10-item self-report tool by Felitti et al                                                                                                                                     |
| 28 | Narayan et al, 2018     | USA          | Cohort                           | 101   | 10-item self-report tool by Felitti et al                                                                                                                                     |
| 29 | Racine et al, 2020      | Canada       | Cohort                           | 1994  | 10-item self-report tool by Felitti et al                                                                                                                                     |
| 30 | Young-Wolff et al, 2019 | USA          | Cohort                           | 355   | 10-item self-report tool by Felitti et al                                                                                                                                     |
| 31 | Barrios et al, 2015     | USA          | Cohort                           | 1,521 | Eight questions from CDC                                                                                                                                                      |
| 32 | Hardcastle et al., 2022 | UK           | Cross sectional                  | 865   | 10-item self-report tool by Felitti et al                                                                                                                                     |

1  
2  
3 234 In total, 32 studies were included for quality assessment. Eleven studies (34.38%) were  
4  
5 235 assessed as high quality, 12 studies (37.50%) were assessed as moderate quality, and 9 studies  
6  
7 236 (28.13%) were assessed as poor quality (Table S3). ACEs and risk of pregnancy complications  
8  
9  
10 237 ACEs and GDM: Six studies[8, 16, 35, 36, 51, 56] described an association between ACEs and  
11  
12 238 GDM and only one study reported (**Table-2.1**). there was no association between ACEs and  
13  
14 239 GDM [42]. A large epidemiological study in Australia [56] reported that, in pregnant women,  
15  
16 240 exposure to any three ACEs (adjusted relative risk, aRR=1.73, 95% CI:1.0, 3.0) or four or  
17  
18 241 more ACEs (aRR=1.70, 95% CI:1.00, 2.90) was associated with elevated GDM risk after  
19  
20 242 adjusting preconception BMI, unhealthy diet, parity, and maternal age. Another study in the  
21  
22 243 USA by Mason et al., 2016[35] reported that both moderate (adjusted odds ratio, aOR=1.08,  
23  
24 244 95% CI:0.96, 1.22) and severe (aOR=1.42, 95% CI:1.21, 1.66) childhood physical abuse was  
25  
26 245 associated with an increased risk of GDM. This study also reported that forced sexual activity  
27  
28 246 during childhood was associated with an increased risk of GDM (aOR 1.30, 95% CI:1.14,  
29  
30 247 1.49).  
31  
32  
33  
34  
35  
36 248 ACEs, GWG and HDP: Only one study by Ranchod et al., 2016[54] examined the association  
37  
38 249 between ACEs and GWG. They found that exposure to physical abuse and household alcohol  
39  
40 250 abuse were independently associated with a 20% increase in the risk of excessive GWG. A  
41  
42 251 study by Stanhope et al., 2020[8] found that for each ACEs score, there was a slight increase  
43  
44 252 in the HDP risk (aOR=1.03, 95% CI:0.71, 1.49), although it was not statistically significant.  
45  
46 253 However, they found that physical abuse (aOR= 1.22, 95% CI: 1.10-1.42) and household  
47  
48 254 alcohol abuse (aOR= 1.21, 95% CI: 1.11-1.32) were associated with a significant increase in  
49  
50 255 the risk of excessive GWG (**Table-2.1**).  
51  
52  
53  
54  
55  
56 256  
57  
58  
59  
60

257 **Table-2.1: Summary of published measures of effect.**

|    |                                |            |                          |                                                                                                     |
|----|--------------------------------|------------|--------------------------|-----------------------------------------------------------------------------------------------------|
| 1  | Appleton et al, 2019           | Depression | ACE's score (continuous) | Pearson's correlations coefficients (0.37)                                                          |
| 2  | Versteegen et al., 2021        | GDM        | ACEs total               | 1.05 (0.98, 1.14)                                                                                   |
| 3  |                                |            | ACEs binary              | 2.85 (1.15-7.06)                                                                                    |
| 4  | Stanhope et al., 2020          | GDM        | ACEs 4+                  | 1.03 (0.71, 1.49)                                                                                   |
| 5  |                                |            | Continuous ACE score     | 0.96 (0.88, 1.04)                                                                                   |
| 6  |                                | HDP        | ACEs 4+                  | 1.03 (0.71, 1.49)                                                                                   |
| 7  |                                |            | Continuous ACE score:    | 1.03 (0.71, 1.49)                                                                                   |
| 8  | Schoenaker et al., 2019        | GDM        | Three ACEs               | 1.73, (1.02, 3.01)                                                                                  |
| 9  |                                |            | Four or more ACEs        | 1.76, (1.04, 2.99)                                                                                  |
| 10 | Mason et al., 2016             | GDM        | Mild physical abuse      | 1.08 (0.96, 1.22)                                                                                   |
| 11 |                                |            | Moderate physical abuse  | 11.16 (1.04, 1.29)                                                                                  |
| 12 |                                |            | Severe physical abuse    | 1.42 (1.21, 1.66).                                                                                  |
| 13 |                                |            | Forced sexual activity   | 1.30 (1.14, 1.49)                                                                                   |
| 14 |                                |            | Combine                  | 1.42, (1.21, 1.66)                                                                                  |
| 15 | BALA et al., 2020              | GDM        | 3 or more ACEs           | 1.24, (0.81–1.90)                                                                                   |
| 16 |                                |            | 1–2 ACEs                 | 1.18, (0.90– 1.55)                                                                                  |
| 17 | McDonnell et al, 2014          | GDM        |                          | GDM not correlated with ACE indicators                                                              |
| 18 | Ranchod et al, 2016            | GWG        | Physical abuse           | 1.2, (1.1-1.4)                                                                                      |
| 19 |                                |            | Household alcohol abuse  | 1.2, (1.1-1.3)                                                                                      |
| 20 |                                |            | Household mental illness | 1.1, (0.9-1.2).                                                                                     |
| 21 | Fredriksen et al., 2017        | Depression | ACEs continuous          | 1.3, (0.92-1.82)                                                                                    |
| 22 | Hantsoo et al.,2019            | Depression | < 2 ACES                 | EPDS (Median [IQR]): 5 [3, 6]                                                                       |
| 23 |                                |            | 2 or more ACES           | EPDS (Median [IQR]): 3 [1.5, 6.0]                                                                   |
| 24 | Howell et al., 2020            | Depression | ACEs continuous          | Adverse childhood experiences had a direct effect on depression, B=1.11, standard error=.44, p=.01, |
| 25 | Letourneau et al, 2019         | Depression | ACEs continuous          | Maternal ACEs were associated with symptoms of anxiety and depression during pregnancy              |
| 26 | Narayan et al et al., 2018     | Depression | ACEs continuous          | Maternal ACEs were associated with depression during pregnancy ( $\beta = 0.32, p < 0.01$ ).        |
| 27 | Racine et al et al., 2020      | Depression | ACEs continuous          | 1.26, (1.12-1.43)                                                                                   |
| 28 | Young-Wolff et al et al., 2019 | Depression | 3+ ACEs                  | 3.08, (1.12-7.39)                                                                                   |
| 29 |                                |            | 1–2 ACEs                 | 2.42 (1.09–5.41)                                                                                    |
| 30 | Barrios et al., 2015           | Depression |                          | Depression: OR: 2.07; 95% CI: 1.58-2.71                                                             |

1  
2  
3 259 *ACEs and depression/anxiety*: Nine studies[27-33, 37, 41] examined the association between  
4  
5 260 ACEs and depression/anxiety with almost all studies reporting a significant positive association  
6  
7 261 during pregnancy (**Table-2.1**). For example, a large cohort study in Canada by Racine et al,  
8  
9 262 2020[32] reported that ACEs were associated with depressive symptoms in pregnancy (aOR  
10  
11 263 =1.26, 95% CI :1.12–1.43). Another study by Letourneau et al, 2019[30] reported that for each  
12  
13 264 maternal ACE, there was an increased risk of symptoms of anxiety and depression during  
14  
15 265 pregnancy. An observational study in the USA by Hantsoo et al[28, 29] reported that ACEs  
16  
17 266 directly affected depression (B=1.1, standard error=.44, p=.01).

267

25 268 *Meta-analytic results for maternal ACEs and risk of pregnancy complications:*

26  
27  
28 269 A total of 11 studies (72,889 participants) were available for the quality-effect meta-analysis,  
29  
30 270 which produced an association between maternal any ACEs and risk of any adverse pregnancy  
31  
32 271 complications (OR=1.37, 95% CI: 1.20-1.57) (**Figure-2**). In risk factor-specific sub-analysis,  
33  
34 272 five studies (7116 participants) were available for meta-analysis, which produced a moderate  
35  
36 273 association between maternal ACEs and risk of GDM (OR=1.39, 95% CI: 1.11-1.74). For  
37  
38 274 depression/anxiety during pregnancy, four studies (6116 participants) were available for this  
39  
40 275 meta-analysis, which produced an association between maternal ACEs and risk of  
41  
42 276 depression/anxiety during pregnancy (OR=1.5, 95% CI: 1.15-2.2). Both low (OR=1.30, 95%  
43  
44 277 CI: 1.10-1.50) and high (OR=1.41, 95% CI: 1.02-1.90) number of ACEs were associated with  
45  
46 278 and pregnancy complications (**Supplementary Figure S1.1 and 1.2**).

279

54 280 **ACEs and adverse pregnancy outcomes**

55  
56  
57 281 *ACEs and preterm birth*: Out of 31 studies, 12 [34, 38, 40, 42-48, 50, 55, 57] reported the  
58  
59 282 association between ACEs and preterm birth(**Table-2.2**). A study in Tunisia by Ben Salah et  
60

1  
2  
3 283 al. (2019) reported that after adjustment for high-risk pregnancies, environmental tobacco  
4  
5 284 smoke, and intra-familial ACEs, the risk of premature birth was significantly associated with  
6  
7  
8 285 exposure to collective violence (P-value < 0.001) and witnessing community violence (P-value  
9  
10 286 < 0.05). In another study, Harville et al[48] reported that violence exposure during childhood  
11  
12 287 was associated with a 44% increased risk of preterm birth (adjusted RR= 1.40; 95% CI: 1.00-  
13  
14 288 1.90). They also found the family mental health issues increased by 24%, and a 25% increase  
15  
16  
17 289 in the risk of preterm birth. A case-control study in the USA by Selk et al[47] reported that  
18  
19 290 women exposed to forced sex during childhood had a 22% greater risk of preterm birth  
20  
21 291 (adjusted RR=1.2, 95% CI: 1.10-1.30) than those in the no exposure group. Furthermore,  
22  
23 292 exposure to physical and sexual abuse during childhood was associated with a 35% greater risk  
24  
25 293 of preterm birth (adjusted RR=1.30, 95% CI: 1.10-1.60). A study by Miller et al., reported that  
26  
27 294 mothers' childhood economic hardship was independently associated with multiple adverse  
28  
29 300 birth outcomes.[49] A study by Gillespie et al reported that maternal childhood abuse was  
30  
31 295 associated with birth timing (birth timing was operationalized as a days gestation at birth  
32  
33 296 continuous variable and calculated according to obstetric estimate of date of delivery and actual  
34  
35 297 date of delivery extracted from the prenatal and labor and delivery records). [52]  
36  
37  
38  
39

40 299 ACEs and low birth weight:

41  
42  
43 300 Out of 31 studies, six [38, 42, 44, 48, 50, 53] reported an association between ACEs and low  
44  
45 301 birth weight (**Table-2.2**).  
46  
47  
48  
49  
50  
51  
52  
53  
54  
55  
56  
57  
58  
59  
60



303 **Table-2.2: Summary of published measures of effect.**

| SI#                           | First Author/Pub Date    | Outcomes         | Types of ACEs and analytical unit   | Findings (OR, 95% CI)                                                           |
|-------------------------------|--------------------------|------------------|-------------------------------------|---------------------------------------------------------------------------------|
| 1                             | Christiaens et al., 2015 | Preterm birth    | High ACE score ( $\geq 2$ ACE)      | 2.09, (1.10–3.98)                                                               |
|                               |                          |                  | ACE's score (continuous)            | 1.18, (0.99–1.40)                                                               |
| 2                             | Grimstad et al., 1999    | Preterm birth    | Sexual Abuse                        | 1.03, (0.44–2.4)                                                                |
|                               |                          | Low birth weight | Sexual Abuse                        | 1.21, (0.5–2.93)                                                                |
| 3                             | Noll et al., 2007        | Preterm birth    | Sexual abuse                        | 2.16, (0.77–6.06)                                                               |
| 4                             | Leeners et al., 2014     | Preterm birth    | Sexual abuse                        | 2.47, (1.11–5.51)                                                               |
| 5                             | Selk et al., 2016        | Preterm birth    | Severe physical only                | 1.02, (0.88–1.17)                                                               |
|                               |                          |                  | Forced sex only                     | 1.22, (1.1–1.35)                                                                |
|                               |                          |                  | Experienced both severe abuse types | 1.35, (1.13–1.62)                                                               |
| 6                             | Harville et al., 2010    | Preterm birth    | Financial/structural hardship       | 1.20 (0.90–1.60)                                                                |
|                               |                          |                  | No interest in education            | 1.17 (0.93–1.48)                                                                |
|                               |                          |                  | Family dysfunction                  | 1.20 (0.94–1.52)                                                                |
|                               |                          |                  | Lack of supportive caregiving       | 0.98 (0.81–1.19)                                                                |
|                               |                          |                  | Violence/mental health issues       | 1.24 (0.94–1.63)                                                                |
|                               |                          |                  | Issues of family structure          | 1.25 (1.02–1.54)                                                                |
|                               |                          | Low birth weight | No. of hardships ( $\geq 4$ )       | 1.45 (1.09–1.93)                                                                |
|                               |                          |                  | Financial/structural hardship       | 1.18 (0.88–1.60)                                                                |
|                               |                          |                  | No interest in education:           | 1.18 (0.88–1.60)                                                                |
|                               |                          |                  | Family dysfunction                  | 1.18 (0.88–1.60)                                                                |
|                               |                          |                  | Lack of supportive caregiving       | 1.18 (0.88–1.60)                                                                |
|                               |                          |                  | Violence/mental health issues       | 1.48 (1.12–1.96)                                                                |
|                               |                          |                  | Issues of family structure          | 1.48 (1.12–1.96)                                                                |
| No. of hardships ( $\geq 4$ ) | 1.48 (1.12–1.96)         |                  |                                     |                                                                                 |
| 11                            | Miller et al., 2017      | Birth outcomes   | Childhood economic hardship         | Mother's hardship independently associated with multiple adverse birth outcomes |
| 12                            | Mersky et al., 2019      | Preterm birth    | ACE scores (continuous)             | 1.07, (1.01–1.12)                                                               |
|                               |                          |                  | 1 or 2 ACEs                         | 1.22 (0.79–1.89)                                                                |
|                               |                          |                  | 3 or 4 ACEs                         | 1.29 (0.82–2.02)                                                                |
|                               |                          |                  | 5 or more ACEs                      | 1.46 (0.95–2.26)                                                                |
|                               |                          | Low birthweight  | ACE scores (continuous)             | 1.08, (1.03–1.15)                                                               |
|                               |                          |                  | 1 or 2 ACEs                         | 0.98 (0.62–1.56)                                                                |
|                               |                          |                  | 3 or 4 ACEs                         | 1.22 (0.76–1.96)                                                                |
|                               |                          |                  | 5 or more ACEs                      | 1.39 (0.88–2.19)                                                                |
|                               |                          | Pregnancy loss   | ACE scores (continuous)             | 1.12, (1.08–1.17)                                                               |
|                               |                          |                  | 1 or 2 ACEs                         | 0.93 (0.66–1.31)                                                                |
|                               |                          |                  | 3 or 4 ACEs                         | 1.27 (0.89–1.80)                                                                |
|                               |                          |                  | 5 or more ACEs                      | 1.27 (0.89–1.80)                                                                |
| 14                            | Cammack et al., 2018     | Low Birth Weight | Emotional Abuse                     | 0.88 (0.66–1.00) Cohen's Kappas (95% CI)                                        |
|                               |                          |                  | Physical Abuse                      | 0.50 (0.01–0.99)                                                                |
|                               |                          |                  | Sexual Abuse                        | 0.75 (0.43–1.00)                                                                |
|                               |                          |                  | Emotional Neglect                   | 0.59 (0.18–1.00)                                                                |
|                               |                          |                  | Physical Neglect                    | 0.28 (–0.16–0.73)                                                               |

|    |                         |                                          |                   |                                                                                                                                                                                                                                                                   |
|----|-------------------------|------------------------------------------|-------------------|-------------------------------------------------------------------------------------------------------------------------------------------------------------------------------------------------------------------------------------------------------------------|
|    |                         | Preterm Birth                            | Emotional Abuse   | 0.78 (0.55–1.00)                                                                                                                                                                                                                                                  |
|    |                         |                                          | Physical Abuse    | 0.69 (0.36–1.00)                                                                                                                                                                                                                                                  |
|    |                         |                                          | Sexual Abuse      | 0.78 (0.55–1.00)                                                                                                                                                                                                                                                  |
|    |                         |                                          | Emotional Neglect | 0.44 (0.12–0.77)                                                                                                                                                                                                                                                  |
|    |                         |                                          | Physical Neglect  | 0.39 (–0.03–0.81)                                                                                                                                                                                                                                                 |
|    |                         | NICU Admission                           | Emotional Abuse   | 0.58 (0.25–0.91)                                                                                                                                                                                                                                                  |
|    |                         |                                          | Physical Abuse    | 0.28 (–0.15–0.71)                                                                                                                                                                                                                                                 |
|    |                         |                                          | Sexual Abuse      | 0.73 (0.45–1.00)                                                                                                                                                                                                                                                  |
|    |                         |                                          | Emotional Neglect | 0.55 (0.20–0.90)                                                                                                                                                                                                                                                  |
|    |                         |                                          | Physical Neglect  | 0.55 (0.20–0.90)                                                                                                                                                                                                                                                  |
| 16 | Ben Salah et al, 2019   | Preterm Birth<br>Low birth weight        | ACEs continuous   | After adjustment for high-risk pregnancies, environmental tobacco smoke, and intra-familial ACEs, the risk of premature birth was significantly associated with exposure to collective violence ( $P < 0.001$ ) and witnessing community violence ( $P < 0.05$ ). |
| 17 | Bhengu et al., 2019     | Preterm Birth                            | ACEs continuous   | 1.21, (1.03-1.43)                                                                                                                                                                                                                                                 |
| 18 | Gillespie et al. (2017) | Birth timing                             | ACEs continuous   | Cumulative childhood stress predicted birth timing ( $p = 0.01$ ).                                                                                                                                                                                                |
| 19 | Leeners et al, 2014     | Preterm Birth                            |                   | CSA, physical abuse as well as other ACE were associated with an increased risk for premature delivery                                                                                                                                                            |
| 21 | Shaikh et al., 2019     | Preterm Birth                            | ACEs continuous   | We found no association between ACE and preterm birth                                                                                                                                                                                                             |
| 22 | Smith et al., 2016      | Birth weight and shorter gestational age | ACEs continuous   | Each additional ACE decreased birth weight by 16.33 g and decreased gestational age by 0.063.                                                                                                                                                                     |
| 32 | Hardcastle et al., 2022 | Preterm Birth                            | 1 ACE             | 0.80 (0.32-2.00)                                                                                                                                                                                                                                                  |
|    |                         |                                          | 2–3 ACEs          | 1.17 (0.46-2.97)                                                                                                                                                                                                                                                  |
|    |                         |                                          | ≥4 ACEs           | 2.67 (1.14-6.23)                                                                                                                                                                                                                                                  |

304

305

1  
2  
3 306 Harville et al reported that violence exposure during childhood was associated with an  
4  
5 307 increased risk of low birth weight (adjusted OR= 1.5; 95% CI: 1.1-2.0). They also found that  
6  
7 308 violence/mental health issues (adjusted OR=1.4, 95% CI:1.1-1.9) and issues of family  
8  
9 309 structure increased the risk of low birth weight (adjusted OR=1.4, 95% CI:1.1-1.9). A study  
10  
11 310 by Smith et al. reported that each additional ACE decreased gestational age at birth as well as  
12  
13 311 birth weight. [53]  
14  
15

16  
17 312 Meta-analytic results for maternal ACEs and adverse pregnancy outcomes:  
18  
19

20 313 A total of 12 studies were available for this quality-effects meta-analysis, which produced an  
21  
22 314 association between maternal ACEs and any adverse pregnancy outcomes (OR=1.31, 95% CI:  
23  
24 315 1.17-1.47). In a sub-analysis of eight studies (59,607 participants), the quality-effects meta-  
25  
26 316 analysis showed an association between maternal ACEs and preterm birth (OR=1.41, 95% CI:  
27  
28 317 1.16-1.71). On the other hand, three studies (7,014 participants) were available for the quality-  
29  
30 318 effects meta-analysis for low birth weight, which showed an association between maternal  
31  
32 319 ACEs and low birth weight (OR=1.27, 95% CI: 1.17-1.47) (**Figure-3**). In low (one to three  
33  
34 320 ACEs) and high (four+) ACEs specific analysis, five studies reported low ACEs exposure and  
35  
36 321 nine studies reported high ACEs exposure. Both low (OR=1.27, 95% CI: 1.05-1.54) and high  
37  
38 322 (OR=1.41, 95% CI: 1.20-1.65) ACE exposure showed a significant association with any  
39  
40 323 adverse pregnancy outcome. For each additional unit increase in the number of ACEs, the odds  
41  
42 324 of adverse pregnancy outcomes increased 1.10 times (OR=1.10, 95% CI: 1.05-1.15)  
43  
44 325 (**Supplementary figure S2.1 and 2.2**).  
45  
46  
47  
48  
49  
50  
51 326

52  
53 327 **Discussion**  
54  
55

56 328 This systematic review and meta-analysis found that maternal ACEs were associated with an  
57  
58 329 increased risk of pregnancy complications including GDM, HDP, GWG and mental health  
59  
60

1  
2  
3 330 during pregnancy. Similarly, this study also found that maternal ACEs were associated with an  
4  
5 331 increased risk of adverse pregnancy outcomes including preterm birth and low birth weight.  
6  
7 332 All these associations were stronger for 4 or more compared to less than 4 ACEs. There was  
8  
9 333 a dose-response association between ACEs and adverse pregnancy outcome. Overall, findings  
10  
11 334 of this study suggest there is a robust association between ACEs and pregnancy complications  
12  
13 335 and adverse pregnancy outcomes. Early prevention of ACEs might reduce the risk of pregnancy  
14  
15 336 complications and adverse outcomes.

16  
17  
18  
19 337 To our knowledge, this is the first systematic review and meta-analysis to assess the association  
20  
21 338 between ACEs and pregnancy complications and adverse pregnancy outcomes. A recent  
22  
23 339 systematic review and meta-analysis reported an association between ACEs and maternal  
24  
25 340 depression and/or anxiety in the perinatal period (pregnancy to 1-year postpartum). [22] though  
26  
27 341 the results of our study are not directly comparable to this study because outcomes were  
28  
29 342 considered at different perinatal windows and results were presented differently (e.g., effect  
30  
31 343 size vs. odds ratio). Our results on maternal ACEs and increased risk of adverse pregnancy  
32  
33 344 outcomes are more comprehensive than previous systematic reviews [58] [59] [18] due to the  
34  
35 345 availability of 12 recent primary studies. Overall, the direction and strength of the associations  
36  
37 346 in our study is similar to these earlier studies [58] [59] [18].

38  
39  
40  
41 347 There could be several potential direct and indirect pathways to explain the relationship  
42  
43 348 between ACEs and pregnancy complications and adverse pregnancy outcomes. Direct  
44  
45 349 mechanisms may include altering the regulation of stress-signalling pathways [60] and immune  
46  
47 350 system function[61]; changing brain structure and function; and changing the expression of  
48  
49 351 DNA and by accelerating cellular ageing[62].For example, abuse or neglect might directly lead  
50  
51 352 to malnutrition. Similarly, stress can directly lead to dysregulation of the  
52  
53 353 hypothalamicpituitary-adrenal axis and associated neuro-endocrine-immune[63] as well as  
54  
55 354 epigenetic effects[64]. Results from animal models [65, 66] and longitudinal human studies

1  
2  
3 355 such as the Nurses' Health Study [35] have proposed that a strong history of ACEs may alter  
4  
5 356 hypothalamic-pituitary-adrenal axis as reflected by elevated cortisol levels that in turn alter  
6  
7 357 glucose metabolism and body weight regulation. Brain development begins in fetal life and  
8  
9  
10 358 continues into early adulthood. Early life maternal ACEs may alter the structure and function  
11  
12 359 of the brain.[67, 68] These neurodevelopmental alterations may result in neuroendocrine  
13  
14 360 disruption of cortisol regulation, linked to glucose metabolism [69, 70]. The experience of  
15  
16 361 ACEs increased the risk of physical or sexual abuse during pregnancy and is associated with  
17  
18 362 placental damage, uterine contractions, premature rupture of membranes, and genitourinary  
19  
20 363 infections which ultimately increase the risk of preterm birth and low birth weight[71].  
21  
22 364 Exposure to ACEs is also associated with an increased risk of health risk behaviours including  
23  
24 365 substance use, physical inactivity and unhealthy diet[4]. Previous research has shown that  
25  
26 366 ACEs are associated with pre-pregnancy obesity.[72] In addition, it is also established that  
27  
28 367 socioeconomic status and cumulative disadvantage produces health disparities across the life  
29  
30 368 course[73]. Any of these mechanisms could explain the transgenerational nature of obesity and  
31  
32 369 diabetes in families affected by maternal ACEs. Chronic inflammation, unhealthy behaviours,  
33  
34 370 poor sleep and altered stress regulatory pathways are risk factors for adverse pregnancy  
35  
36 371 complications, including GDM, HDP and depression/anxiety [74, 75]. The interplay of these  
37  
38 372 different pathways remains largely unclear.  
39  
40  
41  
42  
43  
44  
45  
46  
47

48 374 According to our findings and other systematic review evidence, it may be valuable to assess  
49  
50 375 the role of routine ACEs screening during pregnancy to improve maternal and child health.  
51  
52 376 Trauma-informed care is not well incorporated into clinical practice guidelines. Much of the  
53  
54 377 emphasis in maternity care is on individual behaviour change, including advice about diet,  
55  
56 378 exercise, smoking cessation and uptake of clinical care. Approaches that do not incorporate the  
57  
58 379 personal experiences of trauma by women attending antenatal services may inadvertently cause  
59  
60

1  
2  
3 380 iatrogenic harm. For many years, there has been an interest in improving pregnancy outcomes  
4  
5 381 by focusing on a limited set of physical parameters that can easily be measured such as  
6  
7 382 gestational weight gain, without attention to the underlying mechanisms.[76, 77] Overall,  
8  
9 383 studies of diet and exercise in pregnancy to reduce GDM, HDP and other adverse pregnancy  
10  
11 384 outcomes have been disappointing.[78]

12  
13  
14  
15 385 A recent scoping review by Tran et al.[79] found that healthcare providers perceive that they  
16  
17 386 are not being trained to screen for ACEs in their undergraduate training program or in their  
18  
19 387 professional training in clinical settings. In addition, healthcare workers already have a high  
20  
21 388 demand on their time and limited capacity to incorporate new practices without additional  
22  
23 389 resources. There is some controversy about whether screening for ACEs is a safe and ethical  
24  
25 390 practice, especially if the consequences of discussing ACEs (e.g. effects on mental health)  
26  
27 391 cannot be readily addressed[80, 81]. These identified barriers are similar to those reported by  
28  
29 392 healthcare providers in relation to ACE screening in general clinical settings[82]. Healthcare  
30  
31 393 providers may appreciate the importance of asking about ACEs to help raise issues that  
32  
33 394 otherwise would be unknown and unaddressed[79]. , Furthermore, Mishra et al[83] found that  
34  
35 395 ACEs screening did not excessively disrupt clinic workflow. and was both acceptable for the  
36  
37 396 patient and feasible for the provider. However, to determine if screening for ACEs is  
38  
39 397 worthwhile, studies need to assess if trauma-informed clinical care translates to improved  
40  
41 398 clinical outcomes for mother and offspring. [84] Beyond screening for ACEs, our findings  
42  
43 399 emphasise the importance of preventing ACEs in children to reduce immediate impacts as well  
44  
45 400 as intergenerational transmission of ACEs. As well as supporting clinicians and providing  
46  
47 401 services to address ACEs, there is growing awareness of the crucial role of upstream policy-  
48  
49 402 and community-level interventions to improve and support positive family and social  
50  
51 403 environments and a need for wide-scale testing of the effectiveness of such  
52  
53 404 interventions[85][86].  
54  
55  
56  
57  
58  
59  
60

1  
2  
3 405 There are some limitations to the current study, which reduce the generalisability of the  
4  
5 406 findings. Firstly, most of the included studies are from high-income western countries.  
6  
7 407 Secondly, due to the lack of data, we could not conduct the ACEs item-specific analysis.  
8  
9 408 Thirdly, the dose-response relationship in all studies could not be assessed as different studies  
10  
11 409 use different screening tools and cut-off values. Only five studies exploring pregnancy  
12  
13 410 complications and five studies investigating adverse pregnancy outcomes could be assessed for  
14  
15 411 a dose response relationship. Lastly, as we considered various types of ACE exposures in a  
16  
17 412 single review, we expected much heterogeneity in the study methodologies, populations,  
18  
19 413 exposures, and outcome identification. To address these limitations, the Quality Effect model,  
20  
21 414 which incorporates the heterogeneity of effects across the studies and reduces the risk-of-bias  
22  
23 415 assessment was used in the meta-analysis. Nevertheless, our study has several strengths  
24  
25 416 considering the comprehensive nature of the inclusion criteria, including relevant studies  
26  
27 417 published up to July 2021. In addition, we assessed the methodological quality of studies using  
28  
29 418 standard tools appropriate for observational cohort and cross-sectional studies.  
30  
31  
32  
33  
34  
35

## 36 419 **Conclusion**

37  
38  
39 420 In conclusion, this systematic review and meta-analysis found that exposure to ACEs  
40  
41 421 increases the risk of pregnancy complications and adverse pregnancy outcomes.  
42  
43 422 Identification of women exposed to ACEs and personalising their care may provide  
44  
45 423 opportunities to improve maternal and child mental and physical health.  
46  
47  
48

## 49 424 **Contribution to authorship**

50  
51  
52 425 AAM and TB contributed towards literature search, data analysis and interpretation, figures  
53  
54 426 and tables, and writing of the manuscript. AAM, TB, LC, JS, PS contributed towards the  
55  
56 427 drafting of the protocol, review of the study design, data collection and interpretation and  
57  
58 428 provided a critical review of the manuscript. AAM and SD contributed towards data  
59  
60

1  
2  
3 429 management and analysis plan and provided oversight and interpretation of the analyses. AAM,  
4  
5 430 DM, KT, FB, MN, MM, KM, AK, LH contributed towards the study design and editing. AAM  
6  
7 431 and LC contributed towards the design of the manuscript, development of the protocol, and  
8  
9 432 critical evaluation and interpretation of the results and critical review of the manuscript.  
10  
11  
12

### 13 433 **Disclosure of interests**

14  
15  
16 434 All other authors declare no competing interests.  
17  
18  
19 435

### 20 21 436 **Details of ethics approval**

22  
23  
24  
25 437 None  
26  
27 438

### 28 29 439 **Funding**

30  
31  
32  
33 440 None  
34  
35

### 36 441 **Acknowledgement**

37  
38  
39 442 This research was partially supported by the Australian Research Council Centre of  
40  
41 443 Excellence for Children and Families over the Life Course.  
42  
43  
44 444



1  
2  
3  
4  
5  
6  
7  
8  
9  
10  
11  
12  
13  
14  
15  
16  
17  
18  
19  
20  
21  
22  
23  
24  
25  
26  
27  
28  
29  
30  
31  
32  
33  
34  
35  
36  
37  
38  
39  
40  
41  
42  
43  
44  
45  
46  
47  
48  
49  
50  
51  
52  
53  
54  
55  
56  
57  
58  
59  
60

445  
446

For peer review only

1  
2  
3 447 **Figure-1: PRISMA diagram outlining the search strategy and selection of studies**  
4 448 **included in this review.**  
5

6 449 **Figure-2: Association of any ACE exposure with risk of pregnancy complications**  
7

8 450 **Figure-3: Association of any ACE exposure and adverse pregnancy outcomes**  
9

10 451  
11  
12

13 452  
14  
15

16 453  
17  
18  
19  
20  
21  
22  
23  
24  
25  
26  
27  
28  
29  
30  
31  
32  
33  
34  
35  
36  
37  
38  
39  
40  
41  
42  
43  
44  
45  
46  
47  
48  
49  
50  
51  
52  
53  
54  
55  
56  
57  
58  
59  
60

For peer review only

## References:

1. Atzl, V.M., et al., *Adverse childhood experiences and prenatal mental health: Type of ACEs and age of maltreatment onset*. Journal of family psychology, 2019. **33**(3): p. 304.
2. Hughes, K., et al., *The effect of multiple adverse childhood experiences on health: a systematic review and meta-analysis*. The Lancet Public Health, 2017. **2**(8): p. e356-e366.
3. Wickramasinghe, Y.M., et al., *Burden of adverse childhood experiences in children attending paediatric clinics in South Western Sydney, Australia: a retrospective audit*. BMJ paediatrics open, 2019. **3**(1).
4. Felitti, V.J., et al., *Relationship of childhood abuse and household dysfunction to many of the leading causes of death in adults: The Adverse Childhood Experiences (ACE) Study*. American journal of preventive medicine, 1998. **14**(4): p. 245-258.
5. Petruccelli, K., J. Davis, and T. Berman, *Adverse childhood experiences and associated health outcomes: A systematic review and meta-analysis*. Child abuse & neglect, 2019. **97**: p. 104127.
6. Schroeder, K., et al., *The association between adverse childhood experiences and childhood obesity: A systematic review*. Obesity Reviews, 2021. **22**(7): p. e13204.
7. Kuh, D., et al., *Life course epidemiology*. Journal of epidemiology and community health, 2003. **57**(10): p. 778.
8. Stanhope, K.K., et al., *Adverse childhood experiences and lifetime adverse maternal outcomes (gestational diabetes and hypertensive disorders of pregnancy) in the Hispanic Community Health Study/Study of Latinos*. Annals of Epidemiology, 2020. **50**: p. 1-6.
9. Schetter, C.D. and L. Tanner, *Anxiety, depression and stress in pregnancy: implications for mothers, children, research, and practice*. Current opinion in psychiatry, 2012. **25**(2): p. 141.
10. Olsen, J.M., *Integrative review of pregnancy health risks and outcomes associated with adverse childhood experiences*. Journal of Obstetric, Gynecologic & Neonatal Nursing, 2018. **47**(6): p. 783-794.
11. Dachew, B.A., et al., *Association between hypertensive disorders of pregnancy and the development of offspring mental and behavioural problems: a systematic review and meta-analysis*. Psychiatry research, 2018. **260**: p. 458-467.
12. Montgomery, E., C. Pope, and J. Rogers, *A feminist narrative study of the maternity care experiences of women who were sexually abused in childhood*. Midwifery, 2015. **31**(1): p. 54-60.
13. Montgomery, E., C. Pope, and J. Rogers, *The re-enactment of childhood sexual abuse in maternity care: a qualitative study*. BMC pregnancy and childbirth, 2015. **15**(1): p. 1-7.
14. Lê-Scherban, F., et al., *Intergenerational associations of parent adverse childhood experiences and child health outcomes*. Pediatrics, 2018. **141**(6).
15. Schoenaker, D.A., L.K. Callaway, and G.D. Mishra, *The role of childhood adversity in the development of gestational diabetes*. American journal of preventive medicine, 2019. **57**(3): p. 302-310.
16. Versteegen, M., et al., *Maternal depression, adverse childhood experiences, and social support in relation to gestational diabetes risk: results from the Albany Infant and Mother Study (AIMS)*. BMC Pregnancy and Childbirth, 2021. **21**(1): p. 1-7.
17. Sulaiman, S., et al., *Total Adverse Childhood Experiences and Preterm Birth: A Systematic Review*. Maternal and Child Health Journal, 2021: p. 1-14.
18. Nesari, M., et al., *Does a maternal history of abuse before pregnancy affect pregnancy outcomes? A systematic review with meta-analysis*. BMC pregnancy and childbirth, 2018. **18**(1): p. 1-11.
19. Shamseer, L., et al., *Preferred reporting items for systematic review and meta-analysis protocols (PRISMA-P) 2015: elaboration and explanation*. Bmj, 2015. **349**.
20. Stroup, D.F., et al., *Meta-analysis of observational studies in epidemiology: a proposal for reporting*. Jama, 2000. **283**(15): p. 2008-2012.

- 1
  - 2
  - 3
  - 4
  - 5
  - 6
  - 7
  - 8
  - 9
  - 10
  - 11
  - 12
  - 13
  - 14
  - 15
  - 16
  - 17
  - 18
  - 19
  - 20
  - 21
  - 22
  - 23
  - 24
  - 25
  - 26
  - 27
  - 28
  - 29
  - 30
  - 31
  - 32
  - 33
  - 34
  - 35
  - 36
  - 37
  - 38
  - 39
  - 40
  - 41
  - 42
  - 43
  - 44
  - 45
  - 46
  - 47
  - 48
  - 49
  - 50
  - 51
  - 52
  - 53
  - 54
  - 55
  - 56
  - 57
  - 58
  - 59
  - 60
21. <https://www.nichd.nih.gov/health/topics/pregnancy>.
22. Racine, N., et al., *Adverse childhood experiences and maternal anxiety and depression: a meta-analysis*. BMC psychiatry, 2021. **21**(1): p. 1-10.
23. Shor, E., D. Roelfs, and Z.M. Vang, *The "Hispanic mortality paradox" revisited: meta-analysis and meta-regression of life-course differentials in Latin American and Caribbean immigrants' mortality*. Social Science & Medicine, 2017. **186**: p. 20-33.
24. Borenstein, M., et al., *Basics of meta-analysis: I2 is not an absolute measure of heterogeneity*. Research synthesis methods, 2017. **8**(1): p. 5-18.
25. Furuya-Kanamori, L., J.J. Barendregt, and S.A.R. Doi, *A new improved graphical and quantitative method for detecting bias in meta-analysis*. International journal of evidence-based healthcare, 2018. **16**(4): p. 195-203.
26. Barendregt, J.J. and S.A. Doi, *MetaXL user guide version 5.3*. EpiGear International Pty Ltd, 2016.
27. Fredriksen, E., et al., *Patterns of pregnancy and postpartum depressive symptoms: Latent class trajectories and predictors*. Journal of Abnormal Psychology, 2017. **126**(2): p. 173.
28. Hantsoo, L., et al., *Childhood adversity impact on gut microbiota and inflammatory response to stress during pregnancy*. Brain, behavior, and immunity, 2019. **75**: p. 240-250.
29. Howell, K.H., et al., *Relational resilience as a potential mediator between adverse childhood experiences and prenatal depression*. Journal of health psychology, 2020. **25**(4): p. 545-557.
30. Letourneau, N., et al., *Intergenerational transmission of adverse childhood experiences via maternal depression and anxiety and moderation by child sex*. Journal of developmental origins of health and disease, 2019. **10**(1): p. 88-99.
31. Narayan, A.J., et al., *Positive childhood experiences predict less psychopathology and stress in pregnant women with childhood adversity: A pilot study of the benevolent childhood experiences (BCEs) scale*. Child abuse & neglect, 2018. **78**: p. 19-30.
32. Racine, N., et al., *Perinatal depression: the role of maternal adverse childhood experiences and social support*. Journal of affective disorders, 2020. **263**: p. 576-581.
33. Young-Wolff, K.C., et al., *Adverse childhood experiences and mental and behavioral health conditions during pregnancy: the role of resilience*. Journal of Women's Health, 2019. **28**(4): p. 452-461.
34. Christiaens, I., K. Hegadoren, and D.M. Olson, *Adverse childhood experiences are associated with spontaneous preterm birth: a case-control study*. BMC medicine, 2015. **13**(1): p. 1-9.
35. Mason, S.M., et al., *Abuse in Childhood or Adolescence and Gestational Diabetes: a retrospective cohort study*. American journal of preventive medicine, 2016. **50**(4): p. 436-444.
36. McDonnell, C.G. and K. Valentino, *Intergenerational effects of childhood trauma: evaluating pathways among maternal ACEs, perinatal depressive symptoms, and infant outcomes*. Child maltreatment, 2016. **21**(4): p. 317-326.
37. Appleton, A.A., et al., *Social support during pregnancy modifies the association between maternal adverse childhood experiences and infant birth size*. Maternal and child health journal, 2019. **23**(3): p. 408-415.
38. Salah, A.B., et al., *Impact of social violence and childhood adversities on pregnancy outcomes: a longitudinal study in Tunisia*. Journal of global health, 2019. **9**(2).
39. Bhengu, B.S., et al., *The role of adverse childhood experiences on perinatal substance use behaviour in KwaZulu-Natal Province, South Africa*. AIDS and Behavior, 2020. **24**(6): p. 1643-1652.
40. Shaikh, K., et al., *Ethnic disparity and exposure to supplements rather than adverse childhood experiences linked to preterm birth in Pakistani women*. Journal of affective disorders, 2020. **267**: p. 49-56.
41. Barrios, Y.V., et al., *Association of childhood physical and sexual abuse with intimate partner violence, poor general health and depressive symptoms among pregnant women*. PloS one, 2015. **10**(1): p. e0116609.

- 1
- 2
- 3
- 4 42. Mersky, J.P. and C.P. Lee, *Adverse childhood experiences and poor birth outcomes in a diverse, low-income sample*. BMC pregnancy and childbirth, 2019. **19**(1): p. 1-7.
- 5
- 6 43. Do, H.P., et al., *Intergenerational effects of violence on women's perinatal wellbeing and infant health outcomes: evidence from a birth cohort study in Central Vietnam*. BMC pregnancy and childbirth, 2021. **21**(1): p. 1-14.
- 7
- 8
- 9 44. Grimstad, H. and B. Schei, *Pregnancy and delivery for women with a history of child sexual abuse*. Child abuse & neglect, 1999. **23**(1): p. 81-90.
- 10
- 11 45. Noll, J.G., et al., *Differential pathways to preterm delivery for sexually abused and comparison women*. Journal of pediatric psychology, 2007. **32**(10): p. 1238-1248.
- 12
- 13 46. Leeners, B., et al., *Risk factors for unfavorable pregnancy outcome in women with adverse childhood experiences*. Journal of Perinatal Medicine, 2014. **42**(2): p. 171-178.
- 14
- 15 47. Selk, S.C., et al., *An observational study of type, timing, and severity of childhood maltreatment and preterm birth*. J Epidemiol Community Health, 2016. **70**(6): p. 589-595.
- 16
- 17 48. Harville, E.W., et al., *Childhood hardship, maternal smoking, and birth outcomes: a prospective cohort study*. Archives of pediatrics & adolescent medicine, 2010. **164**(6): p. 533-539.
- 18
- 19 49. Miller, G.E., et al., *Mothers' childhood hardship forecasts adverse pregnancy outcomes: role of inflammatory, lifestyle, and psychosocial pathways*. Brain, behavior, and immunity, 2017. **65**: p. 11-19.
- 20
- 21
- 22
- 23 50. Cammack, A.L., et al., *An exploratory study of whether pregnancy outcomes influence maternal self-reported history of child maltreatment*. Child abuse & neglect, 2018. **85**: p. 145-155.
- 24
- 25
- 26
- 27 51. Bala, K., et al., *The Association between Adverse Childhood Experiences and Diabetes Status during Pregnancy among Women in Rhode Island, 2016-2018*. Rhode Island Medical Journal, 2020. **103**(9): p. 52-55.
- 28
- 29
- 30 52. Gillespie, S.L., et al., *Childhood stress and birth timing among African American women: Cortisol as biological mediator*. Psychoneuroendocrinology, 2017. **84**: p. 32-41.
- 31
- 32 53. Smith, M.V., N. Gotman, and K.A. Yonkers, *Early childhood adversity and pregnancy outcomes*. Maternal and child health journal, 2016. **20**(4): p. 790-798.
- 33
- 34 54. Ranchod, Y.K., et al., *Maternal childhood adversity, prepregnancy obesity, and gestational weight gain*. American journal of preventive medicine, 2016. **50**(4): p. 463-469.
- 35
- 36 55. Hardcastle, K., K. Ford, and M.A. Bellis, *Maternal adverse childhood experiences and their association with preterm birth: secondary analysis of data from universal health visiting*. BMC pregnancy and childbirth, 2022. **22**(1): p. 1-11.
- 37
- 38 56. Schoenaker, D.A.J.M., L.K. Callaway, and G.D. Mishra, *The Role of Childhood Adversity in the Development of Gestational Diabetes*. American Journal of Preventive Medicine, 2019. **57**(3): p. 302-310.
- 39
- 40
- 41
- 42
- 43 57. Bhengu, B.S., et al., *The role of adverse childhood experiences on perinatal substance use behaviour in KwaZulu-Natal Province, South Africa*. AIDS and Behavior, 2019: p. 1-10.
- 44
- 45 58. Leeners, B., et al., *Influence of childhood sexual abuse on pregnancy, delivery, and the early postpartum period in adult women*. Journal of psychosomatic research, 2006. **61**(2): p. 139-151.
- 46
- 47
- 48
- 49 59. Wosu, A.C., B. Gelaye, and M.A. Williams, *Maternal history of childhood sexual abuse and preterm birth: an epidemiologic review*. BMC pregnancy and childbirth, 2015. **15**(1): p. 1-9.
- 50
- 51 60. Elwenspoek MMC, Kuehn A, Muller CP, Turner JD. *The effects of early life adversity on the immune system*. Psychoneuroendocrinology 2017;82:140-54.
- 52
- 53 61. Bick J, Zhu T, Stamoulis C, Fox NA, Zeanah C, Nelson CA. *Effect of early institutionalization and foster care on long-term white matter development: a randomized clinical trial*. JAMA Pediatr 2015;169:211-9.
- 54
- 55 62. Marini S, Davis KA, Soare TW, et al. *Adversity exposure during sensitive periods predicts accelerated epigenetic aging in children*. Psychoneuroendocrinology 2020;113:104484.
- 56
- 57
- 58
- 59
- 60

- 1  
2  
3 63. Danese, A., *The hidden wounds of childhood trauma: Psychoneuroimmunology of early stress and the impact on mental health*. Brain and Neuroscience Advances, 2017. **1**: p. 345-346.
- 4 64. Thaler L, Steiger H. *Eating disorders and epigenetics*. Adv Exp Med Biol 2017;978:93-103. .
- 5 65. Sadeghimahalli, F., H. Zardooz, and R. Golchoobian, *Early postnatal hypothalamic-pituitary-adrenal axis activity and reduced insulin sensitivity in adult rats*. Endocrine regulations, 2019. **53**(4): p. 213-220.
- 6  
7  
8 66. Chen, Y.-T., et al., *Excessive glucocorticoids during pregnancy impair fetal brown fat development and predispose offspring to metabolic dysfunctions*. Diabetes, 2020. **69**(8): p. 1662-1674.
- 9  
10 67. Bick, J. and C.A. Nelson, *Early adverse experiences and the developing brain*. Neuropsychopharmacology, 2016. **41**(1): p. 177-196.
- 11 68. Kornmeier, J. and M. Bach, *Ambiguous figures—what happens in the brain when perception changes but not the stimulus*. Frontiers in human neuroscience, 2012. **6**: p. 51.
- 12 69. Nusslock, R. and G.E. Miller, *Early-life adversity and physical and emotional health across the lifespan: A neuroimmune network hypothesis*. Biological psychiatry, 2016. **80**(1): p. 23-32.
- 13 70. Danese, A. and B.S. McEwen, *Adverse childhood experiences, allostasis, allostatic load, and age-related disease*. Physiology & behavior, 2012. **106**(1): p. 29-39.
- 14 71. Adcock, A., Bate, A., & Woodhouse, J. (2016). Effect of social media on the mental health of young people. Retrieved from <http://researchbriefings.parliament.uk/ResearchBriefing/Summary/CDP2016-0196>.
- 15 72. Hollingsworth, K., et al., *The association between maltreatment in childhood and pre-pregnancy obesity in women attending an antenatal clinic in Australia*. PLoS One, 2012. **7**(12): p. e51868.
- 16 73. Seabrook, J.A. and W.R. Avison, *Socioeconomic status and cumulative disadvantage processes across the life course: implications for health outcomes*. Canadian Review of Sociology/Revue canadienne de sociologie, 2012. **49**(1): p. 50-68.
- 17 74. Cornelius, D.C., et al., *Inflammatory mediators: a causal link to hypertension during preeclampsia*. British journal of pharmacology, 2019. **176**(12): p. 1914-1921.
- 18 75. Rodrigo, N. and S.J. Glastras, *The emerging role of biomarkers in the diagnosis of gestational diabetes mellitus*. Journal of clinical medicine, 2018. **7**(6): p. 120.
- 19 76. Dodd, J.M., et al., *Limiting weight gain in overweight and obese women during pregnancy to improve health outcomes: the LIMIT randomised controlled trial*. BMC pregnancy and Childbirth, 2011. **11**(1): p. 1-5.
- 20 77. Poston, L., et al., *Effect of a behavioural intervention in obese pregnant women (the UPBEAT study): a multicentre, randomised controlled trial*. The lancet Diabetes & endocrinology, 2015. **3**(10): p. 767-777.
- 21 78. in Pregnancy, T.I.W.M. and C. Group, *Effect of diet and physical activity based interventions in pregnancy on gestational weight gain and pregnancy outcomes: meta-analysis of individual participant data from randomised trials*. The BMJ, 2017. **358**.
- 22 79. Tran, N, Callaway L, Shen S, Biswas T, Scott J, Boyle F, Mamun AA. *Screening for adverse childhood experiences in antenatal care settings: A scoping review*. Aust N Z J Obstet Gynaecol. 2022 Jul 31. doi: 10.1111/ajo.13585. .
- 23 80. Gillespie RJ. *Screening for Adverse Childhood Experiences in Pediatric Primary Care: Pitfalls and Possibilities*. Pediatr Ann. 2019 Jul 1;48(7):e257-e261.
- 24 81. Campbell, T. L. (2020). *Screening for adverse childhood experiences (ACEs) in primary care: A cautionary note*. JAMA, 323(23), 2379-2380.
- 25 82. Ereyi-Osas Whitney, Racine Nicole, Sheri M. *Asking about adverse childhood experiences (ACEs) in prenatal and pediatric primary care: A Narrative Review and Critique 2020*.
- 26 83. Mishra, K., et al., *Screening for adverse childhood experiences in preventive medicine settings: a scoping review*. Journal of Public Health, 2021: p. 1-10.
- 27  
28  
29  
30  
31  
32  
33  
34  
35  
36  
37  
38  
39  
40  
41  
42  
43  
44  
45  
46  
47  
48  
49  
50  
51  
52  
53  
54  
55  
56  
57  
58  
59  
60

- 1  
2  
3 84. Gentry, S. and B. Paterson, *Does screening or routine enquiry for adverse childhood*  
4 *experiences (ACEs) meet criteria for a screening programme? A rapid evidence summary.*  
5 *Journal of Public Health*, 2021.  
6  
7 85. Courtin, E., et al., *The role of socioeconomic interventions in reducing exposure to Adverse*  
8 *Childhood Experiences: A systematic review.* *Current Epidemiology Reports*, 2019. **6**(4): p. 423-  
9 441.  
10 86. Gervin, D.W., et al., *Centers for Disease Control and Prevention investments in adverse*  
11 *childhood experience prevention efforts.* *American Journal of Preventive Medicine*, 2022.  
12 **62**(6): p. S1-S5.  
13  
14  
15  
16  
17  
18  
19  
20  
21  
22  
23  
24  
25  
26  
27  
28  
29  
30  
31  
32  
33  
34  
35  
36  
37  
38  
39  
40  
41  
42  
43  
44  
45  
46  
47  
48  
49  
50  
51  
52  
53  
54  
55  
56  
57  
58  
59  
60

For peer review only

1  
2  
3  
4  
5  
6  
7  
8  
9  
10  
11  
12  
13  
14  
15  
16  
17  
18  
19  
20  
21  
22  
23  
24  
25  
26  
27  
28  
29  
30  
31  
32  
33  
34  
35  
36  
37  
38  
39  
40  
41  
42  
43  
44  
45  
46  
47  
48  
49  
50  
51  
52  
53  
54  
55  
56  
57  
58  
59  
60

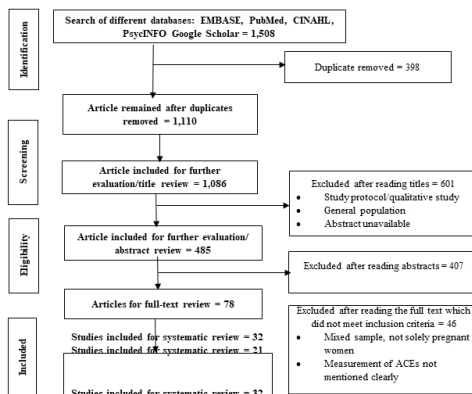

338x190mm (96 x 96 DPI)



1  
2  
3  
4  
5  
6  
7  
8  
9  
10  
11  
12  
13  
14  
15  
16  
17  
18  
19  
20  
21  
22  
23  
24  
25  
26  
27  
28  
29  
30  
31  
32  
33  
34  
35  
36  
37  
38  
39  
40  
41  
42  
43  
44  
45  
46  
47  
48  
49  
50  
51  
52  
53  
54  
55  
56  
57  
58  
59  
60

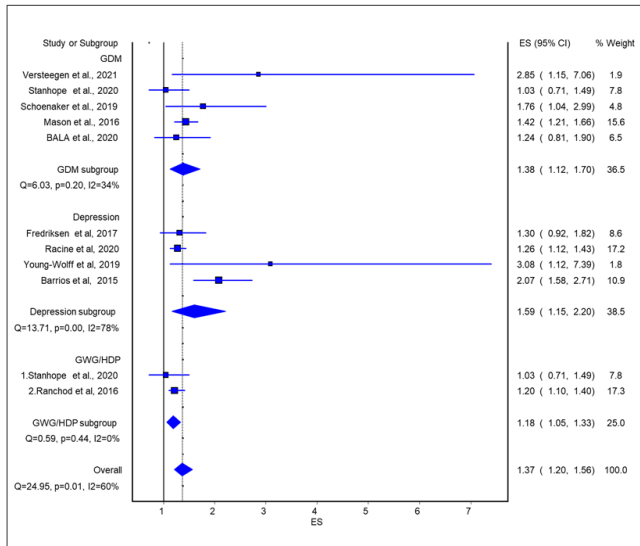

338x190mm (96 x 96 DPI)

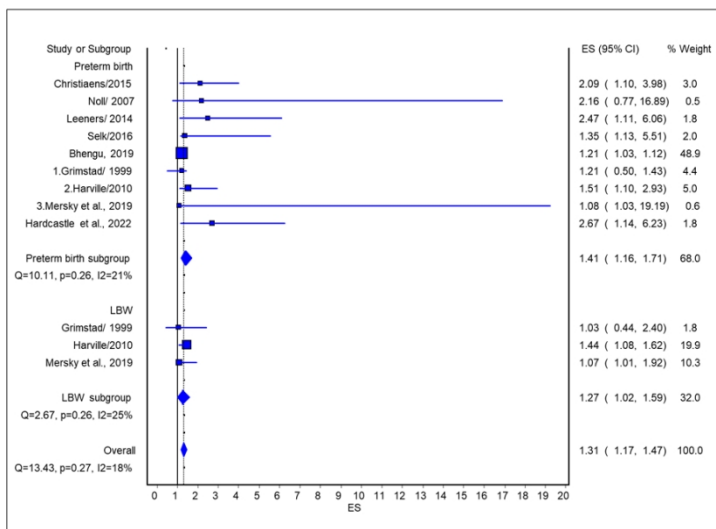

338x190mm (96 x 96 DPI)

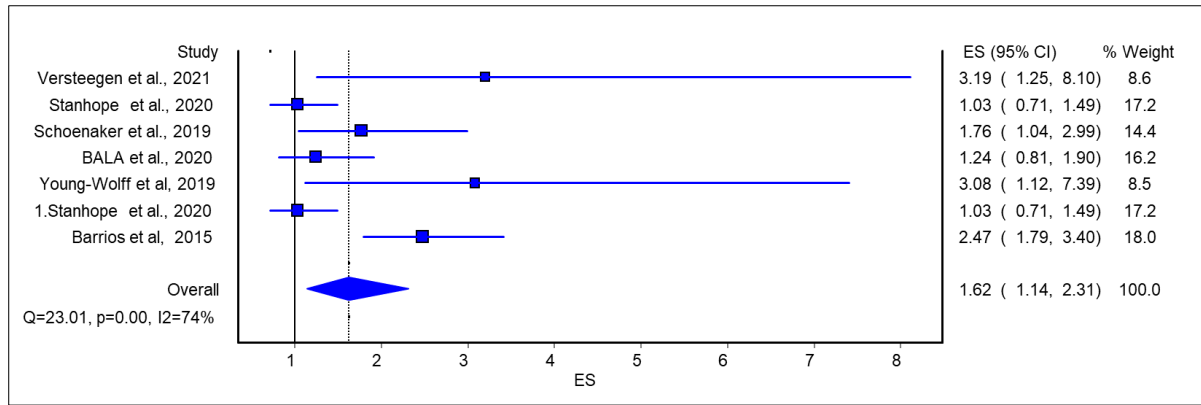

16  
17 **Supplementary figure -1.1: Association of  $\geq 4$  ACEs and adverse pregnancy complications**  
18  
19

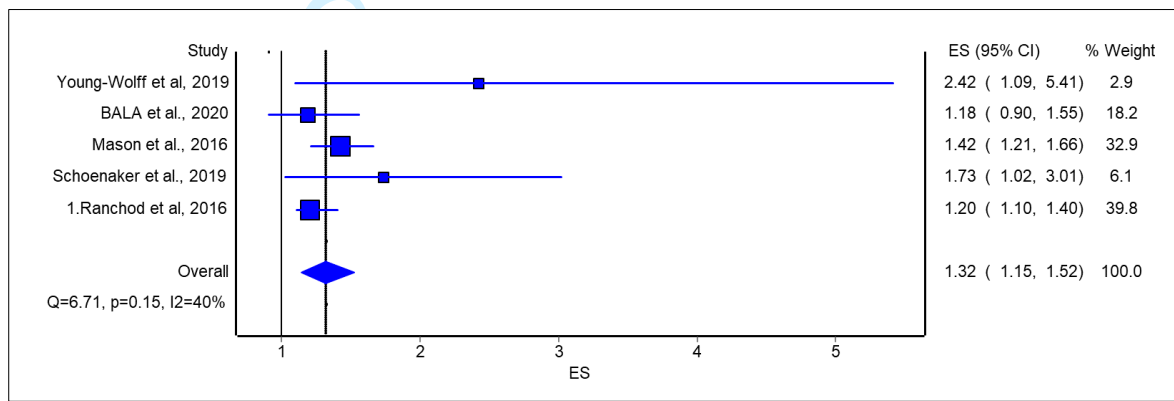

33 **Supplementary figure -1.2: Association of  $<4$  ACEs and adverse pregnancy complications**  
34  
35  
36  
37  
38  
39  
40  
41  
42  
43  
44  
45  
46  
47  
48  
49  
50  
51  
52  
53  
54  
55  
56  
57  
58  
59  
60

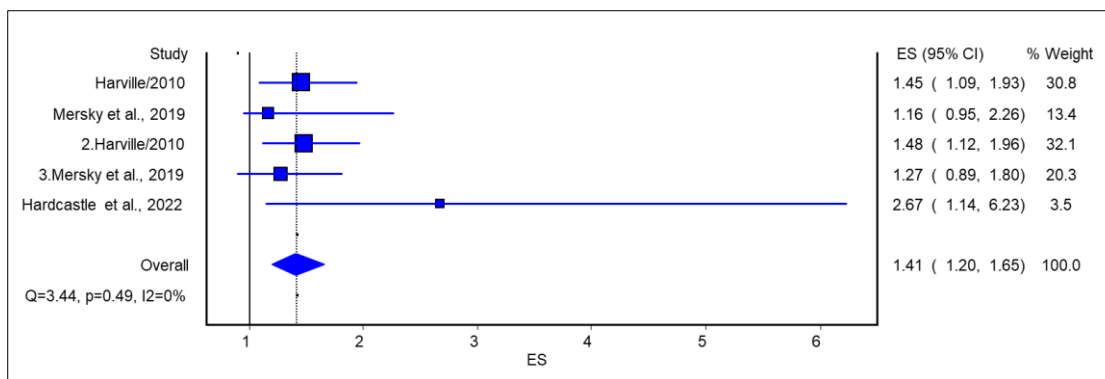

Supplementary figure -2.1: Association of  $\geq 4$  ACEs and adverse pregnancy outcomes

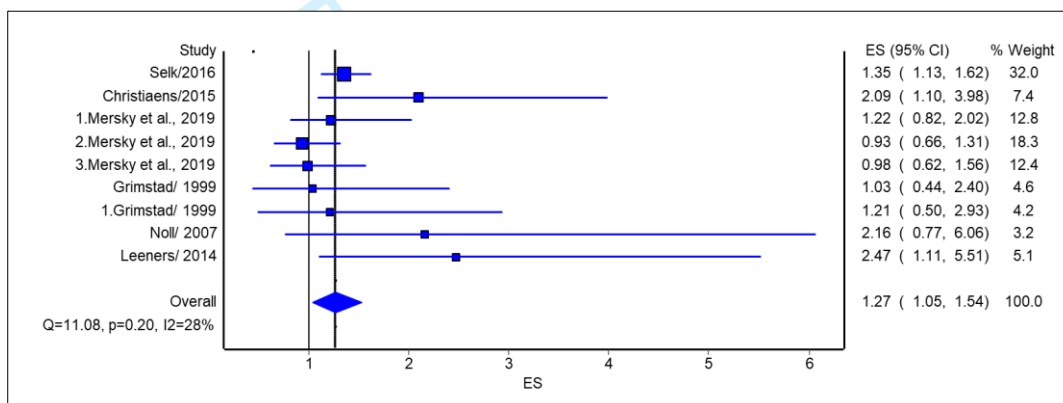

Supplementary figure -2.2: Association of  $< 4$  ACEs and adverse pregnancy outcomes

Supplementary Table S1: Search details

|                                | #  |                                                                                       |
|--------------------------------|----|---------------------------------------------------------------------------------------|
| <b>ACES</b>                    | 1  | 'Adverse childhood experiences'/exp OR 'adverse childhood experiences'                |
|                                | 2  | 'Childhood adversities'                                                               |
|                                | 3  | 'Childhood abuse'                                                                     |
|                                | 4  | 'Childhood maltreatment'                                                              |
|                                | 5  | 'Child trauma'                                                                        |
|                                | 6  | 'Adverse childhood events'                                                            |
|                                | 7  | 'Childhood sexual abuse'                                                              |
|                                | 8  | 'Childhood physical abuse'                                                            |
|                                | 9  | 'Childhood mental abuse'                                                              |
|                                | 10 | 'Childhood trauma'                                                                    |
|                                | 11 | 'Childhood violence'                                                                  |
|                                | 12 | 'Childhood hardship'                                                                  |
|                                | 13 | 'Childhood suffering'                                                                 |
|                                | 14 | 'Childhood stress'                                                                    |
|                                | 15 | #1 OR #2 OR #3 OR #4 OR #5 OR #6 OR #7 OR #8 OR #9 OR #10 OR #11 OR #12 OR #13 OR #14 |
| <b>Pregnancy complications</b> | 16 | 'Pregnancy complications'                                                             |
|                                | 17 | 'depression'                                                                          |
|                                | 18 | 'anxiety'                                                                             |
|                                | 19 | 'Prenatal depression'                                                                 |
|                                | 20 | 'Depressive symptoms'                                                                 |
|                                | 21 | 'Antenatal depression'                                                                |
|                                | 22 | 'Mental health problem'                                                               |
|                                | 23 | 'Gestational diabetes mellitus'                                                       |
|                                | 24 | 'GDM'                                                                                 |
|                                | 25 | 'Hypertensive disorder of pregnancy'                                                  |
|                                | 26 | 'HDP'                                                                                 |

|                           |    |                                                                                                                                                        |
|---------------------------|----|--------------------------------------------------------------------------------------------------------------------------------------------------------|
|                           | 27 | 'preeclampsia'                                                                                                                                         |
|                           | 28 | 'Maternal body weight'                                                                                                                                 |
|                           | 29 | 'Excess weight gain'                                                                                                                                   |
| <b>Pregnancy outcomes</b> | 30 | 'Abnormal fetal growth'                                                                                                                                |
|                           | 31 | 'Intrauterine growth restriction'                                                                                                                      |
|                           | 32 | 'Low birth weight'                                                                                                                                     |
|                           | 33 | 'LBW'                                                                                                                                                  |
|                           | 34 | 'IUGR'                                                                                                                                                 |
|                           | 35 | stillbirth                                                                                                                                             |
|                           | 36 | 'Small of gestational age'                                                                                                                             |
|                           | 37 | 'Preterm birth'                                                                                                                                        |
|                           | 38 | #16 OR #17 OR #18 OR #19 OR #20 OR #21 OR #22 OR #23 OR #24 OR #25 OR #26 OR #27 OR #28 OR #29 OR #30 OR #31 OR #32 OR #33 OR #34 OR #35 OR #36 OR #37 |
|                           | 39 | #15 AND #38                                                                                                                                            |

**Supplementary Table S2: Quality assessment tools**

| <b>Study Quality Evaluation</b> |                                                                                                                                                                                                                                         |               |
|---------------------------------|-----------------------------------------------------------------------------------------------------------------------------------------------------------------------------------------------------------------------------------------|---------------|
| <b>Item</b>                     | <b>Question</b>                                                                                                                                                                                                                         | <b>Coding</b> |
| 1. Question                     | Was the research question or objective in this paper clearly stated?                                                                                                                                                                    | 0-No<br>1-Yes |
| 2. Population                   | Was the study population clearly specified and defined?                                                                                                                                                                                 | 0-No<br>1-Yes |
| 3. Participation                | Was the participation rate of eligible persons at least 50%?                                                                                                                                                                            | 0-No<br>1-Yes |
| 4. Inclusion/Exclusion Criteria | Were all the subjects selected or recruited from the same or similar populations (including the same time period)? Were inclusion and exclusion criteria for being in the study prespecified and applied uniformly to all participants? | 0-No<br>1-Yes |
| 5. Sample Size                  | Was a sample size justification, power description, or variance and effect estimates provided?                                                                                                                                          | 0-No<br>1-Yes |
| 6.                              | For the analyses in this paper, were the exposure(s) of interest measured prior to the outcome(s) being measured?                                                                                                                       | 0-No<br>1-Yes |
| 7. Timeframe                    | Was the timeframe sufficient so that one could reasonably expect to see an association between exposure and outcome if it existed?                                                                                                      | 0-No<br>1-Yes |
| 8. Levels of Exposure           | For exposures that can vary in amount or level, did the study examine different levels of the exposure as related to the outcome (e.g., categories of exposure, or exposure measured as continuous variable)?                           | 0-No<br>1-Yes |
| 9. Independent Variable         | Were the exposure measures (independent variables) clearly defined, valid, reliable, and                                                                                                                                                | 0-No<br>1-Yes |

|                                      |                                                                                                                                                                                                                           |                                                       |
|--------------------------------------|---------------------------------------------------------------------------------------------------------------------------------------------------------------------------------------------------------------------------|-------------------------------------------------------|
|                                      | implemented consistently across all study participants?                                                                                                                                                                   |                                                       |
| 10. Longitudinal/Repeated ACEs       | Was the exposure(s) assessed more than once over time?                                                                                                                                                                    | 0-No<br>1-Yes                                         |
| 11. Dependent Variable               | Were the outcome measures (dependent variables) clearly defined, valid, reliable, and implemented consistently across all study participants?                                                                             | 0-No<br>1-Yes                                         |
| 12. Objectivity independent variable | Does the study use objective reports or multiple-methods to measure maternal ACEs?<br><br>Objective measure = child abuse reports<br><br>Multiple methods = self-report and corroborated reports.                         | 0-self report<br>1-objective measure/multiple methods |
| 13. Objective dependent variables    | Does the study use different reporters or multiple-methods to measure maternal health/mental health outcomes?<br><br>Objective measure = hospital report, diagnosis by physician, measurement by health care professional | 0-self report<br>1-objective measure/multiple methods |
| 14. Lost to Follow-Up                | Was loss to follow-up after baseline 20% or less?                                                                                                                                                                         | 0-No<br>1-Yes                                         |
| 15. Confounder                       | Were key potential confounding variables measured and adjusted statistically for their impact on the relationship between exposure(s) and outcome(s)?                                                                     | 0-No<br>1-Yes                                         |
| <b>Total</b>                         | A sum of all items was calculated to obtain a total quality score (0-15).                                                                                                                                                 |                                                       |



Supplementary Table S3: Quality of the study

| Sl# | First Author/Pub Date         | Question | Population | Participation | Inclusion/Exclusion Criteria | Sample Size | Exposures | Timeframe | Levels of Bias | Independent Variables | Longitudinal/Repeated ACEs | Dependent Variable | Objectivity independent variable | Objective dependent variables | Lost to Follow-up | Confounder | Overall | Quality score |
|-----|-------------------------------|----------|------------|---------------|------------------------------|-------------|-----------|-----------|----------------|-----------------------|----------------------------|--------------------|----------------------------------|-------------------------------|-------------------|------------|---------|---------------|
| 1   | Christiaens/2015              | 1        | 1          | 0             | 1                            | 1           | 1         | 1         | 1              | 1                     | 0                          | 0                  | 1                                | 0                             | 0                 | 1          | 10      | Moderate      |
| 2   | Grimstad/ 1999                | 1        | 1          | 1             | 1                            | 1           | 1         | 1         | 0              | 0                     | 0                          | 0                  | 1                                | 1                             | 0                 | 0          | 9       | Low           |
| 3   | Hardcastle et al., 2022       | 1        | 1          | 1             | 1                            | 1           | 1         | 1         | 1              | 1                     | 0                          | 1                  | 1                                | 1                             | 1                 | 1          | 14      | High          |
| 4   | Noll/ 2007                    | 1        | 1          | 1             | 0                            | 0           | 1         | 1         | 0              | 0                     | 0                          | 0                  | 1                                | 1                             | 0                 | 0          | 7       | Low           |
| 5   | Leeners/ 2014                 | 0        | 1          | 1             | 0                            | 0           | 1         | 0         | 0              | 0                     | 0                          | 0                  | 0                                | 0                             | 0                 | 1          | 10      | Moderate      |
| 6   | Selk/2016                     | 1        | 1          | 1             | 1                            | 1           | 1         | 1         | 1              | 1                     | 0                          | 1                  | 1                                | 1                             | 0                 | 1          | 13      | High          |
| 7   | Harville/2010                 | 1        | 1          | 1             | 0                            | 1           | 1         | 1         | 1              | 1                     | 1                          | 1                  | 0                                | 1                             | 0                 | 1          | 12      | Moderate      |
| 8   | Versteegen et al., 2021       | 1        | 1          | 1             | 1                            | 1           | 1         | 1         | 1              | 1                     | 0                          | 1                  | 1                                | 1                             | 1                 | 1          | 14      | High          |
| 9   | Stanhope et al., 2020         | 1        | 1          | 1             | 1                            | 1           | 1         | 1         | 1              | 1                     | 0                          | 1                  | 1                                | 1                             | 1                 | 1          | 14      | High          |
| 10  | Schoenaker et al., 2019       | 1        | 1          | 1             | 1                            | 1           | 1         | 1         | 1              | 1                     | 0                          | 1                  | 1                                | 1                             | 1                 | 1          | 14      | High          |
| 11  | Miller et al., 2017           | 1        | 1          | 1             | 1                            | 1           | 1         | 0         | 0              | 1                     | 0                          | 1                  | 0                                | 1                             | 0                 | 0          | 9       | Low           |
| 12  | Mersky et al., 2019           | 1        | 1          | 1             | 1                            | 1           | 1         | 1         | 1              | 1                     | 0                          | 1                  | 1                                | 1                             | 0                 | 1          | 13      | High          |
| 13  | Mason et al., 2016            | 1        | 1          | 1             | 1                            | 1           | 1         | 1         | 1              | 1                     | 0                          | 1                  | 1                                | 1                             | 0                 | 1          | 13      | High          |
| 14  | Cammack et al., 2018          | 1        | 1          | 1             | 1                            | 1           | 1         | 1         | 1              | 1                     | 0                          | 1                  | 1                                | 1                             | 0                 | 1          | 13      | High          |
| 15  | BALA et al., 2020             | 1        | 1          | 1             | 1                            | 1           | 1         | 1         | 0              | 1                     | 0                          | 1                  | 1                                | 1                             | 0                 | 1          | 12      | Moderate      |
| 16  | Ben Salah et al, 2019         | 1        | 1          | 1             | 1                            | 1           | 1         | 1         | 1              | 1                     | 0                          | 1                  | 1                                | 1                             | 0                 | 1          | 13      | High          |
| 17  | Bhengru, 2019                 | 1        | 1          | 1             | 1                            | 1           | 1         | 0         | 1              | 1                     | 1                          | 1                  | 1                                | 1                             | 0                 | 0          | 12      | Moderate      |
| 18  | Gillespie et al. (2017)       | 1        | 1          | 1             | 0                            | 1           | 1         | 1         | 0              | 1                     | 1                          | 1                  | 1                                | 0                             | 0                 | 0          | 10      | Moderate      |
| 19  | Leeners et al, 2014           | 1        | 1          | 1             | 1                            | 1           | 1         | 1         | 1              | 1                     | 1                          | 1                  | 1                                | 1                             | 1                 | 1          | 15      | High          |
| 20  | McDonnell and Val et al, 2014 | 1        | 1          | 1             | 1                            | 1           | 1         | 1         | 1              | 1                     | 1                          | 1                  | 1                                | 1                             | 0                 | 1          | 14      | High          |
| 21  | Shaikh et al., 2019           | 1        | 1          | 1             | 1                            | 0           | 0         | 1         | 1              | 1                     | 0                          | 1                  | 0                                | 1                             | 1                 | 1          | 11      | Moderate      |
| 22  | Smith et al., 2016            | 1        | 1          | 1             | 1                            | 0           | 0         | 1         | 1              | 1                     | 0                          | 1                  | 0                                | 0                             | 1                 | 1          | 10      | Moderate      |
| 23  | Ranchod et al, 2016           | 1        | 1          | 1             | 1                            | 0           | 0         | 1         | 0              | 1                     | 0                          | 1                  | 0                                | 0                             | 0                 | 1          | 8       | Low           |
| 24  | Appleton et al, 2019          | 1        | 1          | 1             | 1                            | 0           | 0         | 1         | 0              | 1                     | 0                          | 1                  | 0                                | 1                             | 1                 | 0          | 9       | Low           |
| 25  | Fredriksen et al, 2017        | 1        | 1          | 1             | 1                            | 0           | 0         | 1         | 1              | 1                     | 0                          | 1                  | 0                                | 0                             | 0                 | 0          | 8       | Low           |

|    |                         |   |   |   |   |   |   |   |   |   |   |   |   |   |   |   |    |          |
|----|-------------------------|---|---|---|---|---|---|---|---|---|---|---|---|---|---|---|----|----------|
| 26 | Hantsoo et al,2019      | 1 | 1 | 1 | 1 | 0 | 0 | 1 | 0 | 1 | 0 | 1 | 0 | 0 | 0 | 1 | 8  | Low      |
| 27 | Letourneau et al, 2019  | 1 | 1 | 1 | 1 | 0 | 0 | 1 | 1 | 1 | 0 | 1 | 0 | 0 | 1 | 1 | 10 | Moderate |
| 28 | Howell1,2020            | 1 | 1 | 1 | 1 | 0 | 1 | 1 | 1 | 1 | 1 | 1 | 0 | 0 | 1 | 1 | 12 | Moderate |
| 29 | Narayan et al, 2018     | 1 | 1 | 1 | 1 | 0 | 0 | 1 | 1 | 1 | 0 | 1 | 0 | 0 | 1 | 0 | 9  | Low      |
| 30 | Racine et al, 2020      | 1 | 1 | 1 | 1 | 0 | 0 | 1 | 0 | 1 | 0 | 1 | 0 | 0 | 0 | 1 | 8  | Low      |
| 31 | Young-Wolff et al, 2019 | 1 | 1 | 1 | 1 | 0 | 0 | 1 | 1 | 1 | 0 | 1 | 0 | 1 | 1 | 1 | 11 | Moderate |
| 32 | Barrios et al, 2015     | 1 | 1 | 1 | 1 | 0 | 0 | 1 | 1 | 1 | 0 | 1 | 0 | 1 | 1 | 1 | 11 | Moderate |

1  
2  
3  
4  
5  
6  
7  
8  
9  
10  
11  
12  
13  
14  
15  
16  
17  
18  
19  
20  
21  
22  
23  
24  
25  
26  
27  
28  
29  
30  
31  
32  
33  
34  
35  
36  
37  
38  
39  
40  
41  
42  
43  
44  
45  
46  
47  
48  
49  
50  
51  
52  
53  
54  
55  
56  
57  
58  
59  
60

For peer review only

## Adverse Childhood Experiences, the Risk of Pregnancy Complications and Adverse Pregnancy Outcomes: A Systematic Review and Meta-analysis

| Section/Topic             | Item # | Recommendation                                                                                                                                                                                                                                                                                                                                                                                                                                                         | Reported on page # |
|---------------------------|--------|------------------------------------------------------------------------------------------------------------------------------------------------------------------------------------------------------------------------------------------------------------------------------------------------------------------------------------------------------------------------------------------------------------------------------------------------------------------------|--------------------|
| Title and abstract        | 1      | (a) Indicate the study's design with a commonly used term in the title or the abstract                                                                                                                                                                                                                                                                                                                                                                                 | 2                  |
|                           |        | (b) Provide in the abstract an informative and balanced summary of what was done and what was found                                                                                                                                                                                                                                                                                                                                                                    | 2                  |
| <b>Introduction</b>       |        |                                                                                                                                                                                                                                                                                                                                                                                                                                                                        |                    |
| Background/rationale      | 2      | Explain the scientific background and rationale for the investigation being reported                                                                                                                                                                                                                                                                                                                                                                                   | 4                  |
| Objectives                | 3      | State specific objectives, including any pre-specified hypotheses                                                                                                                                                                                                                                                                                                                                                                                                      | 5                  |
| <b>Methods</b>            |        |                                                                                                                                                                                                                                                                                                                                                                                                                                                                        |                    |
| Study design              | 4      | Present key elements of study design early in the paper                                                                                                                                                                                                                                                                                                                                                                                                                | 5                  |
| Setting                   | 5      | Describe the setting, locations, and relevant dates, including periods of recruitment, exposure, follow-up, and data collection                                                                                                                                                                                                                                                                                                                                        | 6                  |
| Participants              | 6      | (a) <i>Cohort study</i> —Give the eligibility criteria, and the sources and methods of selection of participants. Describe methods of follow-up<br><i>Case-control study</i> —Give the eligibility criteria, and the sources and methods of case ascertainment and control selection. Give the rationale for the choice of cases and controls<br><i>Cross-sectional study</i> —Give the eligibility criteria, and the sources and methods of selection of participants | 6                  |
|                           |        | (b) <i>Cohort study</i> —For matched studies, give matching criteria and number of exposed and unexposed<br><i>Case-control study</i> —For matched studies, give matching criteria and the number of controls per case                                                                                                                                                                                                                                                 | 6                  |
| Variables                 | 7      | Clearly define all outcomes, exposures, predictors, potential confounders, and effect modifiers. Give diagnostic criteria, if applicable                                                                                                                                                                                                                                                                                                                               | 6                  |
| Data sources/ measurement | 8*     | For each variable of interest, give sources of data and details of methods of assessment (measurement). Describe comparability of assessment methods if there is more than one group                                                                                                                                                                                                                                                                                   | 6                  |
| Bias                      | 9      | Describe any efforts to address potential sources of bias                                                                                                                                                                                                                                                                                                                                                                                                              | 6                  |
| Study size                | 10     | Explain how the study size was arrived at                                                                                                                                                                                                                                                                                                                                                                                                                              | 6                  |
| Quantitative variables    | 11     | Explain how quantitative variables were handled in the analyses. If applicable, describe which groupings were chosen and why                                                                                                                                                                                                                                                                                                                                           | 6                  |
| Statistical methods       | 12     | (a) Describe all statistical methods, including those used to control for confounding                                                                                                                                                                                                                                                                                                                                                                                  | 7                  |
|                           |        | (b) Describe any methods used to examine subgroups and interactions                                                                                                                                                                                                                                                                                                                                                                                                    | 7                  |
|                           |        | (c) Explain how missing data were addressed                                                                                                                                                                                                                                                                                                                                                                                                                            | 7                  |
|                           |        | (d) <i>Cohort study</i> —If applicable, explain how loss to follow-up was addressed<br><i>Case-control study</i> —If applicable, explain how matching of cases and controls was addressed                                                                                                                                                                                                                                                                              | 7                  |

|                          |     |                                                                                                                                                                                                              |      |
|--------------------------|-----|--------------------------------------------------------------------------------------------------------------------------------------------------------------------------------------------------------------|------|
|                          |     | <i>Cross-sectional study</i> —If applicable, describe analytical methods taking account of sampling strategy                                                                                                 |      |
|                          |     | (e) Describe any sensitivity analyses                                                                                                                                                                        | 7    |
| <b>Results</b>           |     |                                                                                                                                                                                                              |      |
| Participants             | 13* | (a) Report numbers of individuals at each stage of study—eg numbers potentially eligible, examined for eligibility, confirmed eligible, included in the study, completing follow-up, and analysed            | 8-14 |
|                          |     | (b) Give reasons for non-participation at each stage                                                                                                                                                         | 8-14 |
|                          |     | (c) Consider use of a flow diagram                                                                                                                                                                           | 8-14 |
| Descriptive data         | 14* | (a) Give characteristics of study participants (eg demographic, clinical, social) and information on exposures and potential confounders                                                                     | 8-14 |
|                          |     | (b) Indicate number of participants with missing data for each variable of interest                                                                                                                          | 8-14 |
|                          |     | (c) <i>Cohort study</i> —Summarise follow-up time (eg, average and total amount)                                                                                                                             | 8-14 |
| Outcome data             | 15* | <i>Cohort study</i> —Report numbers of outcome events or summary measures over time                                                                                                                          | 8-14 |
|                          |     | <i>Case-control study</i> —Report numbers in each exposure category, or summary measures of exposure                                                                                                         | 8-14 |
|                          |     | <i>Cross-sectional study</i> —Report numbers of outcome events or summary measures                                                                                                                           | 8-14 |
| Main results             | 16  | (a) Give unadjusted estimates and, if applicable, confounder-adjusted estimates and their precision (eg, 95% confidence interval). Make clear which confounders were adjusted for and why they were included | 8-14 |
|                          |     | (b) Report category boundaries when continuous variables were categorized                                                                                                                                    | 8-14 |
|                          |     | (c) If relevant, consider translating estimates of relative risk into absolute risk for a meaningful time period                                                                                             | 8-14 |
| Other analyses           | 17  | Report other analyses done—eg analyses of subgroups and interactions, and sensitivity analyses                                                                                                               |      |
| <b>Discussion</b>        |     |                                                                                                                                                                                                              |      |
| Key results              | 18  | Summarise key results with reference to study objectives                                                                                                                                                     | 15   |
| Limitations              | 19  | Discuss limitations of the study, taking into account sources of potential bias or imprecision. Discuss both direction and magnitude of any potential bias                                                   | 15   |
| Interpretation           | 20  | Give a cautious overall interpretation of results considering objectives, limitations, multiplicity of analyses, results from similar studies, and other relevant evidence                                   | 16   |
| Generalisability         | 21  | Discuss the generalisability (external validity) of the study results                                                                                                                                        | 16   |
| <b>Other information</b> |     |                                                                                                                                                                                                              |      |
| Funding                  | 22  | Give the source of funding and the role of the funders for the present study and, if applicable, for the original study on which the present article is based                                                | 16   |

# BMJ Open

## Adverse Childhood Experiences, the Risk of Pregnancy Complications and Adverse Pregnancy Outcomes: A Systematic Review and Meta-analysis

|                                 |                                                                                                                                                                                                                                                                                                                                                                                                                                                                                                                                                                                                                                                                                                                                                                        |
|---------------------------------|------------------------------------------------------------------------------------------------------------------------------------------------------------------------------------------------------------------------------------------------------------------------------------------------------------------------------------------------------------------------------------------------------------------------------------------------------------------------------------------------------------------------------------------------------------------------------------------------------------------------------------------------------------------------------------------------------------------------------------------------------------------------|
| Journal:                        | <i>BMJ Open</i>                                                                                                                                                                                                                                                                                                                                                                                                                                                                                                                                                                                                                                                                                                                                                        |
| Manuscript ID                   | bmjopen-2022-063826.R2                                                                                                                                                                                                                                                                                                                                                                                                                                                                                                                                                                                                                                                                                                                                                 |
| Article Type:                   | Original research                                                                                                                                                                                                                                                                                                                                                                                                                                                                                                                                                                                                                                                                                                                                                      |
| Date Submitted by the Author:   | 24-Apr-2023                                                                                                                                                                                                                                                                                                                                                                                                                                                                                                                                                                                                                                                                                                                                                            |
| Complete List of Authors:       | Mamun, Abdullah; The University of Queensland<br>Biswas, Tuhin; University of Queensland,<br>Scott, James; University of Queensland<br>Sly, P.D.; University of Queensland, Queensland Childrens Medical<br>Research Instit<br>McIntyre, David; Mater Research Institute The University of Queensland<br>Thorpe , Karen ; University of Queensland<br>Boyle , Frances; University of Queensland<br>Dekker, N; University of Queensland, Centre for Clinical Research<br>Doi, Suhail; Qatar University, Population Medicine<br>Mitchell, Murray; QUT, Faculty of Health, School of Biomedical Sciences<br>McNeil, Keith; Queensland Health<br>Kothari, Alka ; University of Queensland<br>Hardiman, Leah; Queensland Health<br>Callaway, Leonie Kaye; Queensland Health |
| <b>Primary Subject Heading</b>: | Global health                                                                                                                                                                                                                                                                                                                                                                                                                                                                                                                                                                                                                                                                                                                                                          |
| Secondary Subject Heading:      | Public health, Mental health, Health policy                                                                                                                                                                                                                                                                                                                                                                                                                                                                                                                                                                                                                                                                                                                            |
| Keywords:                       | Epidemiology < TROPICAL MEDICINE, EPIDEMIOLOGY, Adverse events < THERAPEUTICS, Diabetes in pregnancy < DIABETES & ENDOCRINOLOGY, Prenatal diagnosis < OBSTETRICS                                                                                                                                                                                                                                                                                                                                                                                                                                                                                                                                                                                                       |
|                                 |                                                                                                                                                                                                                                                                                                                                                                                                                                                                                                                                                                                                                                                                                                                                                                        |

SCHOLARONE™  
Manuscripts

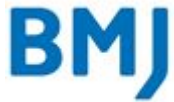

I, the Submitting Author has the right to grant and does grant on behalf of all authors of the Work (as defined in the below author licence), an exclusive licence and/or a non-exclusive licence for contributions from authors who are: i) UK Crown employees; ii) where BMJ has agreed a CC-BY licence shall apply, and/or iii) in accordance with the terms applicable for US Federal Government officers or employees acting as part of their official duties; on a worldwide, perpetual, irrevocable, royalty-free basis to BMJ Publishing Group Ltd ("BMJ") its licensees and where the relevant Journal is co-owned by BMJ to the co-owners of the Journal, to publish the Work in this journal and any other BMJ products and to exploit all rights, as set out in our [licence](#).

The Submitting Author accepts and understands that any supply made under these terms is made by BMJ to the Submitting Author unless you are acting as an employee on behalf of your employer or a postgraduate student of an affiliated institution which is paying any applicable article publishing charge ("APC") for Open Access articles. Where the Submitting Author wishes to make the Work available on an Open Access basis (and intends to pay the relevant APC), the terms of reuse of such Open Access shall be governed by a Creative Commons licence – details of these licences and which [Creative Commons](#) licence will apply to this Work are set out in our licence referred to above.

Other than as permitted in any relevant BMJ Author's Self Archiving Policies, I confirm this Work has not been accepted for publication elsewhere, is not being considered for publication elsewhere and does not duplicate material already published. I confirm all authors consent to publication of this Work and authorise the granting of this licence.

1

2  
3  
4  
5  
6 **Adverse Childhood Experiences, the Risk of Pregnancy Complications and Adverse**  
7  
8 **Pregnancy Outcomes: A Systematic Review and Meta-analysis**  
9

10  
11 **Author's names:** Abdullah Al Mamun, PhD<sup>1,2</sup>, Tuhin Biswas, PhD<sup>1,2</sup>; James G. Scott,  
12  
13 PhD<sup>3,4,5</sup>; Peter D Sly, MD, DSc<sup>6</sup>; David McIntyre, PhD<sup>7</sup>; Karen Thorpe, PhD<sup>1,2</sup>; Frances M.  
14  
15 Boyle, PhD<sup>1</sup>; Marloes Dekker Nitert PhD<sup>8</sup>, Suhail A. R. Doi, PhD<sup>9,10</sup>; Murray Mitchell, PhD<sup>11</sup>;  
16  
17 Keith McNeil, PhD<sup>12</sup>; Alka Kothari, MD FRANZCOG<sup>13,14</sup>, Leah Hardiman MSC<sup>15</sup>, Leonie  
18  
19 Callaway, PhD<sup>15</sup>  
20  
21  
22

9

23  
24  
25  
26 **Author affiliations:**  
27

- 28  
29 1. UQ Poche Centre for Indigenous Health, The University of Queensland, Queensland,  
30  
31 Australia.  
32  
33 2. ARC Centre of Excellence for Children and Families over the Life Course, The  
34  
35 University of Queensland, QLD, Australia  
36  
37  
38 3. Mental Health Research Program, QIMR Berghofer Medical Research Institute,  
39  
40 Herston, QLD, Australia  
41  
42  
43 4. Metro North Mental Health, Royal Brisbane and Women's Hospital, Herston, QLD,  
44  
45 Australia  
46  
47  
48 5. Queensland Centre for Mental Health Research, The Park Centre for Mental Health,  
49  
50 Wacol, QLD, Australia  
51  
52  
53 6. Children's Health and Environment Program, Child Health Research Centre, The  
54  
55 University of Queensland, QLD, Australia  
56  
57  
58  
59  
60



- 1  
2  
3 23 7. Mater Research, Faculty of Medicine, University of Queensland, Mater Health, QLD,  
4  
5 24 Australia.
- 6  
7 25 8. School of Chemistry and Molecular Biosciences, The University of Queensland, QLD,  
8  
9 26 Australia
- 10  
11 27 9. Research School of Population Health, Australian National University, Canberra,  
12  
13 28 Australian Capital Territory
- 14  
15 29 10. Department of Population Medicine, College of Medicine, Qatar University, Doha
- 16  
17 30 11. Faculty of Health, School of Biomedical Sciences, The Queensland University of  
18  
19 31 Technology, QLD, Australia
- 20  
21 32 12. Prevention Division, Queensland Health, QLD, Australia
- 22  
23 33 13. Department of Obstetrics & Gynaecology, Redcliffe Hospital, Anzac Avenue,  
24  
25 34 Redcliffe, QLD, Australia
- 26  
27 35 14. Faculty of Medicine, The University of Queensland, QLD, Australia
- 28  
29 36 15. Women's and Children's Stream - Metro North Hospital and Health Services, QLD,  
30  
31 37 Australia
- 32  
33 38 16. Institute for Social Science Research, The University of Queensland, QLD, Australia
- 34  
35 39 17. Asian University for Women (AUW), Chittagong, Bangladesh
- 36  
37 40 18.
- 38  
39  
40  
41  
42  
43  
44  
45  
46

47 Corresponding author:

48  
49  
50 43 Abdullah Al Mamun

51  
52  
53 44 UQ Poche Centre for Indigenous Health, The University of Queensland, Queensland,  
54  
55 45 Australia.

56  
57  
58 46 74 High Street, Queensland 4068, Australia.  
59  
60

1  
2  
3 47 Email: mamun@sph.uq.edu.au  
4  
5

6 48 Telephone: +61 7 336 53163  
7  
8

9 49  
10

11 50  
12

13  
14 51 **Abstract**

15  
16  
17 52 **Background:**

18  
19  
20 53 Adverse childhood experiences (ACEs) have a profound negative impact on health. However,  
21  
22 54 the strength of the association between ACEs and pregnancy complications and adverse  
23  
24 55 pregnancy outcomes is not well quantified or understood.  
25  
26

27 56 **Objectives:**

28  
29  
30 57 Conduct a systematic review and meta-analysis of the association between ACEs and risk of  
31  
32 58 pregnancy complications and adverse pregnancy outcomes.  
33  
34

35 59 **Search Strategy:**

36  
37  
38 60 A comprehensive search was conducted using PubMed, EMBASE, CINAHL, PsycINFO,  
39  
40 61 ClinicalTrials.gov and Google scholar up to July 2022.  
41  
42

43 62 **Data Collection and Analysis:**

44  
45  
46 63 Two reviewers independently conducted the screening and quality appraisal using a validated  
47  
48 64 tool. Meta-analysis using the quality-effects model on the reported odds ratio (OR) was  
49  
50 65 conducted. Heterogeneity and inconsistency were examined using the  $I^2$  statistics.  
51  
52

53 66 **Results:**

54  
55  
56 67 Thirty-two studies from 1,508met a priori inclusion criteria for systematic review, with twenty-  
57  
58 68 one included in the meta-analysis. Pooled analyses showed that exposure to ACEs increased  
59  
60

1  
2  
3 69 the risk of pregnancy complications (odds ratio, OR=1.37, 95% CI: 1.20-1.50) and adverse  
4  
5 70 pregnancy outcomes (OR=1.31, 95% CI: 1.16-1.48). In sub-group analysis, maternal ACEs  
6  
7 71 were associated with gestational diabetes mellitus (OR=1.39, 95% CI: 1.11-1.74), antenatal  
8  
9 72 depression (OR=1.59, 95% CI: 1.15-2.20), low offspring birth weight (OR=1.27, 95% CI:  
10  
11 1.02-1.59), and preterm delivery (OR=1.41, 95% CI: 1.16-1.71).  
12  
13  
14

15 74 **Conclusion:**

16  
17  
18 75 The results suggest that exposure to ACEs increase the risk of pregnancy complications and  
19  
20 76 adverse pregnancy outcomes. Preventive strategies, screening and trauma-informed care need  
21  
22 77 to be examined to improve maternal and child health.  
23  
24

25 78 **Funding statement:** This research was partially supported by the Australian Research  
26  
27 79 Council Centre of Excellence for Children and Families over the Life Course  
28  
29 80 (CE200100025).  
30  
31  
32

33 81 **Keywords:** Adverse childhood experiences, pregnancy complications, adverse pregnancy  
34  
35 82 outcomes  
36  
37

38 83 **Tweetable abstract:**

39  
40 84 Adverse childhood experiences linked to pregnancy complications and adverse pregnancy  
41  
42 85 outcomes.  
43  
44  
45

46 86  
47  
48  
49  
50  
51  
52  
53  
54  
55  
56  
57  
58  
59  
60

## 87 **Strengths and limitations of this study**

- 88 • Maternal ACEs were associated with an increased risk of pregnancy complications,  
89 including GDM, GWG, HDP and depression/anxiety during pregnancy.
- 90 • ACE exposure showed a significant association with any adverse pregnancy outcome.
- 91 • Most of the included studies are from high-income western countries. Due to the lack  
92 of data, we could not conduct the ACEs item-specific analysis.
- 93 • The dose-response relationship in all studies could not be assessed as different studies  
94 use different screening tools and cut-off values.

## 96 **Introduction**

97 Adverse Childhood Experiences (ACEs)[1]are psychosocial stressors and traumas experienced  
98 by an individual before 18 years of age[2, 3]The pioneering study by Felitti and colleagues  
99 (1998) demonstrated that exposure to ACEs is common, ACEs co-occur and that exposure to  
100 multiple ACEs are associated with an increased risk of health risk behaviours and  
101 illnesses.[4]Subsequently, a growing body of research has continued to provide consistent  
102 evidence that ACEs are a major public health issue due to their high prevalence and harmful  
103 effects that ACEs have on human health throughout life.[5, 6]

104  
105 Early life experiences are recognized as essential determinants for health outcomes later in life  
106 especially in pregnant women and their children.[7]Adverse health outcomes in pregnancy can  
107 then result in intergenerational transmission of adverse health outcomes. Perhaps this occurs  
108 because women who have experienced ACEs may be a vulnerable group for development of  
109 health risk behaviours, including smoking, drug and alcohol use and sedentary lifestyle, along  
110 with consequences of trauma such as poor sleep.[5] These behaviours increase the risk of  
111 pregnancy complications including gestational diabetes mellitus (GDM), hypertensive disorder  
112 of pregnancy (HDP),excess gestational weight gain (GWG), depression/anxiety during

1  
2  
3 113 pregnancy[8] and adverse pregnancy outcomes including low birth weight and preterm  
4  
5 114 birth.[9-11]Systematic reviews have reported women who had experienced child maltreatment  
6  
7  
8 115 are more likely to have pregnancy complications and that physical abuse and household  
9  
10 116 substance abuse were associated with greater risk of GDM[12, 13] resulting in  
11  
12 117 intergenerational transmission of adverse health outcomes. Overall, those reporting exposure  
13  
14 118 to multiple ACEs (mostly 4 or more) have an increased risk of physical, mental, and substance  
15  
16 119 use disorders.[14]

17  
18  
19  
20 120

21  
22 121 There is little information about ACEs and the associated risk of pregnancy complications and  
23  
24 122 adverse birth outcomes. A longitudinal study in Australia reported that women exposed to  
25  
26 123 three or more ACEs had an elevated GDM risk.[15] In contrast, a longitudinal study from the  
27  
28 124 USA reported no significant association between ACEs (for each score change and reported 4  
29  
30 125 or more ACEs) and GDM.[16]A systematic review suggests that total ACEs (score in  
31  
32 126 continuous scale) are associated with preterm birth, although this finding needs to be confirmed  
33  
34 127 in other studies to explore the associations between ACEs and preterm birth using appropriate  
35  
36 128 and valid instruments.[17] Another systematic review and meta-analysis reported that maternal  
37  
38 129 history of abuse before pregnancy was significantly associated with preterm delivery and low  
39  
40 130 birth weight.[18] No systematic review and meta-analysis has investigated the association of  
41  
42 131 ACEs and the risk of pregnancy complications including GDM, HDP, GWG,  
43  
44 132 depression/anxiety during pregnancy and adverse pregnancy outcomes. This study aims to  
45  
46 133 systematically review and meta-analyse existing studies to establish the extent of association  
47  
48 134 between ACEs and pregnancy complications and adverse birth outcomes. Understanding these  
49  
50 135 associations will inform maternal clinical care and support for offspring of those women  
51  
52 136 exposed to ACEs.  
53  
54  
55  
56  
57  
58  
59  
60 137

## 138 **Methods**

139 In this systematic review and meta-analysis, we followed the Preferred Reporting Items for  
140 Systematic Reviews and Meta-Analyses Protocols (PRISMA-P) guidelines [19] and the Meta-  
141 Analysis of Observational Studies in Epidemiology protocol [20] to ensure all necessary steps  
142 were followed. In accordance with the guidelines, the systematic review and meta-analysis  
143 protocol was registered in PROSPERO (CRD42021278030).

## 145 **Literature search strategy**

146 Our search included studies published to July 2022 using PubMed, EMBASE, CINAHL,  
147 PsycINFO, ClinicalTrials.gov and Google scholar. The search strategy employed with PubMed  
148 is: (((((((((((("adverse childhood experiences") OR ("childhood adversities")) OR  
149 ("childhood abuse")) OR ("childhood maltreatment")) OR ("child trauma")) OR ("adverse  
150 childhood events")) OR ("childhood sexual abuse")) OR ("childhood physical abuse")) OR  
151 ("childhood mental abuse")) OR ("childhood trauma")) OR ("childhood violence")) OR  
152 ("childhood hardship")) OR ("childhood suffering")) OR ("childhood Stress")) AND  
153 (((((((((((("pregnancy complications") OR ("Depression")) OR ("Anxiety")) OR ("Prenatal  
154 depression")) OR ("Depressive symptoms")) OR ("Antenatal depression")) OR ("Mental health  
155 problem")) OR ("gestational diabetes mellitus")) OR ("GDM")) OR ("hypertensive disorder of  
156 pregnancy")) OR ("HDP")) OR ("preeclampsia")) OR ("maternal body weight")) OR ("excess  
157 weight gain")) OR ("abnormal fetal growth")) OR ("Intrauterine growth restriction")) OR  
158 ("Low birth weight")) OR (LBW))OR (IUGR)) OR (Stillbirth)) OR ("small of gestational  
159 age")) OR ("preterm birth")). This search details are presented in a supplementary table (Table  
160 S1).

161

## 162 **Inclusion criteria**

163 Studies were included if the full-text was published in English, population was pregnant  
164 women, reported any ACEs including childhood maltreatment ( childhood physical, emotional  
165 and sexual abuse, childhood physical and emotional neglect and exposure to parental intimate  
166 partner violence), childhood trauma or childhood hardship/suffering and if studies reported any  
167 pregnancy-related complications according to National Institute of Health (NIH)[21] (GDM,  
168 HDP, GWG, depression/anxiety during pregnancy) and adverse birth outcomes such as low  
169 birth weight, intra-uterine growth restriction (IUGR), preterm birth, stillbirth. Studies were  
170 excluded if: (1) published in languages other than English; (2) included general population (not  
171 pregnant); (3) reported reviews, qualitative studies, editorials, abstracts, case reports and letters  
172 to the editor (4) explored violence during pregnancy.

173

## 174 **Data extraction**

175 Two independent reviewers (TB and AAM) carried out the data extraction. If AAM and TB  
176 did not reach agreement, the small group (AAM, TB, LC and JS) discussed discrepancies to  
177 reach a consensus. A similar approach was used for title/abstract and full text reviews. We  
178 excluded study protocol, systematic review, and qualitative study during the title screening  
179 phase. During the abstract screening phase, we excluded articles that didn't present any  
180 association between ACEs and pregnancy complications and outcomes (Figure-1). Relevant  
181 data from each of the selected studies was extracted including first author; study title; country  
182 of study; sample size; study design; types of ACEs; measurement scale; and outcomes (both  
183 risk of pregnancy complications and adverse pregnancy outcomes) and recorded on an Excel  
184 spreadsheet.

185

1  
2  
3 186 **Quality assessment**  
4  
5

6 187 Fifteen-point scale quality assessment tools were used to assess the quality and risk of bias of  
7  
8 188 the studies. We adapted a quality assessment tool from NIH “Quality Assessment Tool for  
9  
10 189 Observational Cohort and Cross-sectional studies”.<sup>[22]</sup> This tool allowed assessment of the  
11  
12  
13 190 question, population, participation, inclusion/exclusion criteria, sample size, exposures,  
14  
15 191 timeframe, levels of exposure, independent variables, longitudinal/repeated ACEs, dependent  
16  
17 192 variable, objectively measured independent variables, objectively measured dependent  
18  
19  
20 193 variables, lost to follow-up and confounders(**Supplementary** Table S2).Overall quality score  
21  
22 194 was considered as a continuous variable for bias adjustment in the pooled estimates. However,  
23  
24 195 we have also categorised the overall quality score into three groups: 13-15 as high;10-12 as  
25  
26 196 moderate and <10 as low.

27  
28  
29 197 The results of the quality assessment are presented in **Supplementary** Table S3.  
30  
31  
32 198  
33  
34  
35  
36  
37  
38  
39  
40  
41  
42  
43  
44  
45  
46  
47  
48  
49  
50  
51  
52  
53  
54  
55  
56  
57  
58  
59  
60



## 200 **Data Analysis**

201 Meta-analysis conducted in accordance with the meta-analysis of observational studies in  
202 epidemiology (MOOSE) guidelines. Analyses focused on the overall association between  
203 ACEs and risk of pregnancy complications and adverse birth outcomes. Subgroup data  
204 synthesis was performed only when three or more studies were available with the estimates for  
205 a similar type of ACE exposures. ACE scores were considered on the continuous scale (for  
206 each unit change) and three categories: i) none versus one ACEs; ii) two to three ACEs (low  
207 ACEs); and (iii) four or more ACEs (high ACEs). Although most of the studies reported the  
208 odds ratio (OR) as the measurement of association between exposures and outcomes, two  
209 studies reported relative risk (RR) and one hazard ratio (HR). We converted all measures of  
210 associations into ORs using conversion methods reported elsewhere.[23] In the meta-analysis,  
211 we used the quality effects model (QE)[24] for bias adjustment. The advantage of the QE model  
212 is that the between-study variability is adjusted based on the relative quality rank of the studies  
213 instead of on random variables assigned by the random effect (RE) model. The heterogeneity  
214 of the studies was reported by the I-squared value (I<sup>2</sup>) that measures the proportion of total  
215 variance between studies beyond random error.[24] We checked for publication bias through  
216 visualization by funnel plot and Doi plot.[25] All the analyses were conducted using the  
217 MetaXL software version 5.3.[26]

218 **Patient and Public Involvement:** None.

219

1  
2  
3 220 **Results**  
4  
5

6 221 The literature search resulted in 1,508 records, which were screened for duplication (n=398),  
7  
8 222 review of titles (n=1,086) and further abstract evaluation (n=485). Finally, 32 studies met our  
9  
10 223 inclusion criteria for systematic review, and 21 were included in meta-analysis (**Figure 1**). 75%  
11  
12 224 of the studies were cohort studies and the remainder were either cross sectional or case-control  
13  
14 225 studies. The majority of the studies were conducted in the USA (n = 19), with fewer studies  
15  
16 226 from Canada (n=3), Europe (n=6) and other regions (n=5). The study sample sizes varied from  
17  
18 227 48 to 11,556. The publication year ranged from 1994 to 2022. Thirteen studies used the 10-  
19  
20 228 item ACEs questionnaire[8, 16, 27-37], three used World Health Organization(WHO) ACE-  
21  
22 229 IQ questionnaires[38-40] with one study used 8-items [41] and two studies used 19-items  
23  
24 230 questionnaire[42, 43] and fourteen studies used other measures[35, 44-55] (**Table-1**).  
25  
26  
27  
28  
29  
30  
31  
32  
33  
34  
35  
36  
37  
38  
39  
40  
41  
42  
43  
44  
45  
46  
47  
48  
49  
50  
51  
52  
53  
54  
55  
56  
57  
58  
59  
60

232 **Table-1: Characteristics of studies included in the systematic review and meta-analysis**

| SI# | First Author/Pub Date   | Country     | Study design      | Sample size | Measurement scale                                                                                                                                                                                                                                                                                                                                                                                               |
|-----|-------------------------|-------------|-------------------|-------------|-----------------------------------------------------------------------------------------------------------------------------------------------------------------------------------------------------------------------------------------------------------------------------------------------------------------------------------------------------------------------------------------------------------------|
| 1   | Christiaens/2015        | Canada      | Case-control      | 622         | 10-item self-report tool by Felliti et al                                                                                                                                                                                                                                                                                                                                                                       |
| 2   | Grimstad/ 1999          | Norway      | Case-control      | 174         | Were asked about the character of the experience(s): Genital Touch; Forced to touch the other person’s genitals; Attempted Coitus; 4. Penile Vaginal Coitus                                                                                                                                                                                                                                                     |
| 3   | Noll/ 2007              | USA         | Cohort            | 186         | Childhood sexual abuse                                                                                                                                                                                                                                                                                                                                                                                          |
| 4   | Leeners/ 2014           | Switzerland | Cohort            | 255         | Childhood sexual abuse experiences were additionally explored using questions modified by Wyatt                                                                                                                                                                                                                                                                                                                 |
| 5   | Selk/2016               | USA         | Case-control      | 51434       | The measure of physical abuse included items from the Revised Conflict Tactics Scale (CTS); The sexual abuse measure was derived from the survey by Finkelhor et al                                                                                                                                                                                                                                             |
| 6   | Harville/2010           | UK          | Cohort            | 4865        | The phrase “childhood hardship” is used herein to refer to a number of adverse situations in childhood: <ul style="list-style-type: none"> <li>• Financial/structural hardship</li> <li>• No interest in education</li> <li>• Family dysfunction</li> <li>• Lack of supportive caregiving</li> <li>• Violence/mental health issues</li> <li>• Issues of family structure</li> <li>• No. of hardships</li> </ul> |
| 7   | Appleton et al, 2019    | USA         | Cohort study      | 126         | 10-item self-report tool by Felliti et al                                                                                                                                                                                                                                                                                                                                                                       |
| 8   | Versteegen et al., 2021 | USA         | Cohort            | 30          | 10-item self-report tool by Felliti et al                                                                                                                                                                                                                                                                                                                                                                       |
| 9   | Stanhope et al., 2020   | USA         | Cohort            | 2319        | 10-item self-report tool by Felliti et al                                                                                                                                                                                                                                                                                                                                                                       |
| 10  | Schoenaker et al., 2019 | Australia   | Cohort            | 11,556      | 10-item self-report tool by Felliti et al                                                                                                                                                                                                                                                                                                                                                                       |
| 11  | Miller et al., 2017     | USA         | Prospective study | 744         | asked women a series of questions about their family’s conditions during childhood                                                                                                                                                                                                                                                                                                                              |
| 12  | Mersky et al., 2019     | USA         | Longitudinal      | 1848        | 19-item assessment that has demonstrated good internal consistency                                                                                                                                                                                                                                                                                                                                              |
| 13  | Mason et al., 2016      | USA         | Cohort            | 45,550      | Physical abuse and Sexual abuse                                                                                                                                                                                                                                                                                                                                                                                 |

|    |                         |              |                                  |       |                                                                                                                                                                               |
|----|-------------------------|--------------|----------------------------------|-------|-------------------------------------------------------------------------------------------------------------------------------------------------------------------------------|
| 14 | Cammack et al., 2018    | USA          | Cohort                           | 230   | Childhood Trauma Questionnaire Short-Form (CTQ)                                                                                                                               |
| 15 | BALA et al., 2020       | Rhode Island | Population-based survey          | 3350  | 7-item questionnaire                                                                                                                                                          |
| 16 | Ben Salah et al, 2019   | Tunesia      | Prospective follow-up study      | 593   | ACE-International Questionnaire (ACE-IQ)                                                                                                                                      |
| 17 | Bhengui, 2019           | South Africa | cross-sectional                  | 223   | WHO-ACE IQ                                                                                                                                                                    |
| 18 | Gillespie et al. (2017) | USA          | Prospective observational design | 89    | The Stress and Adversity Inventory (STRAIN)                                                                                                                                   |
| 19 | Leeners et al, 2014     | Switzerland  | cohort                           | 225   | using questions modified from a questionnaire developed by Wyatt                                                                                                              |
| 20 | McDonnell et al, 2014   | USA          | Cohort                           | 398   | 10-item self-report tool by Felitti et al                                                                                                                                     |
| 21 | Shaikh et al., 2019     | Pakistan     | Cohort                           | 300   | World Health Organization 31-item ACEs –                                                                                                                                      |
| 22 | Smith et al., 2016      | USA          | Cohort                           | 2303  | The main modification of the instrument was to collapse the sexual events before the age of 18 questions into 1 question asking about childhood sexual abuse prior to age 18. |
| 23 | Ranchod et al, 2016     | USA          | Longitudinal study               | 2,873 | 4-Item questionnaire                                                                                                                                                          |
| 24 | Fredriksen et al, 2017  | Norway       | Cohort                           | 762   | 10-item self-report tool by Felitti et al                                                                                                                                     |
| 25 | Hantsoo et al, 2019     | USA          | Observational study              | 48    | 10-item self-report tool by Felitti et al                                                                                                                                     |
| 26 | Howell, 2019            | USA          | Observational study              | 101   | 10-item self-report tool by Felitti et al                                                                                                                                     |
| 27 | Letourneau et al, 2019  | Canada       | Cohort                           | 907   | 10-item self-report tool by Felitti et al                                                                                                                                     |
| 28 | Narayan et al, 2018     | USA          | Cohort                           | 101   | 10-item self-report tool by Felitti et al                                                                                                                                     |
| 29 | Racine et al, 2020      | Canada       | Cohort                           | 1994  | 10-item self-report tool by Felitti et al                                                                                                                                     |
| 30 | Young-Wolff et al, 2019 | USA          | Cohort                           | 355   | 10-item self-report tool by Felitti et al                                                                                                                                     |
| 31 | Barrios et al, 2015     | USA          | Cohort                           | 1,521 | Eight questions from CDC                                                                                                                                                      |
| 32 | Hardcastle et al., 2022 | UK           | Cross sectional                  | 865   | 10-item self-report tool by Felitti et al                                                                                                                                     |

1  
2  
3 234 In total, 32 studies were included for quality assessment. Eleven studies (34.38%) were  
4  
5 235 assessed as high quality, 12 studies (37.50%) were assessed as moderate quality, and 9 studies  
6  
7 236 (28.13%) were assessed as poor quality (Table S3). ACEs and risk of pregnancy complications  
8  
9  
10 237 ACEs and GDM: Six studies [8, 16, 35, 36, 51, 56] described an association between ACEs and  
11  
12 238 GDM and only one study reported (Table-2.1). there was no association between ACEs and  
13  
14 239 GDM [42]. A large epidemiological study in Australia [56] reported that, in pregnant women,  
15  
16 240 exposure to any three ACEs (adjusted relative risk, aRR=1.73, 95% CI:1.0, 3.0) or four or  
17  
18 241 more ACEs (aRR=1.70, 95% CI:1.00, 2.90) was associated with elevated GDM risk after  
19  
20 242 adjusting preconception BMI, unhealthy diet, parity, and maternal age. Another study in the  
21  
22 243 USA by Mason et al., 2016 [35] reported that both moderate (adjusted odds ratio, aOR=1.08,  
23  
24 244 95% CI:0.96, 1.22) and severe (aOR=1.42, 95% CI:1.21, 1.66) childhood physical abuse was  
25  
26 245 associated with an increased risk of GDM. This study also reported that forced sexual activity  
27  
28 246 during childhood was associated with an increased risk of GDM (aOR=1.30, 95% CI:1.14,  
29  
30 247 1.49).  
31  
32  
33  
34  
35  
36 248 ACEs, GWG and HDP: Only one study by Ranchod et al., 2016 [54] examined the association  
37  
38 249 between ACEs and GWG. They found that exposure to physical abuse and household alcohol  
39  
40 250 abuse were independently associated with a 20% increase in the risk of excessive GWG. A  
41  
42 251 study by Stanhope et al., 2020 [8] found that for each ACEs score, there was a slight increase  
43  
44 252 in the HDP risk (aOR=1.03, 95% CI:0.71, 1.49), although it was not statistically significant.  
45  
46 253 However, they found that physical abuse (aOR= 1.22, 95% CI: 1.10-1.42) and household  
47  
48 254 alcohol abuse (aOR= 1.21, 95% CI: 1.11-1.32) were associated with a significant increase in  
49  
50 255 the risk of excessive GWG (Table-2.1).  
51  
52  
53  
54  
55  
56 256  
57  
58  
59  
60

257 **Table-2.1: Summary of published measures of effect.**

|    |                                |            |                          |                                                                                                     |
|----|--------------------------------|------------|--------------------------|-----------------------------------------------------------------------------------------------------|
| 1  | Appleton et al, 2019           | Depression | ACE's score (continuous) | Pearson's correlations coefficients (0.37)                                                          |
| 2  | Versteegen et al., 2021        | GDM        | ACEs total               | 1.05 (0.98, 1.14)                                                                                   |
| 3  |                                |            | ACEs binary              | 2.85 (1.15-7.06)                                                                                    |
| 4  | Stanhope et al., 2020          | GDM        | ACEs 4+                  | 1.03 (0.71, 1.49)                                                                                   |
| 5  |                                |            | Continuous ACE score     | 0.96 (0.88, 1.04)                                                                                   |
| 6  |                                | HDP        | ACEs 4+                  | 1.03 (0.71, 1.49)                                                                                   |
| 7  |                                |            | Continuous ACE score:    | 1.03 (0.71, 1.49)                                                                                   |
| 8  | Schoenaker et al., 2019        | GDM        | Three ACEs               | 1.73, (1.02, 3.01)                                                                                  |
| 9  |                                |            | Four or more ACEs        | 1.76, (1.04, 2.99)                                                                                  |
| 10 | Mason et al., 2016             | GDM        | Mild physical abuse      | 1.08 (0.96, 1.22)                                                                                   |
| 11 |                                |            | Moderate physical abuse  | 11.16 (1.04, 1.29)                                                                                  |
| 12 |                                |            | Severe physical abuse    | 1.42 (1.21, 1.66).                                                                                  |
| 13 |                                |            | Forced sexual activity   | 1.30 (1.14, 1.49)                                                                                   |
| 14 |                                |            | Combine                  | 1.42, (1.21, 1.66)                                                                                  |
| 15 | BALA et al., 2020              | GDM        | 3 or more ACEs           | 1.24, (0.81–1.90)                                                                                   |
| 16 |                                |            | 1–2 ACEs                 | 1.18, (0.90– 1.55)                                                                                  |
| 17 | McDonnell et al, 2014          | GDM        |                          | GDM not correlated with ACE indicators                                                              |
| 18 | Ranchod et al, 2016            | GWG        | Physical abuse           | 1.2, (1.1-1.4)                                                                                      |
| 19 |                                |            | Household alcohol abuse  | 1.2, (1.1-1.3)                                                                                      |
| 20 |                                |            | Household mental illness | 1.1, (0.9-1.2).                                                                                     |
| 21 | Fredriksen et al., 2017        | Depression | ACEs continuous          | 1.3, (0.92-1.82)                                                                                    |
| 22 | Hantsoo et al.,2019            | Depression | < 2 ACES                 | EPDS (Median [IQR]): 5 [3, 6]                                                                       |
| 23 |                                |            | 2 or more ACES           | EPDS (Median [IQR]): 3 [1.5, 6.0]                                                                   |
| 24 | Howell et al., 2020            | Depression | ACEs continuous          | Adverse childhood experiences had a direct effect on depression, B=1.11, standard error=.44, p=.01, |
| 25 | Letourneau et al, 2019         | Depression | ACEs continuous          | Maternal ACEs were associated with symptoms of anxiety and depression during pregnancy              |
| 26 | Narayan et al et al., 2018     | Depression | ACEs continuous          | Maternal ACEs were associated with depression during pregnancy ( $\beta = 0.32$ , $p < 0.01$ ).     |
| 27 | Racine et al et al., 2020      | Depression | ACEs continuous          | 1.26, (1.12-1.43)                                                                                   |
| 28 | Young-Wolff et al et al., 2019 | Depression | 3+ ACEs                  | 3.08, (1.12-7.39)                                                                                   |
| 29 |                                |            | 1–2 ACEs                 | 2.42 (1.09–5.41)                                                                                    |
| 30 | Barrios et al., 2015           | Depression |                          | Depression: OR: 2.07; 95% CI: 1.58-2.71                                                             |

1  
2  
3 259 *ACEs and depression/anxiety*: Nine studies[27-33, 37, 41] examined the association between  
4  
5 260 ACEs and depression/anxiety with almost all studies reporting a significant positive association  
6  
7 261 during pregnancy (**Table-2.1**). For example, a large cohort study in Canada by Racine et al,  
8  
9 262 2020[32] reported that ACEs were associated with depressive symptoms in pregnancy (aOR  
10  
11 =1.26, 95% CI :1.12–1.43). Another study by Letourneau et al, 2019[30] reported that for each  
12  
13 263 maternal ACE, there was an increased risk of symptoms of anxiety and depression during  
14  
15 264 pregnancy. An observational study in the USA by Hantsoo et al[28, 29] reported that ACEs  
16  
17 265 directly affected depression (B=1.1, standard error=.44, p=.01).  
18  
19 266  
20  
21  
22  
23  
24

25 268 *Meta-analytic results for maternal ACEs and risk of pregnancy complications:*

26  
27  
28 269 A total of 11 studies (72,889 participants) were available for the quality-effect meta-analysis,  
29  
30 270 which produced an association between maternal any ACEs and risk of any adverse pregnancy  
31  
32 271 complications (OR=1.37, 95% CI: 1.20-1.57)(**Figure-2**). In risk factor-specific sub-analysis,  
33  
34 272 five studies (7116 participants)were available for meta-analysis, which produced a moderate  
35  
36 273 association between maternal ACEs and risk of GDM (OR=1.39, 95% CI: 1.11-1.74). For  
37  
38 274 depression/anxiety during pregnancy, four studies (6116 participants) were available for this  
39  
40 275 meta-analysis, which produced an association between maternal ACEs and risk of  
41  
42 276 depression/anxiety during pregnancy (OR=1.5, 95% CI: 1.15-2.2).Both low (OR=1.30, 95%  
43  
44 277 CI: 1.10-1.50) and high (OR=1.41, 95% CI: 1.02-1.90) number of ACEswere associated with  
45  
46 278 and pregnancy complications (**Supplementary Figure S1.1 and 1.2**).  
47  
48  
49  
50

51 279

52  
53  
54 280 **ACEs and adverse pregnancy outcomes**

55  
56  
57 281  
58  
59  
60

1  
2  
3 282 ACEs and preterm birth: Out of 31 studies, 12 [34, 38, 40, 42-48, 50, 55, 57] reported the  
4  
5 283 association between ACEs and preterm birth(**Table-2.2**). A study in Tunisia by Ben Salah et  
6  
7 284 al. (2019) reported that after adjustment for high-risk pregnancies, environmental tobacco  
8  
9 285 smoke, and intra-familial ACEs, the risk of premature birth was significantly associated with  
10  
11 286 exposure to collective violence (P-value< 0.001) and witnessing community violence (P-  
12  
13 287 value< 0.05). In another study, Harville et al[48] reported that violence exposure during  
14  
15 288 childhood was associated with a 44% increased risk of preterm birth (adjusted RR= 1.40; 95%  
16  
17 289 CI: 1.00-1.90). They also found the family mental health issues increased by 24%, and a 25%  
18  
19 290 increase in the risk of preterm birth. A case-control study in the USA by Selk et al[47] reported  
20  
21 291 that women exposed to forced sex during childhood had a 22% greater risk of preterm birth  
22  
23 292 (adjusted RR=1.2, 95% CI: 1.10-1.30) than those in the no exposure group. Furthermore,  
24  
25 293 exposure to physical and sexual abuse during childhood was associated with a 35% greater risk  
26  
27 294 of preterm birth (adjusted RR=1.30, 95% CI: 1.10-1.60). A study by Miller et al., reported that  
28  
29 295 mothers' childhood economic hardship was independently associated with multiple adverse  
30  
31 296 birth outcomes.[49]A study by Gillespie et al reported that maternal childhood abuse was  
32  
33 297 associated with birth timing (birth timing was operationalized as a days gestation at birth  
34  
35 298 continuous variable and calculated according to obstetric estimate of date of delivery and actual  
36  
37 299 date of delivery extracted from the prenatal and labor and delivery records).[52]  
38  
39  
40  
41  
42  
43  
44

45 300 ACEs and low birth weight:

46  
47  
48 301 Out of 31 studies, six [38, 42, 44, 48, 50, 53] reported an association between ACEs and low  
49  
50 302 birth weight (**Table-2.2**).  
51  
52  
53 303  
54  
55  
56  
57  
58  
59  
60



304 **Table-2.2: Summary of published measures of effect.**

| SI#                           | First Author/Pub Date    | Outcomes         | Types of ACEs and analytical unit   | Findings (OR, 95% CI)                                                           |
|-------------------------------|--------------------------|------------------|-------------------------------------|---------------------------------------------------------------------------------|
| 1                             | Christiaens et al., 2015 | Preterm birth    | High ACE score ( $\geq 2$ ACE)      | 2.09, (1.10–3.98)                                                               |
|                               |                          |                  | ACE's score (continuous)            | 1.18, (0.99–1.40)                                                               |
| 2                             | Grimstad et al., 1999    | Preterm birth    | Sexual Abuse                        | 1.03, (0.44–2.4)                                                                |
|                               |                          | Low birth weight | Sexual Abuse                        | 1.21, (0.5–2.93)                                                                |
| 3                             | Noll et al., 2007        | Preterm birth    | Sexual abuse                        | 2.16, (0.77–6.06)                                                               |
| 4                             | Leeners et al., 2014     | Preterm birth    | Sexual abuse                        | 2.47, (1.11–5.51)                                                               |
| 5                             | Selk et al., 2016        | Preterm birth    | Severe physical only                | 1.02, (0.88–1.17)                                                               |
|                               |                          |                  | Forced sex only                     | 1.22, (1.1–1.35)                                                                |
|                               |                          |                  | Experienced both severe abuse types | 1.35, (1.13–1.62)                                                               |
| 6                             | Harville et al., 2010    | Preterm birth    | Financial/structural hardship       | 1.20 (0.90–1.60)                                                                |
|                               |                          |                  | No interest in education            | 1.17 (0.93–1.48)                                                                |
|                               |                          |                  | Family dysfunction                  | 1.20 (0.94–1.52)                                                                |
|                               |                          |                  | Lack of supportive caregiving       | 0.98 (0.81–1.19)                                                                |
|                               |                          |                  | Violence/mental health issues       | 1.24 (0.94–1.63)                                                                |
|                               |                          |                  | Issues of family structure          | 1.25 (1.02–1.54)                                                                |
|                               |                          | Low birth weight | No. of hardships ( $\geq 4$ )       | 1.45 (1.09–1.93)                                                                |
|                               |                          |                  | Financial/structural hardship       | 1.18 (0.88–1.60)                                                                |
|                               |                          |                  | No interest in education:           | 1.18 (0.88–1.60)                                                                |
|                               |                          |                  | Family dysfunction                  | 1.18 (0.88–1.60)                                                                |
|                               |                          |                  | Lack of supportive caregiving       | 1.18 (0.88–1.60)                                                                |
|                               |                          |                  | Violence/mental health issues       | 1.48 (1.12–1.96)                                                                |
|                               |                          |                  | Issues of family structure          | 1.48 (1.12–1.96)                                                                |
| No. of hardships ( $\geq 4$ ) | 1.48 (1.12–1.96)         |                  |                                     |                                                                                 |
| 11                            | Miller et al., 2017      | Birth outcomes   | Childhood economic hardship         | Mother's hardship independently associated with multiple adverse birth outcomes |
| 12                            | Mersky et al., 2019      | Preterm birth    | ACE scores (continuous)             | 1.07, (1.01–1.12)                                                               |
|                               |                          |                  | 1 or 2 ACEs                         | 1.22 (0.79–1.89)                                                                |
|                               |                          |                  | 3 or 4 ACEs                         | 1.29 (0.82–2.02)                                                                |
|                               |                          |                  | 5 or more ACEs                      | 1.46 (0.95–2.26)                                                                |
|                               |                          | Low birthweight  | ACE scores (continuous)             | 1.08, (1.03–1.15)                                                               |
|                               |                          |                  | 1 or 2 ACEs                         | 0.98 (0.62–1.56)                                                                |
|                               |                          |                  | 3 or 4 ACEs                         | 1.22 (0.76–1.96)                                                                |
|                               |                          |                  | 5 or more ACEs                      | 1.39 (0.88–2.19)                                                                |
|                               |                          | Pregnancy loss   | ACE scores (continuous)             | 1.12, (1.08–1.17)                                                               |
|                               |                          |                  | 1 or 2 ACEs                         | 0.93 (0.66–1.31)                                                                |
|                               |                          |                  | 3 or 4 ACEs                         | 1.27 (0.89–1.80)                                                                |
|                               |                          |                  | 5 or more ACEs                      | 1.27 (0.89–1.80)                                                                |
| 14                            | Cammack et al., 2018     | Low Birth Weight | Emotional Abuse                     | 0.88 (0.66–1.00) Cohen's Kappas (95% CI)                                        |
|                               |                          |                  | Physical Abuse                      | 0.50 (0.01–0.99)                                                                |
|                               |                          |                  | Sexual Abuse                        | 0.75 (0.43–1.00)                                                                |
|                               |                          |                  | Emotional Neglect                   | 0.59 (0.18–1.00)                                                                |
|                               |                          |                  | Physical Neglect                    | 0.28 (–0.16–0.73)                                                               |

|    |                         |                                          |                   |                                                                                                                                                                                                                                                                   |
|----|-------------------------|------------------------------------------|-------------------|-------------------------------------------------------------------------------------------------------------------------------------------------------------------------------------------------------------------------------------------------------------------|
|    |                         | Preterm Birth                            | Emotional Abuse   | 0.78 (0.55–1.00)                                                                                                                                                                                                                                                  |
|    |                         |                                          | Physical Abuse    | 0.69 (0.36–1.00)                                                                                                                                                                                                                                                  |
|    |                         |                                          | Sexual Abuse      | 0.78 (0.55–1.00)                                                                                                                                                                                                                                                  |
|    |                         |                                          | Emotional Neglect | 0.44 (0.12–0.77)                                                                                                                                                                                                                                                  |
|    |                         |                                          | Physical Neglect  | 0.39 (–0.03–0.81)                                                                                                                                                                                                                                                 |
|    |                         | NICU Admission                           | Emotional Abuse   | 0.58 (0.25–0.91)                                                                                                                                                                                                                                                  |
|    |                         |                                          | Physical Abuse    | 0.28 (–0.15–0.71)                                                                                                                                                                                                                                                 |
|    |                         |                                          | Sexual Abuse      | 0.73 (0.45–1.00)                                                                                                                                                                                                                                                  |
|    |                         |                                          | Emotional Neglect | 0.55 (0.20–0.90)                                                                                                                                                                                                                                                  |
|    |                         |                                          | Physical Neglect  | 0.55 (0.20–0.90)                                                                                                                                                                                                                                                  |
| 16 | Ben Salah et al, 2019   | Preterm Birth<br>Low birth weight        | ACEs continuous   | After adjustment for high-risk pregnancies, environmental tobacco smoke, and intra-familial ACEs, the risk of premature birth was significantly associated with exposure to collective violence ( $P < 0.001$ ) and witnessing community violence ( $P < 0.05$ ). |
| 17 | Bhengu et al., 2019     | Preterm Birth                            | ACEs continuous   | 1.21, (1.03-1.43)                                                                                                                                                                                                                                                 |
| 18 | Gillespie et al. (2017) | Birth timing                             | ACEs continuous   | Cumulative childhood stress predicted birth timing ( $p = 0.01$ ).                                                                                                                                                                                                |
| 19 | Leeners et al, 2014     | Preterm Birth                            |                   | CSA, physical abuse as well as other ACE were associated with an increased risk for premature delivery                                                                                                                                                            |
| 21 | Shaikh et al., 2019     | Preterm Birth                            | ACEs continuous   | We found no association between ACE and preterm birth                                                                                                                                                                                                             |
| 22 | Smith et al., 2016      | Birth weight and shorter gestational age | ACEs continuous   | Each additional ACE decreased birth weight by 16.33 g and decreased gestational age by 0.063.                                                                                                                                                                     |
| 32 | Hardcastle et al., 2022 | Preterm Birth                            | 1 ACE             | 0.80 (0.32-2.00)                                                                                                                                                                                                                                                  |
|    |                         |                                          | 2–3 ACEs          | 1.17 (0.46-2.97)                                                                                                                                                                                                                                                  |
|    |                         |                                          | ≥4 ACEs           | 2.67 (1.14-6.23)                                                                                                                                                                                                                                                  |

305

306

1  
2  
3 307 Harville et al reported that violence exposure during childhood was associated with an  
4  
5 308 increased risk of low birth weight(adjusted OR= 1.5; 95% CI: 1.1-2.0). They also found that  
6  
7 309 violence/mental health issues (adjusted OR=1.4, 95% CI:1.1-1.9) and issues of family  
8  
9 310 structure increased the risk of low birth weight (adjusted OR=1.4, 95% CI:1.1-1.9). A study  
10  
11 311 by Smith et al. reported that each additional ACE decreased gestational age at birth as well as  
12  
13 312 birth weight.[53]  
14

15  
16  
17 313 Meta-analytic results for maternal ACEs and adverse pregnancy outcomes:  
18

19  
20 314 A total of 12studies were available for this quality-effects meta-analysis, which produced an  
21  
22 315 association between maternal ACEs and any adverse pregnancy outcomes (OR=1.31, 95% CI:  
23  
24 316 1.17-1.47). In a sub-analysis of eight studies (59,607participants), the quality-effects meta-  
25  
26 317 analysis showed an association between maternal ACEs and preterm birth (OR=1.41, 95% CI:  
27  
28 318 1.16-1.71). On the other hand, three studies (7,014 participants) were available for the quality-  
29  
30 319 effects meta-analysis for low birth weight, which showed an association between maternal  
31  
32 320 ACEs and low birth weight (OR=1.27, 95% CI: 1.17-1.47) (**Figure-3**). In low (one to three  
33  
34 321 ACEs) and high (four+) ACEs specific analysis, five studies reported low ACEs exposure and  
35  
36 322 nine studies reported high ACEs exposure. Both low (OR=1.27, 95% CI: 1.05-1.54) and high  
37  
38 323 (OR=1.41, 95% CI: 1.20-1.65) ACE exposure showed a significant association with any  
39  
40 324 adverse pregnancy outcome. For each additional unit increase in the number of ACEs, the odds  
41  
42 325 of adverse pregnancy outcomes increased 1.10 times (OR=1.10, 95% CI: 1.05-1.15)  
43  
44 326 (**Supplementary figure S2.1 and 2.2**).  
45  
46  
47  
48  
49  
50  
51  
52

53 328 **Discussion**  
54

55  
56 329 This systematic review and meta-analysis found that maternal ACEs were associated with an  
57  
58 330 increased risk of pregnancy complications including GDM, HDP, GWG and mental health  
59  
60

1  
2  
3 331 during pregnancy. Similarly, this study also found that maternal ACEs were associated with an  
4  
5 332 increased risk of adverse pregnancy outcomes including preterm birth and low birth weight.  
6  
7  
8 333 All these associations were stronger for 4 or more compared to less than 4 ACEs. There was a  
9  
10 334 dose-response association between ACEs and adverse pregnancy outcome. Overall, findings  
11  
12 335 of this study suggest there is a robust association between ACEs and pregnancy complications  
13  
14 336 and adverse pregnancy outcomes. Early prevention of ACEs might reduce the risk of pregnancy  
15  
16 337 complications and adverse outcomes.

17  
18  
19 338 To our knowledge, this is the first systematic review and meta-analysis to assess the association  
20  
21 339 between ACEs and pregnancy complications and adverse pregnancy outcomes. A recent  
22  
23 340 systematic review and meta-analysis reported an association between ACEs and maternal  
24  
25 341 depression and/or anxiety in the perinatal period (pregnancy to 1-year postpartum). [22] though  
26  
27 342 the results of our study are not directly comparable to this study because outcomes were  
28  
29 343 considered at different perinatal windows and results were presented differently (e.g., effect  
30  
31 344 size vs. odds ratio). Our results on maternal ACEs and increased risk of adverse pregnancy  
32  
33 345 outcomes are more comprehensive than previous systematic reviews [58][59][18] due to the  
34  
35 346 availability of 12 recent primary studies. Overall, the direction and strength of the associations  
36  
37 347 in our study is similar to these earlier studies [58][59][18].

38  
39 348 There could be several potential direct and indirect pathways to explain the relationship  
40  
41 349 between ACEs and pregnancy complications and adverse pregnancy outcomes. Direct  
42  
43 350 mechanisms may include altering the regulation of stress-signalling pathways [60] and immune  
44  
45 351 system function[61]; changing brain structure and function; and changing the expression of  
46  
47 352 DNA and by accelerating cellular ageing[62]. For example, abuse or neglect might directly lead  
48  
49 353 to malnutrition. Similarly, stress can directly lead to dysregulation of the hypothalamic  
50  
51 354 pituitary-adrenal axis and associated neuro-endocrine-immune[63] as well as epigenetic  
52  
53 355 effects[64]. Results from animal models [65, 66] and longitudinal human studies such as the  
54  
55  
56  
57  
58  
59  
60

1  
2  
3 356 Nurses' Health Study[35] have proposed that a strong history of ACEs may alter hypothalamic-  
4  
5 357 pituitary-adrenal axis as reflected by elevated cortisol levels that in turn alter glucose  
6  
7 358 metabolism and body weight regulation. Brain development begins in fetal life and continues  
8  
9  
10 359 into early adulthood. Early life maternal ACEs may alter the structure and function of the  
11  
12 360 brain.[67, 68] These neurodevelopmental alterations may result in neuroendocrine disruption  
13  
14 361 of cortisol regulation, linked to glucose metabolism [69, 70]. The experience of ACEs  
15  
16 362 increased the risk of physical or sexual abuse during pregnancy and is associated with placental  
17  
18 363 damage, uterine contractions, premature rupture of membranes, and genitourinary infections  
19  
20 364 which ultimately increase the risk of preterm birth and low birth weight[71]. Exposure to ACEs  
21  
22 365 is also associated with an increased risk of health risk behaviours including substance use,  
23  
24 366 physical inactivity and unhealthy diet[4]. Previous research has shown that ACEs are  
25  
26 367 associated with pre-pregnancy obesity.[72]In addition, it is also established that socioeconomic  
27  
28 368 status and cumulative disadvantage produces health disparities across the life course[73]. Any  
29  
30 369 of these mechanisms could explain the transgenerational nature of obesity and diabetes in  
31  
32 370 families affected by maternal ACEs. Chronic inflammation, unhealthy behaviours, poor sleep  
33  
34 371 and altered stress regulatory pathways are risk factors for adverse pregnancy complications,  
35  
36 372 including GDM, HDP and depression/anxiety [74, 75]. The interplay of these different  
37  
38 373 pathways remains largely unclear.  
39  
40  
41  
42  
43  
44  
45  
46  
47

48 375 According to our findings and other systematic review evidence, it may be valuable to assess  
49  
50 376 the role of routine ACEs screening during pregnancy to improve maternal and child health.  
51  
52 377 Trauma-informed care is not well incorporated into clinical practice guidelines. Much of the  
53  
54 378 emphasis in maternity care is on individual behaviour change, including advice about diet,  
55  
56 379 exercise, smoking cessation and uptake of clinical care. Approaches that do not incorporate the  
57  
58 380 personal experiences of trauma by women attending antenatal services may inadvertently cause  
59  
60

1  
2  
3 381 iatrogenic harm. For many years, there has been an interest in improving pregnancy outcomes  
4  
5 382 by focusing on a limited set of physical parameters that can easily be measured such as  
6  
7 383 gestational weight gain, without attention to the underlying mechanisms.[76, 77] Overall,  
8  
9 384 studies of diet and exercise in pregnancy to reduce GDM, HDP and other adverse pregnancy  
10  
11 385 outcomes have been disappointing.[78]

12  
13  
14  
15 386 A recent scoping review by Tran et al.[79] found that healthcare providers perceive that they  
16  
17 387 are not being trained to screen for ACEs in their undergraduate training program or in their  
18  
19 388 professional training in clinical settings. In addition, healthcare workers already have a high  
20  
21 389 demand on their time and limited capacity to incorporate new practices without additional  
22  
23 390 resources. There is some controversy about whether screening for ACEs is a safe and ethical  
24  
25 391 practice, especially if the consequences of discussing ACEs (e.g. effects on mental health)  
26  
27 392 cannot be readily addressed[80, 81]. These identified barriers are similar to those reported by  
28  
29 393 healthcare providers in relation to ACE screening in general clinical settings[82]. Healthcare  
30  
31 394 providers may appreciate the importance of asking about ACEs to help raise issues that  
32  
33 395 otherwise would be unknown and unaddressed[79]. Furthermore, Mishra et al[83] found that  
34  
35 396 ACEs screening did not excessively disrupt clinic workflow. and was both acceptable for the  
36  
37 397 patient and feasible for the provider. However, to determine if screening for ACEs is  
38  
39 398 worthwhile, studies need to assess if trauma-informed clinical care translates to improved  
40  
41 399 clinical outcomes for mother and offspring.[84]Beyond screening for ACEs, our findings  
42  
43 400 emphasise the importance of preventing ACEs in children to reduce immediate impacts as well  
44  
45 401 as intergenerational transmission of ACEs. As well as supporting clinicians and providing  
46  
47 402 services to address ACEs, there is growing awareness of the crucial role of upstream policy-  
48  
49 403 and community-level interventions to improve and support positive family and social  
50  
51 404 environments and a need for wide-scale testing of the effectiveness of such  
52  
53 405 interventions[85][86].  
54  
55  
56  
57  
58  
59  
60

1  
2  
3 406 There are some limitations to the current study, which reduce the generalisability of the  
4  
5 407 findings. Firstly, most of the included studies are from high-income western countries.  
6  
7 408 Secondly, due to the lack of data, we could not conduct the ACEs item-specific analysis.  
8  
9 409 Thirdly, the dose-response relationship in all studies could not be assessed as different studies  
10  
11 410 use different screening tools and cut-off values. Only five studies exploring pregnancy  
12  
13 411 complications and five studies investigating adverse pregnancy outcomes could be assessed for  
14  
15 412 a dose response relationship. Lastly, as we considered various types of ACE exposures in a  
16  
17 413 single review, we expected much heterogeneity in the study methodologies, populations,  
18  
19 414 exposures, and outcome identification. To address these limitations, the Quality Effect model,  
20  
21 415 which incorporates the heterogeneity of effects across the studies and reduces the risk-of-bias  
22  
23 416 assessment was used in the meta-analysis. Nevertheless, our study has several strengths  
24  
25 417 considering the comprehensive nature of the inclusion criteria, including relevant studies  
26  
27 418 published up to July 2021. In addition, we assessed the methodological quality of studies using  
28  
29 419 standard tools appropriate for observational cohort and cross-sectional studies.  
30  
31  
32  
33  
34  
35

## 36 420 **Conclusion**

37  
38  
39 421 In conclusion, this systematic review and meta-analysis found that exposure to ACEs  
40  
41 422 increases the risk of pregnancy complications and adverse pregnancy outcomes.  
42  
43 423 Identification of women exposed to ACEs and personalising their care may provide  
44  
45 424 opportunities to improve maternal and child mental and physical health.  
46  
47  
48

## 49 425 **Contribution to authorship**

50  
51  
52 426 AAM and TB contributed towards literature search, data analysis and interpretation, figures  
53  
54 427 and tables, and writing of the manuscript. AAM, TB, LC, JS, PS contributed towards the  
55  
56 428 drafting of the protocol, review of the study design, data collection and interpretation and  
57  
58 429 provided a critical review of the manuscript. AAM and SD contributed towards data  
59  
60

1  
2  
3 430 management and analysis plan and provided oversight and interpretation of the analyses. AAM,  
4  
5 431 DM, KT, FB, MN, MM, KM, AK, LH contributed towards the study design and editing. AAM  
6  
7 432 and LC contributed towards the design of the manuscript, development of the protocol, and  
8  
9 433 critical evaluation and interpretation of the results and critical review of the manuscript.  
10  
11  
12

### 13 434 **Disclosure of interests**

14  
15  
16 435 All other authors declare no competing interests.  
17  
18  
19 436

### 20 21 437 **Details of ethics approval**

22  
23  
24  
25 438 None  
26  
27 439

### 28 29 440 **Funding**

30  
31  
32  
33 441 This research was partially supported by the Australian Research Council Centre of  
34  
35 442 Excellence for Children and Families over the Life Course (CE200100025).  
36  
37

38 443 Data Availability: No additional data available.  
39  
40 444  
41  
42  
43  
44  
45  
46  
47  
48  
49  
50  
51  
52  
53  
54  
55  
56  
57  
58  
59  
60



1  
2  
3  
4  
5  
6  
7  
8  
9  
10  
11  
12  
13  
14  
15  
16  
17  
18  
19  
20  
21  
22  
23  
24  
25  
26  
27  
28  
29  
30  
31  
32  
33  
34  
35  
36  
37  
38  
39  
40  
41  
42  
43  
44  
45  
46  
47  
48  
49  
50  
51  
52  
53  
54  
55  
56  
57  
58  
59  
60

445  
446

For peer review only

1  
2  
3 447 **Figure-1: PRISMA diagram outlining the search strategy and selection of studies**  
4 448 **included in this review.**  
5

6 449 **Figure-2: Association of any ACE exposure with risk of pregnancy complications**  
7

8 450 **Figure-3: Association of any ACE exposure and adverse pregnancy outcomes**  
9

10 451  
11  
12

13 452  
14  
15

16 453  
17  
18  
19  
20  
21  
22  
23  
24  
25  
26  
27  
28  
29  
30  
31  
32  
33  
34  
35  
36  
37  
38  
39  
40  
41  
42  
43  
44  
45  
46  
47  
48  
49  
50  
51  
52  
53  
54  
55  
56  
57  
58  
59  
60

For peer review only

## References:

1. Atzl, V.M., et al., *Adverse childhood experiences and prenatal mental health: Type of ACEs and age of maltreatment onset*. Journal of family psychology, 2019. **33**(3): p. 304.
2. Hughes, K., et al., *The effect of multiple adverse childhood experiences on health: a systematic review and meta-analysis*. The Lancet Public Health, 2017. **2**(8): p. e356-e366.
3. Wickramasinghe, Y.M., et al., *Burden of adverse childhood experiences in children attending paediatric clinics in South Western Sydney, Australia: a retrospective audit*. BMJ paediatrics open, 2019. **3**(1).
4. Felitti, V.J., et al., *Relationship of childhood abuse and household dysfunction to many of the leading causes of death in adults: The Adverse Childhood Experiences (ACE) Study*. American journal of preventive medicine, 1998. **14**(4): p. 245-258.
5. Petruccelli, K., J. Davis, and T. Berman, *Adverse childhood experiences and associated health outcomes: A systematic review and meta-analysis*. Child abuse & neglect, 2019. **97**: p. 104127.
6. Schroeder, K., et al., *The association between adverse childhood experiences and childhood obesity: A systematic review*. Obesity Reviews, 2021. **22**(7): p. e13204.
7. Kuh, D., et al., *Life course epidemiology*. Journal of epidemiology and community health, 2003. **57**(10): p. 778.
8. Stanhope, K.K., et al., *Adverse childhood experiences and lifetime adverse maternal outcomes (gestational diabetes and hypertensive disorders of pregnancy) in the Hispanic Community Health Study/Study of Latinos*. Annals of Epidemiology, 2020. **50**: p. 1-6.
9. Schetter, C.D. and L. Tanner, *Anxiety, depression and stress in pregnancy: implications for mothers, children, research, and practice*. Current opinion in psychiatry, 2012. **25**(2): p. 141.
10. Olsen, J.M., *Integrative review of pregnancy health risks and outcomes associated with adverse childhood experiences*. Journal of Obstetric, Gynecologic & Neonatal Nursing, 2018. **47**(6): p. 783-794.
11. Dachew, B.A., et al., *Association between hypertensive disorders of pregnancy and the development of offspring mental and behavioural problems: a systematic review and meta-analysis*. Psychiatry research, 2018. **260**: p. 458-467.
12. Montgomery, E., C. Pope, and J. Rogers, *A feminist narrative study of the maternity care experiences of women who were sexually abused in childhood*. Midwifery, 2015. **31**(1): p. 54-60.
13. Montgomery, E., C. Pope, and J. Rogers, *The re-enactment of childhood sexual abuse in maternity care: a qualitative study*. BMC pregnancy and childbirth, 2015. **15**(1): p. 1-7.
14. Lê-Scherban, F., et al., *Intergenerational associations of parent adverse childhood experiences and child health outcomes*. Pediatrics, 2018. **141**(6).
15. Schoenaker, D.A., L.K. Callaway, and G.D. Mishra, *The role of childhood adversity in the development of gestational diabetes*. American journal of preventive medicine, 2019. **57**(3): p. 302-310.
16. Versteegen, M., et al., *Maternal depression, adverse childhood experiences, and social support in relation to gestational diabetes risk: results from the Albany Infant and Mother Study (AIMS)*. BMC Pregnancy and Childbirth, 2021. **21**(1): p. 1-7.
17. Sulaiman, S., et al., *Total Adverse Childhood Experiences and Preterm Birth: A Systematic Review*. Maternal and Child Health Journal, 2021: p. 1-14.
18. Nesari, M., et al., *Does a maternal history of abuse before pregnancy affect pregnancy outcomes? A systematic review with meta-analysis*. BMC pregnancy and childbirth, 2018. **18**(1): p. 1-11.
19. Shamseer, L., et al., *Preferred reporting items for systematic review and meta-analysis protocols (PRISMA-P) 2015: elaboration and explanation*. Bmj, 2015. **349**.
20. Stroup, D.F., et al., *Meta-analysis of observational studies in epidemiology: a proposal for reporting*. Jama, 2000. **283**(15): p. 2008-2012.

- 1
  - 2
  - 3
  - 4
  - 5
  - 6
  - 7
  - 8
  - 9
  - 10
  - 11
  - 12
  - 13
  - 14
  - 15
  - 16
  - 17
  - 18
  - 19
  - 20
  - 21
  - 22
  - 23
  - 24
  - 25
  - 26
  - 27
  - 28
  - 29
  - 30
  - 31
  - 32
  - 33
  - 34
  - 35
  - 36
  - 37
  - 38
  - 39
  - 40
  - 41
  - 42
  - 43
  - 44
  - 45
  - 46
  - 47
  - 48
  - 49
  - 50
  - 51
  - 52
  - 53
  - 54
  - 55
  - 56
  - 57
  - 58
  - 59
  - 60
21. <https://www.nichd.nih.gov/health/topics/pregnancy>.
22. Racine, N., et al., *Adverse childhood experiences and maternal anxiety and depression: a meta-analysis*. BMC psychiatry, 2021. **21**(1): p. 1-10.
23. Shor, E., D. Roelfs, and Z.M. Vang, *The "Hispanic mortality paradox" revisited: meta-analysis and meta-regression of life-course differentials in Latin American and Caribbean immigrants' mortality*. Social Science & Medicine, 2017. **186**: p. 20-33.
24. Borenstein, M., et al., *Basics of meta-analysis: I2 is not an absolute measure of heterogeneity*. Research synthesis methods, 2017. **8**(1): p. 5-18.
25. Furuya-Kanamori, L., J.J. Barendregt, and S.A.R. Doi, *A new improved graphical and quantitative method for detecting bias in meta-analysis*. International journal of evidence-based healthcare, 2018. **16**(4): p. 195-203.
26. Barendregt, J.J. and S.A. Doi, *MetaXL user guide version 5.3*. EpiGear International Pty Ltd, 2016.
27. Fredriksen, E., et al., *Patterns of pregnancy and postpartum depressive symptoms: Latent class trajectories and predictors*. Journal of Abnormal Psychology, 2017. **126**(2): p. 173.
28. Hantsoo, L., et al., *Childhood adversity impact on gut microbiota and inflammatory response to stress during pregnancy*. Brain, behavior, and immunity, 2019. **75**: p. 240-250.
29. Howell, K.H., et al., *Relational resilience as a potential mediator between adverse childhood experiences and prenatal depression*. Journal of health psychology, 2020. **25**(4): p. 545-557.
30. Letourneau, N., et al., *Intergenerational transmission of adverse childhood experiences via maternal depression and anxiety and moderation by child sex*. Journal of developmental origins of health and disease, 2019. **10**(1): p. 88-99.
31. Narayan, A.J., et al., *Positive childhood experiences predict less psychopathology and stress in pregnant women with childhood adversity: A pilot study of the benevolent childhood experiences (BCEs) scale*. Child abuse & neglect, 2018. **78**: p. 19-30.
32. Racine, N., et al., *Perinatal depression: the role of maternal adverse childhood experiences and social support*. Journal of affective disorders, 2020. **263**: p. 576-581.
33. Young-Wolff, K.C., et al., *Adverse childhood experiences and mental and behavioral health conditions during pregnancy: the role of resilience*. Journal of Women's Health, 2019. **28**(4): p. 452-461.
34. Christiaens, I., K. Hegadoren, and D.M. Olson, *Adverse childhood experiences are associated with spontaneous preterm birth: a case-control study*. BMC medicine, 2015. **13**(1): p. 1-9.
35. Mason, S.M., et al., *Abuse in Childhood or Adolescence and Gestational Diabetes: a retrospective cohort study*. American journal of preventive medicine, 2016. **50**(4): p. 436-444.
36. McDonnell, C.G. and K. Valentino, *Intergenerational effects of childhood trauma: evaluating pathways among maternal ACEs, perinatal depressive symptoms, and infant outcomes*. Child maltreatment, 2016. **21**(4): p. 317-326.
37. Appleton, A.A., et al., *Social support during pregnancy modifies the association between maternal adverse childhood experiences and infant birth size*. Maternal and child health journal, 2019. **23**(3): p. 408-415.
38. Salah, A.B., et al., *Impact of social violence and childhood adversities on pregnancy outcomes: a longitudinal study in Tunisia*. Journal of global health, 2019. **9**(2).
39. Bhengu, B.S., et al., *The role of adverse childhood experiences on perinatal substance use behaviour in KwaZulu-Natal Province, South Africa*. AIDS and Behavior, 2020. **24**(6): p. 1643-1652.
40. Shaikh, K., et al., *Ethnic disparity and exposure to supplements rather than adverse childhood experiences linked to preterm birth in Pakistani women*. Journal of affective disorders, 2020. **267**: p. 49-56.
41. Barrios, Y.V., et al., *Association of childhood physical and sexual abuse with intimate partner violence, poor general health and depressive symptoms among pregnant women*. PloS one, 2015. **10**(1): p. e0116609.

- 1
- 2
- 3
- 4 42. Mersky, J.P. and C.P. Lee, *Adverse childhood experiences and poor birth outcomes in a diverse, low-income sample*. BMC pregnancy and childbirth, 2019. **19**(1): p. 1-7.
- 5
- 6 43. Do, H.P., et al., *Intergenerational effects of violence on women's perinatal wellbeing and infant health outcomes: evidence from a birth cohort study in Central Vietnam*. BMC pregnancy and childbirth, 2021. **21**(1): p. 1-14.
- 7
- 8
- 9 44. Grimstad, H. and B. Schei, *Pregnancy and delivery for women with a history of child sexual abuse*. Child abuse & neglect, 1999. **23**(1): p. 81-90.
- 10
- 11 45. Noll, J.G., et al., *Differential pathways to preterm delivery for sexually abused and comparison women*. Journal of pediatric psychology, 2007. **32**(10): p. 1238-1248.
- 12
- 13 46. Leeners, B., et al., *Risk factors for unfavorable pregnancy outcome in women with adverse childhood experiences*. Journal of Perinatal Medicine, 2014. **42**(2): p. 171-178.
- 14
- 15 47. Selk, S.C., et al., *An observational study of type, timing, and severity of childhood maltreatment and preterm birth*. J Epidemiol Community Health, 2016. **70**(6): p. 589-595.
- 16
- 17 48. Harville, E.W., et al., *Childhood hardship, maternal smoking, and birth outcomes: a prospective cohort study*. Archives of pediatrics & adolescent medicine, 2010. **164**(6): p. 533-539.
- 18
- 19 49. Miller, G.E., et al., *Mothers' childhood hardship forecasts adverse pregnancy outcomes: role of inflammatory, lifestyle, and psychosocial pathways*. Brain, behavior, and immunity, 2017. **65**: p. 11-19.
- 20
- 21
- 22
- 23 50. Cammack, A.L., et al., *An exploratory study of whether pregnancy outcomes influence maternal self-reported history of child maltreatment*. Child abuse & neglect, 2018. **85**: p. 145-155.
- 24
- 25
- 26
- 27 51. Bala, K., et al., *The Association between Adverse Childhood Experiences and Diabetes Status during Pregnancy among Women in Rhode Island, 2016-2018*. Rhode Island Medical Journal, 2020. **103**(9): p. 52-55.
- 28
- 29
- 30 52. Gillespie, S.L., et al., *Childhood stress and birth timing among African American women: Cortisol as biological mediator*. Psychoneuroendocrinology, 2017. **84**: p. 32-41.
- 31
- 32 53. Smith, M.V., N. Gotman, and K.A. Yonkers, *Early childhood adversity and pregnancy outcomes*. Maternal and child health journal, 2016. **20**(4): p. 790-798.
- 33
- 34 54. Ranchod, Y.K., et al., *Maternal childhood adversity, prepregnancy obesity, and gestational weight gain*. American journal of preventive medicine, 2016. **50**(4): p. 463-469.
- 35
- 36 55. Hardcastle, K., K. Ford, and M.A. Bellis, *Maternal adverse childhood experiences and their association with preterm birth: secondary analysis of data from universal health visiting*. BMC pregnancy and childbirth, 2022. **22**(1): p. 1-11.
- 37
- 38 56. Schoenaker, D.A.J.M., L.K. Callaway, and G.D. Mishra, *The Role of Childhood Adversity in the Development of Gestational Diabetes*. American Journal of Preventive Medicine, 2019. **57**(3): p. 302-310.
- 39
- 40
- 41 57. Bhengu, B.S., et al., *The role of adverse childhood experiences on perinatal substance use behaviour in KwaZulu-Natal Province, South Africa*. AIDS and Behavior, 2019: p. 1-10.
- 42
- 43 58. Leeners, B., et al., *Influence of childhood sexual abuse on pregnancy, delivery, and the early postpartum period in adult women*. Journal of psychosomatic research, 2006. **61**(2): p. 139-151.
- 44
- 45 59. Wosu, A.C., B. Gelaye, and M.A. Williams, *Maternal history of childhood sexual abuse and preterm birth: an epidemiologic review*. BMC pregnancy and childbirth, 2015. **15**(1): p. 1-9.
- 46
- 47 60. Elwenspoek MMC, Kuehn A, Muller CP, Turner JD. *The effects of early life adversity on the immune system*. Psychoneuroendocrinology 2017;82:140-54.
- 48
- 49 61. Bick J, Zhu T, Stamoulis C, Fox NA, Zeanah C, Nelson CA. *Effect of early institutionalization and foster care on long-term white matter development: a randomized clinical trial*. JAMA Pediatr 2015;169:211-9.
- 50
- 51 62. Marini S, Davis KA, Soare TW, et al. *Adversity exposure during sensitive periods predicts accelerated epigenetic aging in children*. Psychoneuroendocrinology 2020;113:104484.
- 52
- 53
- 54
- 55
- 56
- 57
- 58
- 59
- 60

- 1
  - 2
  - 3
  - 4
  - 5
  - 6
  - 7
  - 8
  - 9
  - 10
  - 11
  - 12
  - 13
  - 14
  - 15
  - 16
  - 17
  - 18
  - 19
  - 20
  - 21
  - 22
  - 23
  - 24
  - 25
  - 26
  - 27
  - 28
  - 29
  - 30
  - 31
  - 32
  - 33
  - 34
  - 35
  - 36
  - 37
  - 38
  - 39
  - 40
  - 41
  - 42
  - 43
  - 44
  - 45
  - 46
  - 47
  - 48
  - 49
  - 50
  - 51
  - 52
  - 53
  - 54
  - 55
  - 56
  - 57
  - 58
  - 59
  - 60
63. Danese, A., *The hidden wounds of childhood trauma: Psychoneuroimmunology of early stress and the impact on mental health*. Brain and Neuroscience Advances, 2017. **1**: p. 345-346.
64. Thaler L, Steiger H. *Eating disorders and epigenetics*. Adv Exp Med Biol 2017;978:93-103. .
65. Sadeghimahalli, F., H. Zardooz, and R. Golchoobian, *Early postnatal hypothalamic-pituitary-adrenal axis activity and reduced insulin sensitivity in adult rats*. Endocrine regulations, 2019. **53**(4): p. 213-220.
66. Chen, Y.-T., et al., *Excessive glucocorticoids during pregnancy impair fetal brown fat development and predispose offspring to metabolic dysfunctions*. Diabetes, 2020. **69**(8): p. 1662-1674.
67. Bick, J. and C.A. Nelson, *Early adverse experiences and the developing brain*. Neuropsychopharmacology, 2016. **41**(1): p. 177-196.
68. Kornmeier, J. and M. Bach, *Ambiguous figures—what happens in the brain when perception changes but not the stimulus*. Frontiers in human neuroscience, 2012. **6**: p. 51.
69. Nusslock, R. and G.E. Miller, *Early-life adversity and physical and emotional health across the lifespan: A neuroimmune network hypothesis*. Biological psychiatry, 2016. **80**(1): p. 23-32.
70. Danese, A. and B.S. McEwen, *Adverse childhood experiences, allostasis, allostatic load, and age-related disease*. Physiology & behavior, 2012. **106**(1): p. 29-39.
71. Adcock, A., Bate, A., & Woodhouse, J. (2016). Effect of social media on the mental health of young people. Retrieved from <http://researchbriefings.parliament.uk/ResearchBriefing/Summary/CDP2016-0196>.
72. Hollingsworth, K., et al., *The association between maltreatment in childhood and pre-pregnancy obesity in women attending an antenatal clinic in Australia*. PLoS One, 2012. **7**(12): p. e51868.
73. Seabrook, J.A. and W.R. Avison, *Socioeconomic status and cumulative disadvantage processes across the life course: implications for health outcomes*. Canadian Review of Sociology/Revue canadienne de sociologie, 2012. **49**(1): p. 50-68.
74. Cornelius, D.C., et al., *Inflammatory mediators: a causal link to hypertension during preeclampsia*. British journal of pharmacology, 2019. **176**(12): p. 1914-1921.
75. Rodrigo, N. and S.J. Glastras, *The emerging role of biomarkers in the diagnosis of gestational diabetes mellitus*. Journal of clinical medicine, 2018. **7**(6): p. 120.
76. Dodd, J.M., et al., *Limiting weight gain in overweight and obese women during pregnancy to improve health outcomes: the LIMIT randomised controlled trial*. BMC pregnancy and Childbirth, 2011. **11**(1): p. 1-5.
77. Poston, L., et al., *Effect of a behavioural intervention in obese pregnant women (the UPBEAT study): a multicentre, randomised controlled trial*. The lancet Diabetes & endocrinology, 2015. **3**(10): p. 767-777.
78. in Pregnancy, T.I.W.M. and C. Group, *Effect of diet and physical activity based interventions in pregnancy on gestational weight gain and pregnancy outcomes: meta-analysis of individual participant data from randomised trials*. The BMJ, 2017. **358**.
79. Tran, N, Callaway L, Shen S, Biswas T, Scott J, Boyle F, Mamun AA. *Screening for adverse childhood experiences in antenatal care settings: A scoping review*. Aust N Z J Obstet Gynaecol. 2022 Jul 31. doi: 10.1111/ajo.13585. .
80. Gillespie RJ. *Screening for Adverse Childhood Experiences in Pediatric Primary Care: Pitfalls and Possibilities*. Pediatr Ann. 2019 Jul 1;48(7):e257-e261.
81. Campbell, T. L. (2020). *Screening for adverse childhood experiences (ACEs) in primary care: A cautionary note*. JAMA, 323(23), 2379-2380.
82. Ereyi-Osas Whitney, Racine Nicole, Sheri M. *Asking about adverse childhood experiences (ACEs) in prenatal and pediatric primary care: A Narrative Review and Critique 2020*.
83. Mishra, K., et al., *Screening for adverse childhood experiences in preventive medicine settings: a scoping review*. Journal of Public Health, 2021: p. 1-10.

- 1  
2  
3 84. Gentry, S. and B. Paterson, *Does screening or routine enquiry for adverse childhood*  
4 *experiences (ACEs) meet criteria for a screening programme? A rapid evidence summary.*  
5 *Journal of Public Health*, 2021.  
6  
7 85. Courtin, E., et al., *The role of socioeconomic interventions in reducing exposure to Adverse*  
8 *Childhood Experiences: A systematic review.* *Current Epidemiology Reports*, 2019. **6**(4): p. 423-  
9 441.  
10 86. Gervin, D.W., et al., *Centers for Disease Control and Prevention investments in adverse*  
11 *childhood experience prevention efforts.* *American Journal of Preventive Medicine*, 2022.  
12 **62**(6): p. S1-S5.  
13  
14  
15  
16  
17  
18  
19  
20  
21  
22  
23  
24  
25  
26  
27  
28  
29  
30  
31  
32  
33  
34  
35  
36  
37  
38  
39  
40  
41  
42  
43  
44  
45  
46  
47  
48  
49  
50  
51  
52  
53  
54  
55  
56  
57  
58  
59  
60

For peer review only

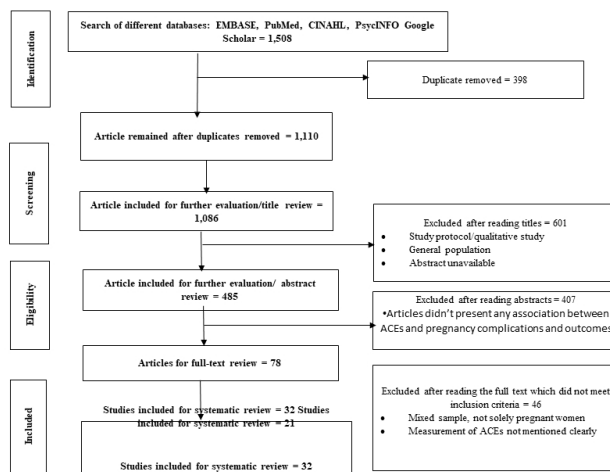

Figure-1: PRISMA diagram outlining the search strategy and selection of studies included in this review.

338x190mm (96 x 96 DPI)



1  
2  
3  
4  
5  
6  
7  
8  
9  
10  
11  
12  
13  
14  
15  
16  
17  
18  
19  
20  
21  
22  
23  
24  
25  
26  
27  
28  
29  
30  
31  
32  
33  
34  
35  
36  
37  
38  
39  
40  
41  
42  
43  
44  
45  
46  
47  
48  
49  
50  
51  
52  
53  
54  
55  
56  
57  
58  
59  
60

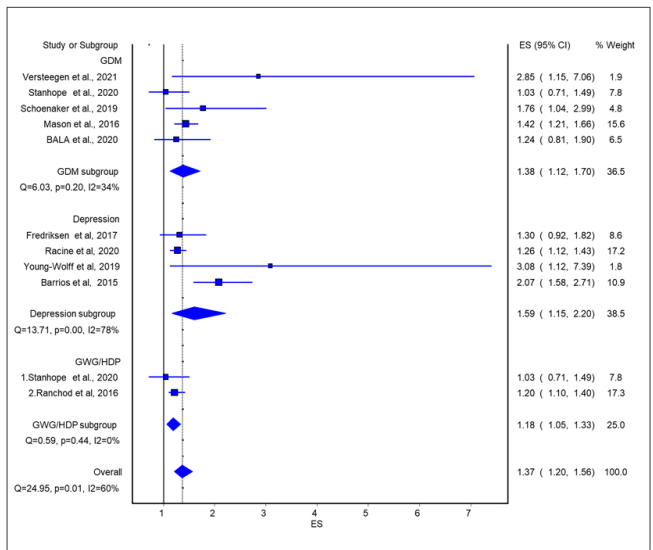

338x190mm (96 x 96 DPI)



338x190mm (96 x 96 DPI)



16  
17 **Supplementary figure -1.1: Association of  $\geq 4$  ACEs and adverse pregnancy complications**  
18  
19



33 **Supplementary figure -1.2: Association of  $< 4$  ACEs and adverse pregnancy complications**  
34  
35  
36  
37  
38  
39  
40  
41  
42  
43  
44  
45  
46  
47  
48  
49  
50  
51  
52  
53  
54  
55  
56  
57  
58  
59  
60



Supplementary figure -2.1: Association of  $\geq 4$  ACEs and adverse pregnancy outcomes



Supplementary figure -2.2: Association of  $< 4$  ACEs and adverse pregnancy outcomes

Supplementary Table S1: Search details

|                                | #  |                                                                                       |
|--------------------------------|----|---------------------------------------------------------------------------------------|
| <b>ACES</b>                    | 1  | 'Adverse childhood experiences'/exp OR 'adverse childhood experiences'                |
|                                | 2  | 'Childhood adversities'                                                               |
|                                | 3  | 'Childhood abuse'                                                                     |
|                                | 4  | 'Childhood maltreatment'                                                              |
|                                | 5  | 'Child trauma'                                                                        |
|                                | 6  | 'Adverse childhood events'                                                            |
|                                | 7  | 'Childhood sexual abuse'                                                              |
|                                | 8  | 'Childhood physical abuse'                                                            |
|                                | 9  | 'Childhood mental abuse'                                                              |
|                                | 10 | 'Childhood trauma'                                                                    |
|                                | 11 | 'Childhood violence'                                                                  |
|                                | 12 | 'Childhood hardship'                                                                  |
|                                | 13 | 'Childhood suffering'                                                                 |
|                                | 14 | 'Childhood stress'                                                                    |
|                                | 15 | #1 OR #2 OR #3 OR #4 OR #5 OR #6 OR #7 OR #8 OR #9 OR #10 OR #11 OR #12 OR #13 OR #14 |
| <b>Pregnancy complications</b> | 16 | 'Pregnancy complications'                                                             |
|                                | 17 | 'depression'                                                                          |
|                                | 18 | 'anxiety'                                                                             |
|                                | 19 | 'Prenatal depression'                                                                 |
|                                | 20 | 'Depressive symptoms'                                                                 |
|                                | 21 | 'Antenatal depression'                                                                |
|                                | 22 | 'Mental health problem'                                                               |
|                                | 23 | 'Gestational diabetes mellitus'                                                       |
|                                | 24 | 'GDM'                                                                                 |
|                                | 25 | 'Hypertensive disorder of pregnancy'                                                  |
|                                | 26 | 'HDP'                                                                                 |

|                           |    |                                                                                                                                                        |
|---------------------------|----|--------------------------------------------------------------------------------------------------------------------------------------------------------|
|                           | 27 | 'preeclampsia'                                                                                                                                         |
|                           | 28 | 'Maternal body weight'                                                                                                                                 |
|                           | 29 | 'Excess weight gain'                                                                                                                                   |
| <b>Pregnancy outcomes</b> | 30 | 'Abnormal fetal growth'                                                                                                                                |
|                           | 31 | 'Intrauterine growth restriction'                                                                                                                      |
|                           | 32 | 'Low birth weight'                                                                                                                                     |
|                           | 33 | 'LBW'                                                                                                                                                  |
|                           | 34 | 'IUGR'                                                                                                                                                 |
|                           | 35 | stillbirth                                                                                                                                             |
|                           | 36 | 'Small of gestational age'                                                                                                                             |
|                           | 37 | 'Preterm birth'                                                                                                                                        |
|                           | 38 | #16 OR #17 OR #18 OR #19 OR #20 OR #21 OR #22 OR #23 OR #24 OR #25 OR #26 OR #27 OR #28 OR #29 OR #30 OR #31 OR #32 OR #33 OR #34 OR #35 OR #36 OR #37 |
|                           | 39 | #15 AND #38                                                                                                                                            |

**Supplementary Table S2: Quality assessment tools**

| <b>Study Quality Evaluation</b> |                                                                                                                                                                                                                                         |               |
|---------------------------------|-----------------------------------------------------------------------------------------------------------------------------------------------------------------------------------------------------------------------------------------|---------------|
| <b>Item</b>                     | <b>Question</b>                                                                                                                                                                                                                         | <b>Coding</b> |
| 1. Question                     | Was the research question or objective in this paper clearly stated?                                                                                                                                                                    | 0-No<br>1-Yes |
| 2. Population                   | Was the study population clearly specified and defined?                                                                                                                                                                                 | 0-No<br>1-Yes |
| 3. Participation                | Was the participation rate of eligible persons at least 50%?                                                                                                                                                                            | 0-No<br>1-Yes |
| 4. Inclusion/Exclusion Criteria | Were all the subjects selected or recruited from the same or similar populations (including the same time period)? Were inclusion and exclusion criteria for being in the study prespecified and applied uniformly to all participants? | 0-No<br>1-Yes |
| 5. Sample Size                  | Was a sample size justification, power description, or variance and effect estimates provided?                                                                                                                                          | 0-No<br>1-Yes |
| 6.                              | For the analyses in this paper, were the exposure(s) of interest measured prior to the outcome(s) being measured?                                                                                                                       | 0-No<br>1-Yes |
| 7. Timeframe                    | Was the timeframe sufficient so that one could reasonably expect to see an association between exposure and outcome if it existed?                                                                                                      | 0-No<br>1-Yes |
| 8. Levels of Exposure           | For exposures that can vary in amount or level, did the study examine different levels of the exposure as related to the outcome (e.g., categories of exposure, or exposure measured as continuous variable)?                           | 0-No<br>1-Yes |
| 9. Independent Variable         | Were the exposure measures (independent variables) clearly defined, valid, reliable, and                                                                                                                                                | 0-No<br>1-Yes |

|                                      |                                                                                                                                                                                                                           |                                                       |
|--------------------------------------|---------------------------------------------------------------------------------------------------------------------------------------------------------------------------------------------------------------------------|-------------------------------------------------------|
|                                      | implemented consistently across all study participants?                                                                                                                                                                   |                                                       |
| 10. Longitudinal/Repeated ACEs       | Was the exposure(s) assessed more than once over time?                                                                                                                                                                    | 0-No<br>1-Yes                                         |
| 11. Dependent Variable               | Were the outcome measures (dependent variables) clearly defined, valid, reliable, and implemented consistently across all study participants?                                                                             | 0-No<br>1-Yes                                         |
| 12. Objectivity independent variable | Does the study use objective reports or multiple-methods to measure maternal ACEs?<br><br>Objective measure = child abuse reports<br><br>Multiple methods = self-report and corroborated reports.                         | 0-self report<br>1-objective measure/multiple methods |
| 13. Objective dependent variables    | Does the study use different reporters or multiple-methods to measure maternal health/mental health outcomes?<br><br>Objective measure = hospital report, diagnosis by physician, measurement by health care professional | 0-self report<br>1-objective measure/multiple methods |
| 14. Lost to Follow-Up                | Was loss to follow-up after baseline 20% or less?                                                                                                                                                                         | 0-No<br>1-Yes                                         |
| 15. Confounder                       | Were key potential confounding variables measured and adjusted statistically for their impact on the relationship between exposure(s) and outcome(s)?                                                                     | 0-No<br>1-Yes                                         |
| <b>Total</b>                         | A sum of all items was calculated to obtain a total quality score (0-15).                                                                                                                                                 |                                                       |



Supplementary Table S3: Quality of the study

| Sl# | First Author/Pub Date         | Question | Population | Participation | Inclusion/Exclusion Criteria | Sample Size | Exposures | Timeframe | Levels of Bias | Independent Variables | Longitudinal/Repeated ACEs | Dependent Variable | Objectivity independent variable | Objective dependent variables | Lost to Follow-up | Confounder | Overall | Quality score |
|-----|-------------------------------|----------|------------|---------------|------------------------------|-------------|-----------|-----------|----------------|-----------------------|----------------------------|--------------------|----------------------------------|-------------------------------|-------------------|------------|---------|---------------|
| 1   | Christiaens/2015              | 1        | 1          | 0             | 1                            | 1           | 1         | 1         | 1              | 1                     | 0                          | 0                  | 1                                | 0                             | 0                 | 1          | 10      | Moderate      |
| 2   | Grimstad/ 1999                | 1        | 1          | 1             | 1                            | 1           | 1         | 1         | 0              | 0                     | 0                          | 0                  | 1                                | 1                             | 0                 | 0          | 9       | Low           |
| 3   | Hardcastle et al., 2022       | 1        | 1          | 1             | 1                            | 1           | 1         | 1         | 1              | 1                     | 0                          | 1                  | 1                                | 1                             | 1                 | 1          | 14      | High          |
| 4   | Noll/ 2007                    | 1        | 1          | 1             | 0                            | 0           | 1         | 1         | 0              | 0                     | 0                          | 0                  | 1                                | 1                             | 0                 | 0          | 7       | Low           |
| 5   | Leeners/ 2014                 | 0        | 1          | 1             | 0                            | 0           | 1         | 0         | 0              | 0                     | 0                          | 0                  | 0                                | 0                             | 0                 | 1          | 10      | Moderate      |
| 6   | Selk/2016                     | 1        | 1          | 1             | 1                            | 1           | 1         | 1         | 1              | 1                     | 0                          | 1                  | 1                                | 1                             | 0                 | 1          | 13      | High          |
| 7   | Harville/2010                 | 1        | 1          | 1             | 0                            | 1           | 1         | 1         | 1              | 1                     | 1                          | 1                  | 0                                | 1                             | 0                 | 1          | 12      | Moderate      |
| 8   | Versteegen et al., 2021       | 1        | 1          | 1             | 1                            | 1           | 1         | 1         | 1              | 1                     | 0                          | 1                  | 1                                | 1                             | 1                 | 1          | 14      | High          |
| 9   | Stanhope et al., 2020         | 1        | 1          | 1             | 1                            | 1           | 1         | 1         | 1              | 1                     | 0                          | 1                  | 1                                | 1                             | 1                 | 1          | 14      | High          |
| 10  | Schoenaker et al., 2019       | 1        | 1          | 1             | 1                            | 1           | 1         | 1         | 1              | 1                     | 0                          | 1                  | 1                                | 1                             | 1                 | 1          | 14      | High          |
| 11  | Miller et al., 2017           | 1        | 1          | 1             | 1                            | 1           | 1         | 0         | 0              | 1                     | 0                          | 1                  | 0                                | 1                             | 0                 | 0          | 9       | Low           |
| 12  | Mersky et al., 2019           | 1        | 1          | 1             | 1                            | 1           | 1         | 1         | 1              | 1                     | 0                          | 1                  | 1                                | 1                             | 0                 | 1          | 13      | High          |
| 13  | Mason et al., 2016            | 1        | 1          | 1             | 1                            | 1           | 1         | 1         | 1              | 1                     | 0                          | 1                  | 1                                | 1                             | 0                 | 1          | 13      | High          |
| 14  | Cammack et al., 2018          | 1        | 1          | 1             | 1                            | 1           | 1         | 1         | 1              | 1                     | 0                          | 1                  | 1                                | 1                             | 0                 | 1          | 13      | High          |
| 15  | BALA et al., 2020             | 1        | 1          | 1             | 1                            | 1           | 1         | 1         | 0              | 1                     | 0                          | 1                  | 1                                | 1                             | 0                 | 1          | 12      | Moderate      |
| 16  | Ben Salah et al, 2019         | 1        | 1          | 1             | 1                            | 1           | 1         | 1         | 1              | 1                     | 0                          | 1                  | 1                                | 1                             | 0                 | 1          | 13      | High          |
| 17  | Bhengru, 2019                 | 1        | 1          | 1             | 1                            | 1           | 1         | 0         | 1              | 1                     | 1                          | 1                  | 1                                | 1                             | 0                 | 0          | 12      | Moderate      |
| 18  | Gillespie et al. (2017)       | 1        | 1          | 1             | 0                            | 1           | 1         | 1         | 0              | 1                     | 1                          | 1                  | 1                                | 0                             | 0                 | 0          | 10      | Moderate      |
| 19  | Leeners et al, 2014           | 1        | 1          | 1             | 1                            | 1           | 1         | 1         | 1              | 1                     | 1                          | 1                  | 1                                | 1                             | 1                 | 1          | 15      | High          |
| 20  | McDonnell and Val et al, 2014 | 1        | 1          | 1             | 1                            | 1           | 1         | 1         | 1              | 1                     | 1                          | 1                  | 1                                | 1                             | 0                 | 1          | 14      | High          |
| 21  | Shaikh et al., 2019           | 1        | 1          | 1             | 1                            | 0           | 0         | 1         | 1              | 1                     | 0                          | 1                  | 0                                | 1                             | 1                 | 1          | 11      | Moderate      |
| 22  | Smith et al., 2016            | 1        | 1          | 1             | 1                            | 0           | 0         | 1         | 1              | 1                     | 0                          | 1                  | 0                                | 0                             | 1                 | 1          | 10      | Moderate      |
| 23  | Ranchod et al, 2016           | 1        | 1          | 1             | 1                            | 0           | 0         | 1         | 0              | 1                     | 0                          | 1                  | 0                                | 0                             | 0                 | 1          | 8       | Low           |
| 24  | Appleton et al, 2019          | 1        | 1          | 1             | 1                            | 0           | 0         | 1         | 0              | 1                     | 0                          | 1                  | 0                                | 1                             | 1                 | 0          | 9       | Low           |
| 25  | Fredriksen et al, 2017        | 1        | 1          | 1             | 1                            | 0           | 0         | 1         | 1              | 1                     | 0                          | 1                  | 0                                | 0                             | 0                 | 0          | 8       | Low           |

|    |                         |   |   |   |   |   |   |   |   |   |   |   |   |   |   |   |    |          |
|----|-------------------------|---|---|---|---|---|---|---|---|---|---|---|---|---|---|---|----|----------|
| 26 | Hantsoo et al,2019      | 1 | 1 | 1 | 1 | 0 | 0 | 1 | 0 | 1 | 0 | 1 | 0 | 0 | 0 | 1 | 8  | Low      |
| 27 | Letourneau et al, 2019  | 1 | 1 | 1 | 1 | 0 | 0 | 1 | 1 | 1 | 0 | 1 | 0 | 0 | 1 | 1 | 10 | Moderate |
| 28 | Howell1,2020            | 1 | 1 | 1 | 1 | 0 | 1 | 1 | 1 | 1 | 1 | 1 | 0 | 0 | 1 | 1 | 12 | Moderate |
| 29 | Narayan et al, 2018     | 1 | 1 | 1 | 1 | 0 | 0 | 1 | 1 | 1 | 0 | 1 | 0 | 0 | 1 | 0 | 9  | Low      |
| 30 | Racine et al, 2020      | 1 | 1 | 1 | 1 | 0 | 0 | 1 | 0 | 1 | 0 | 1 | 0 | 0 | 0 | 1 | 8  | Low      |
| 31 | Young-Wolff et al, 2019 | 1 | 1 | 1 | 1 | 0 | 0 | 1 | 1 | 1 | 0 | 1 | 0 | 1 | 1 | 1 | 11 | Moderate |
| 32 | Barrios et al, 2015     | 1 | 1 | 1 | 1 | 0 | 0 | 1 | 1 | 1 | 0 | 1 | 0 | 1 | 1 | 1 | 11 | Moderate |

1  
2  
3  
4  
5  
6  
7  
8  
9  
10  
11  
12  
13  
14  
15  
16  
17  
18  
19  
20  
21  
22  
23  
24  
25  
26  
27  
28  
29  
30  
31  
32  
33  
34  
35  
36  
37  
38  
39  
40  
41  
42  
43  
44  
45  
46  
47  
48  
49  
50  
51  
52  
53  
54  
55  
56  
57  
58  
59  
60

For peer review only

## Adverse Childhood Experiences, the Risk of Pregnancy Complications and Adverse Pregnancy Outcomes: A Systematic Review and Meta-analysis

| Section/Topic             | Item # | Recommendation                                                                                                                                                                                                                                                                                                                                                                                                                                                         | Reported on page # |
|---------------------------|--------|------------------------------------------------------------------------------------------------------------------------------------------------------------------------------------------------------------------------------------------------------------------------------------------------------------------------------------------------------------------------------------------------------------------------------------------------------------------------|--------------------|
| Title and abstract        | 1      | (a) Indicate the study's design with a commonly used term in the title or the abstract                                                                                                                                                                                                                                                                                                                                                                                 | 2                  |
|                           |        | (b) Provide in the abstract an informative and balanced summary of what was done and what was found                                                                                                                                                                                                                                                                                                                                                                    | 2                  |
| <b>Introduction</b>       |        |                                                                                                                                                                                                                                                                                                                                                                                                                                                                        |                    |
| Background/rationale      | 2      | Explain the scientific background and rationale for the investigation being reported                                                                                                                                                                                                                                                                                                                                                                                   | 4                  |
| Objectives                | 3      | State specific objectives, including any pre-specified hypotheses                                                                                                                                                                                                                                                                                                                                                                                                      | 5                  |
| <b>Methods</b>            |        |                                                                                                                                                                                                                                                                                                                                                                                                                                                                        |                    |
| Study design              | 4      | Present key elements of study design early in the paper                                                                                                                                                                                                                                                                                                                                                                                                                | 5                  |
| Setting                   | 5      | Describe the setting, locations, and relevant dates, including periods of recruitment, exposure, follow-up, and data collection                                                                                                                                                                                                                                                                                                                                        | 6                  |
| Participants              | 6      | (a) <i>Cohort study</i> —Give the eligibility criteria, and the sources and methods of selection of participants. Describe methods of follow-up<br><i>Case-control study</i> —Give the eligibility criteria, and the sources and methods of case ascertainment and control selection. Give the rationale for the choice of cases and controls<br><i>Cross-sectional study</i> —Give the eligibility criteria, and the sources and methods of selection of participants | 6                  |
|                           |        | (b) <i>Cohort study</i> —For matched studies, give matching criteria and number of exposed and unexposed<br><i>Case-control study</i> —For matched studies, give matching criteria and the number of controls per case                                                                                                                                                                                                                                                 | 6                  |
| Variables                 | 7      | Clearly define all outcomes, exposures, predictors, potential confounders, and effect modifiers. Give diagnostic criteria, if applicable                                                                                                                                                                                                                                                                                                                               | 6                  |
| Data sources/ measurement | 8*     | For each variable of interest, give sources of data and details of methods of assessment (measurement). Describe comparability of assessment methods if there is more than one group                                                                                                                                                                                                                                                                                   | 6                  |
| Bias                      | 9      | Describe any efforts to address potential sources of bias                                                                                                                                                                                                                                                                                                                                                                                                              | 6                  |
| Study size                | 10     | Explain how the study size was arrived at                                                                                                                                                                                                                                                                                                                                                                                                                              | 6                  |
| Quantitative variables    | 11     | Explain how quantitative variables were handled in the analyses. If applicable, describe which groupings were chosen and why                                                                                                                                                                                                                                                                                                                                           | 6                  |
| Statistical methods       | 12     | (a) Describe all statistical methods, including those used to control for confounding                                                                                                                                                                                                                                                                                                                                                                                  | 7                  |
|                           |        | (b) Describe any methods used to examine subgroups and interactions                                                                                                                                                                                                                                                                                                                                                                                                    | 7                  |
|                           |        | (c) Explain how missing data were addressed                                                                                                                                                                                                                                                                                                                                                                                                                            | 7                  |
|                           |        | (d) <i>Cohort study</i> —If applicable, explain how loss to follow-up was addressed<br><i>Case-control study</i> —If applicable, explain how matching of cases and controls was addressed                                                                                                                                                                                                                                                                              | 7                  |

1  
2  
3  
4  
5  
6  
7  
8  
9  
10  
11  
12  
13  
14  
15  
16  
17  
18  
19  
20  
21  
22  
23  
24  
25  
26  
27  
28  
29  
30  
31  
32  
33  
34  
35  
36  
37  
38  
39  
40  
41  
42  
43  
44  
45  
46

|                          |     |                                                                                                                                                                                                              |      |
|--------------------------|-----|--------------------------------------------------------------------------------------------------------------------------------------------------------------------------------------------------------------|------|
|                          |     | <i>Cross-sectional study</i> —If applicable, describe analytical methods taking account of sampling strategy                                                                                                 |      |
|                          |     | (e) Describe any sensitivity analyses                                                                                                                                                                        | 7    |
| <b>Results</b>           |     |                                                                                                                                                                                                              |      |
| Participants             | 13* | (a) Report numbers of individuals at each stage of study—eg numbers potentially eligible, examined for eligibility, confirmed eligible, included in the study, completing follow-up, and analysed            | 8-14 |
|                          |     | (b) Give reasons for non-participation at each stage                                                                                                                                                         | 8-14 |
|                          |     | (c) Consider use of a flow diagram                                                                                                                                                                           | 8-14 |
| Descriptive data         | 14* | (a) Give characteristics of study participants (eg demographic, clinical, social) and information on exposures and potential confounders                                                                     | 8-14 |
|                          |     | (b) Indicate number of participants with missing data for each variable of interest                                                                                                                          | 8-14 |
|                          |     | (c) <i>Cohort study</i> —Summarise follow-up time (eg, average and total amount)                                                                                                                             | 8-14 |
| Outcome data             | 15* | <i>Cohort study</i> —Report numbers of outcome events or summary measures over time                                                                                                                          | 8-14 |
|                          |     | <i>Case-control study</i> —Report numbers in each exposure category, or summary measures of exposure                                                                                                         | 8-14 |
|                          |     | <i>Cross-sectional study</i> —Report numbers of outcome events or summary measures                                                                                                                           | 8-14 |
| Main results             | 16  | (a) Give unadjusted estimates and, if applicable, confounder-adjusted estimates and their precision (eg, 95% confidence interval). Make clear which confounders were adjusted for and why they were included | 8-14 |
|                          |     | (b) Report category boundaries when continuous variables were categorized                                                                                                                                    | 8-14 |
|                          |     | (c) If relevant, consider translating estimates of relative risk into absolute risk for a meaningful time period                                                                                             | 8-14 |
| Other analyses           | 17  | Report other analyses done—eg analyses of subgroups and interactions, and sensitivity analyses                                                                                                               |      |
| <b>Discussion</b>        |     |                                                                                                                                                                                                              |      |
| Key results              | 18  | Summarise key results with reference to study objectives                                                                                                                                                     | 15   |
| Limitations              | 19  | Discuss limitations of the study, taking into account sources of potential bias or imprecision. Discuss both direction and magnitude of any potential bias                                                   | 15   |
| Interpretation           | 20  | Give a cautious overall interpretation of results considering objectives, limitations, multiplicity of analyses, results from similar studies, and other relevant evidence                                   | 16   |
| Generalisability         | 21  | Discuss the generalisability (external validity) of the study results                                                                                                                                        | 16   |
| <b>Other information</b> |     |                                                                                                                                                                                                              |      |
| Funding                  | 22  | Give the source of funding and the role of the funders for the present study and, if applicable, for the original study on which the present article is based                                                | 16   |
